# Supplementary material
Source: publisher figshare collection journal article supplement (https://gsajournals.figshare.com/ndownloader/files/17872361)
Supplement: Supplementary file 1 [file 17872361]

YALI1_ID	YALI0_ID	log2FC.H1	adjusted..P.Value.H1	log2FC.H2	adjusted..P.Value.H2	log2FC.H3	adjusted..P.Value.H3
cob	NA	1.388652037	0.477763085	-3.196548608	0.000206965	-2.80877351	0.012549133
cox1	NA	0.850988989	0.499218872	-1.381276574	0.078354057	-1.445215343	0.070541052
nad5	NA	0.403806313	0.709887118	-1.414156634	0.013826359	-1.304483625	0.033746173
rnl	NA	0.853700719	0.408985309	-1.457565287	0.037914687	-1.314612138	0.081976469
rns	NA	0.915827171	0.451699138	-1.379136583	0.09303346	-1.335886231	0.122866004
YALI1_A00014g	NA	-0.011698654	0.963714582	0.086015119	0.665829335	0.096940056	0.576538918
YALI1_A00019g	NA	0.069383364	0.756576348	-0.039705628	0.860887112	-0.120260172	0.467016403
YALI1_A00058g	YALI0A00110g	0.04708925	0.873404443	-0.215052558	0.255158053	-0.101373762	0.637151335
YALI1_A00102g	YALI0A00132g	-0.018324304	0.944927529	0.021132717	0.931841208	-0.020542589	0.933755534
YALI1_A00148g	YALI0A00154g	0.003577828	0.992875511	-0.055930898	0.907512116	-0.092056813	0.819318309
YALI1_A00204g	YALI0A00176g	0.3272627	0.459077865	-0.667870965	0.059654838	-0.275434901	0.473014128
YALI1_A00241g	YALI0A00198g	-0.045722548	0.901422809	0.103527226	0.703248094	0.14292859	0.573528571
YALI1_A00252g	YALI0A00212g	0.206163655	0.164558828	-0.136831108	0.334700382	-0.128755288	0.348794285
YALI1_A00309g	YALI0A00264g	-0.121034279	0.42476445	0.122981082	0.353627146	0.088086956	0.539413648
YALI1_A00325g	YALI0A00286g	0.081133223	0.624392067	-0.127971326	0.333295705	-0.10332399	0.44819933
YALI1_A00375g	YALI0A00330g	0.164703841	0.271803682	-0.128651882	0.355863423	-0.208547818	0.077339785
YALI1_A00406g	YALI0A00352g	-0.141569566	0.475222065	0.127650017	0.480847178	0.10754485	0.561203337
YALI1_A00447g	YALI0A00369g	-0.062552043	0.878482244	0.057414866	0.878654133	0.12220212	0.694489722
YALI1_A00468g	YALI0A00374g	0.565049784	0.47425755	-1.092431626	0.054489278	-0.471652876	0.460440956
YALI1_A00504g	YALI0A00396g	-0.085737382	0.540543048	0.135027632	0.229623356	0.112735313	0.325265727
YALI1_A00538g	YALI0A00418g	0.074345258	0.573097513	-0.117225563	0.242037869	-0.054638459	0.633996928
YALI1_A00558g	YALI0A00440g	0.074972429	0.58096436	-0.023109156	0.8750323	-0.055312421	0.650304975
YALI1_A00574g	NA	0.026522599	0.922564835	0.01625298	0.94636721	0.03328515	0.8777064
YALI1_A00601g	YALI0A00506g	-0.08387166	0.659524682	0.097448235	0.550093884	0.040395926	0.823924518
YALI1_A00683g	YALI0A00550g	-0.026240254	0.933691848	-0.049810486	0.854849702	-0.042953047	0.868293331
YALI1_A00715g	YALI0A00572g	0.270842543	0.493134569	-0.128724557	0.723517964	-0.213599854	0.50511265
YALI1_A00746g	YALI0A00594g	0.012523049	0.964546123	-0.007811523	0.975039947	-0.069818026	0.756962203
YALI1_A00789g	YALI0A00616g	0.014300796	0.967699786	-0.158233352	0.53158033	-0.108317939	0.678426355
YALI1_A00801g	YALI0A00638g	0.236644875	0.234336545	-0.323350071	0.036422332	-0.320683539	0.032792413
YALI1_A00829g	YALI0A00660g	-0.308632918	0.045905957	0.169071639	0.308457844	0.266323432	0.056591603
YALI1_A00867g	YALI0A00682g	-0.432035494	0.246582418	0.131344045	0.762128894	0.415968877	0.196775027
YALI1_A00905g	NA	-0.479618123	0.557169374	0.882797087	0.176989521	0.629860781	0.328103163
YALI1_A00911g	NA	-0.464695717	0.276720204	0.200962932	0.642185839	0.474615335	0.195091143
YALI1_A00947g	YALI0A00759g	-0.110821992	0.257574037	0.10177227	0.255920965	0.080410917	0.37322488
YALI1_A00983g	YALI0A00781g	0.169215249	0.224820105	-0.176688116	0.13944225	-0.161865391	0.165258586
YALI1_A01061g	YALI0A00803g	-0.072096329	0.640681689	0.051682694	0.718206967	0.054719398	0.698336246
YALI1_A01074g	NA	-0.046826513	0.911280215	-0.049226002	0.88894704	0.088109746	0.785355978
YALI1_A01093g	YALI0A00825g	0.013243142	0.952164549	-0.025625081	0.897068592	-0.039895006	0.81861466
YALI1_A01122g	YALI0A00847g	0.591786346	0.019479083	-0.172817211	0.594309235	-0.476790227	0.054181011
YALI1_A01143g	YALI0A00869g	-0.008573937	0.982986952	0.278444686	0.263727745	0.088713402	0.764959512
YALI1_A01173g	YALI0A00891g	-0.167337144	0.092607611	0.13982366	0.121310163	0.154552453	0.077890465
YALI1_A01198g	YALI0A00913g	0.129145944	0.452087215	-0.229491973	0.082170984	-0.217489693	0.098464997
YALI1_A01230g	NA	0.540117274	0.26532168	-0.305392378	0.52137812	-0.366129644	0.394912784
YALI1_A01240g	YALI0A00935g	0.042677976	0.908063133	0.026855088	0.935786161	0.074789761	0.791329594
YALI1_A01241g	NA	0.032911343	0.925025281	-0.127342012	0.630112041	0.019715254	0.947844775
YALI1_A01249g	YALI0A00957g	-0.042412624	0.84627636	0.100542754	0.552692021	0.041067666	0.81861466
YALI1_A01267g	YALI0A00979g	-0.189707845	0.109447218	0.200141017	0.053229659	0.215772064	0.026309135
YALI1_A01298g	YALI0A01001g	0.034107229	0.802274229	0.07734658	0.446903628	-0.011531078	0.927116393
YALI1_A01394g	YALI0A01023g	-0.29845224	0.193002786	0.320432222	0.096537368	0.343701555	0.073791505
YALI1_A01468g	YALI0A01045g	-0.050100285	0.695016745	0.120102498	0.193225695	0.041227499	0.711155259
YALI1_A01505g	YALI0A01067g	-0.030283213	0.872112739	0.051463038	0.737780251	0.087831141	0.503865379
YALI1_A01537g	YALI0A01089g	0.441839228	0.678634456	0.216906688	0.84906824	-0.248298103	0.794796173
YALI1_A01577g	YALI0A01111g	0.134348147	0.311661806	-0.044169124	0.765916893	-0.101240664	0.388429351
YALI1_A01602g	YALI0A01133g	-0.153087823	0.854541296	0.330157734	0.612117983	0.086537464	0.906791162
YALI1_A01618g	NA	0.155868987	0.673331232	0.05797526	0.878539478	-0.009520479	0.979432888
YALI1_A01628g	YALI0A01155g	-0.017748543	0.942496984	0.225112127	0.148891297	0.08774634	0.634770201
YALI1_A01717g	YALI0A01331g	0.060867826	0.783063868	-0.166122198	0.293996262	-0.114152473	0.488760966
YALI1_A01732g	NA	0.000878607	0.99806308	-0.276859639	0.255158053	-0.122788306	0.656343522
YALI1_A01736g	NA	0.130240801	0.764781909	-0.181563762	0.604311607	-0.143845348	0.677739685
YALI1_A01766g	YALI0A01353g	0.032053179	0.946880945	-0.300974902	0.353102347	-0.236760328	0.471677907
YALI1_A01777g	YALI0A01375g	0.208014492	0.549954235	-0.355070664	0.184280466	-0.36220407	0.158437209
YALI1_A01786r	YALI0A01389r	-0.119895489	0.789248091	0.052354407	0.9065717	-0.019914637	0.963288273
YALI1_A01794g	YALI0A01397g	-0.077862636	0.508243918	0.044081811	0.706479733	0.073842449	0.45985103
YALI1_A01824g	YALI0A01419g	0.12364703	0.414495878	-0.098532359	0.495400394	-0.129049771	0.32398914
YALI1_A01842g	YALI0A01441g	0.055414015	0.892151995	0.206252522	0.508256528	0.101922238	0.753188498
YALI1_A01854g	NA	0.22203539	0.601819222	0.074982842	0.871768985	0.010326805	0.981466796
YALI1_A01864g	YALI0A01452g	-0.010290154	0.963260961	-0.187636823	0.158917387	-0.052125144	0.756962203
YALI1_A01868g	NA	0.035003251	0.917159642	-0.20570154	0.345727812	0.019980802	0.944967433
YALI1_A01888g	YALI0A01463g	-0.009910287	0.942489241	-0.086148833	0.35194407	-0.018622278	0.871286821
YALI1_A01905g	YALI0A01485g	0.004782454	0.97870226	0.008935653	0.950338377	-0.03575347	0.779662177
YALI1_A02022g	NA	0.143304951	0.784748365	-0.590291899	0.066268646	-0.371532338	0.293407697
YALI1_A02037g	YALI0A01650g	0.315220608	0.470012895	-0.692910313	0.017548168	-0.537251145	0.088035248
YALI1_A02075g	YALI0A01716g	0.244071858	0.387288723	-0.185181656	0.46120462	-0.178460382	0.458760806
YALI1_A02083g	YALI0A01738g	0.193620789	0.152571133	-0.229529065	0.038951247	-0.197207372	0.082207346
YALI1_A02096g	YALI0A01760g	-0.021819627	0.9108163	-0.000285102	0.998184601	0.031738852	0.840299957
YALI1_A02113g	NA	0.137003333	0.544637234	-0.234137721	0.161392298	-0.248146714	0.11522016
YALI1_A02131g	YALI0A01782g	-0.033146402	0.815681381	-0.070165307	0.518339772	0.034227348	0.773250489
YALI1_A02150g	YALI0A01826g	0.07533142	0.800869885	-0.281106592	0.152885005	-0.201602697	0.322649302
YALI1_A02190g	YALI0A01848g	0.159464642	0.554162052	-0.370939945	0.036161035	-0.181789646	0.383118708
YALI1_A02198g	YALI0A01870g	0.357001499	0.721047444	0.482261505	0.514231064	-0.108936267	0.903477377
YALI1_A02263g	YALI0A01892g	-0.4019159	0.033488769	0.38445203	0.024360851	0.430812542	0.007698129
YALI1_A02301g	NA	-0.272512713	0.586406724	0.579716826	0.127195862	0.31943437	0.427337353
YALI1_A02335g	YALI0A01958g	0.567292881	0.733368387	-1.50185424	0.151787484	-0.933234948	0.424276284
YALI1_A02365g	YALI0A01980g	0.005970301	0.989069231	0.124985467	0.736178215	0.153624405	0.650711296
YALI1_A02394g	YALI0A02002g	-0.060207266	0.87030234	0.209685618	0.413565225	0.025345628	0.936938699
YALI1_A02426g	YALI0A02024g	-0.031736793	0.913921822	-0.017280137	0.94770518	0.040219801	0.866842579
YALI1_A02443g	YALI0A02046g	0.129374531	0.504762208	-0.018431116	0.934272067	-0.078809508	0.655857141
YALI1_A02461g	YALI0A02068g	0.058684688	0.846371676	-0.182535474	0.393210578	-0.176950622	0.388429351
YALI1_A02470g	YALI0A02090g	-0.133455765	0.37154157	0.105594427	0.463271057	0.115789558	0.376643679
YALI1_A02499g	YALI0A02112g	0.090177369	0.521970606	0.018324232	0.908739309	-0.042176573	0.756962203
YALI1_A02546g	YALI0A02134g	0.035972654	0.71223885	-0.023604053	0.801895662	-0.017233846	0.855106149
YALI1_A02552g	YALI0A02156g	0.213883507	0.255842933	-0.214512148	0.185311115	-0.243386398	0.099733677
YALI1_A02561g	YALI0A02178g	0.237044718	0.166213824	-0.249019511	0.084419575	-0.260109123	0.057205037
YALI1_A02568g	YALI0A02200g	0.093030336	0.3972755	-0.130422555	0.143149945	-0.066957782	0.502912142
YALI1_A02615g	YALI0A02222g	-0.183953669	0.091610509	0.215773389	0.014751337	0.198990102	0.029075697
YALI1_A02653g	YALI0A02244g	-0.106033711	0.451937001	0.244237345	0.015593496	0.175841711	0.090863197
YALI1_A02682g	YALI0A02266g	0.037197666	0.932901266	-0.29014202	0.325980324	-0.207453931	0.496462691
YALI1_A02728g	YALI0A02288g	-0.114239973	0.528610913	0.035506066	0.861514596	0.066195748	0.700749337
YALI1_A02775g	YALI0A02310g	-0.04949914	0.659993667	0.005416236	0.961757384	0.025326229	0.812952057
YALI1_A02813g	YALI0A02332g	0.153376166	0.297864829	-0.073480418	0.624369336	-0.086145327	0.534711835
YALI1_A02819g	NA	0.114362307	0.829570169	0.202528327	0.6548465	-0.064294003	0.889449803
YALI1_A02833g	YALI0A02354g	-0.169424274	0.160918348	0.210769169	0.034937489	0.20290792	0.042579895
YALI1_A02875g	NA	-0.111914071	0.774654561	0.258293895	0.361195689	0.208791976	0.456985068
YALI1_A02895g	YALI0A02409g	0.220614753	0.398337378	-0.372091656	0.057529799	-0.204598232	0.350542416
YALI1_A02947g	YALI0A02431g	0.138839238	0.375247452	-0.016449117	0.931228233	-0.087017942	0.540996414
YALI1_A02974g	YALI0A02453g	-0.0178416	0.930145419	0.037317411	0.832135495	0.071259272	0.629168832
YALI1_A02998g	YALI0A02475g	-0.371235147	0.510674073	-0.259316432	0.638847725	-0.065229401	0.916433685
YALI1_A03017g	NA	0.127681136	0.85409737	0.18416659	0.756939386	-0.115781662	0.838797593
YALI1_A03029g	YALI0A02497g	-0.130857573	0.574305598	0.067688865	0.771745888	0.10112892	0.634408337
YALI1_A03069g	YALI0A02541g	0.022259138	0.859646373	0.004309005	0.968478366	0.0298692	0.768986452
YALI1_A03081g	YALI0A02563g	0.060645133	0.756006077	-0.065856899	0.696240723	-0.067018355	0.67397257
YALI1_A03091g	YALI0A02585g	0.035082556	0.810836738	-0.020269889	0.883249656	-0.020919293	0.871209835
YALI1_A03116g	YALI0A02607g	0.089111611	0.873938014	0.23735589	0.578565113	0.043187726	0.929964758
YALI1_A03137g	YALI0A02629g	-0.074762841	0.775204712	0.215828242	0.25418396	0.184136467	0.308858948
YALI1_A03153g	YALI0A02651g	0.236227133	0.166023198	-0.261443586	0.080051964	-0.29156085	0.041598873
YALI1_A03170g	YALI0A02673g	0.082703069	0.710038991	-0.020369336	0.931228233	-0.024041999	0.913943963
YALI1_A03183g	YALI0A02695g	0.029610955	0.895067746	-0.048095195	0.809958434	-0.063882232	0.726509747
YALI1_A03210g	YALI0A02717g	0.023307577	0.850981401	-0.024772562	0.818532788	-0.035599568	0.710758231
YALI1_A03278g	YALI0A02849g	0.284316295	0.265972286	-0.317464368	0.152491942	-0.370653148	0.068645667
YALI1_A03289g	YALI0A02871g	0.137374089	0.347986952	-0.020755612	0.906500537	-0.036774382	0.8124915
YALI1_A03300g	YALI0A02893g	-0.01396104	0.957068051	0.012733782	0.956616235	-0.007360116	0.974890178
YALI1_A03322g	YALI0A02915g	0.046363985	0.774742357	-0.119893468	0.311955656	-0.080640122	0.532163036
YALI1_A03351g	YALI0A02937g	0.153263615	0.333927933	-0.255927895	0.034937489	-0.209463621	0.092800668
YALI1_A03356g	YALI0A02959g	0.035733423	0.707809142	-0.038499833	0.637296618	-0.012497665	0.891516977
YALI1_A03396g	YALI0A02981g	0.021435606	0.881231549	0.048056249	0.677228847	-0.037955227	0.753188498
YALI1_A03402g	YALI0A03003g	0.102552658	0.67137258	-0.050336563	0.833028912	-0.133508493	0.476597748
YALI1_A03422g	YALI0A03025g	-0.107570926	0.398337378	0.142682075	0.183195077	0.126443489	0.23900196
YALI1_A03450g	YALI0A03091g	-0.268737507	0.8674581	1.848982159	0.062734685	0.860010502	0.421396922
YALI1_A03487g	YALI0A03113g	0.236155901	0.166418685	-0.108291162	0.550124001	-0.171842804	0.274159282
YALI1_A03512g	YALI0A03135g	-0.449104221	0.075231508	0.229898943	0.354555942	0.284339375	0.219848713
YALI1_A03567g	YALI0A03201g	0.216360654	0.709548729	-0.105490205	0.842948972	-0.051799602	0.925057195
YALI1_A03579g	YALI0A03223g	-0.013800157	0.970788519	-0.056662764	0.854277535	-0.069508892	0.799091803
YALI1_A03599g	NA	-0.247387028	0.401224082	-0.0565972	0.872145006	0.183178684	0.484283532
YALI1_A03624g	YALI0A03245g	-0.158739541	0.150181017	0.147048843	0.141734945	0.150947562	0.10534771
YALI1_A03669g	YALI0A03399g	0.152516047	0.572956645	-0.242998612	0.250013472	-0.239101223	0.243805064
YALI1_A03688g	YALI0A03421g	-0.180369811	0.765650742	0.037443462	0.952088696	0.192494491	0.700927192
YALI1_A03721g	YALI0A03443g	-0.049667539	0.645185872	0.122032482	0.107669189	0.076743038	0.350157458
YALI1_A03757g	YALI0A03509g	0.185015629	0.503982143	-0.214264512	0.375149721	-0.284687071	0.196775027
YALI1_A03763g	YALI0A03531g	0.150763114	0.453186466	-0.262170784	0.084182757	-0.215778366	0.158437209
YALI1_A03803g	YALI0A03553g	-0.045965232	0.715079646	0.052712188	0.628386094	0.070606935	0.473325557
YALI1_A03809g	YALI0A03575g	0.288261958	0.071566618	-0.20063235	0.179859382	-0.248196516	0.062784062
YALI1_A03815g	NA	0.00313338	0.989882993	0.112627651	0.608511172	0.086565017	0.686864679
YALI1_A03837g	YALI0A03597g	-0.148723158	0.215769796	0.101703856	0.371994477	0.099093251	0.394912784
YALI1_A03842g	NA	0.289738516	0.420507491	-0.064535172	0.872539431	-0.253321699	0.391477829
YALI1_A03857g	YALI0A03641g	0.08055085	0.571768378	0.017028559	0.912677223	-0.050722282	0.692310862
YALI1_A03883g	YALI0A03663g	-0.095255763	0.542077997	0.117233039	0.371994477	0.122872474	0.31639473
YALI1_A03900g	NA	0.077950802	0.70497542	-0.146887162	0.333497365	-0.075722549	0.650796866
YALI1_A03907g	YALI0A03685g	0.037184089	0.868252889	-0.063955568	0.718110129	0.01483893	0.938989442
YALI1_A03937g	YALI0A03751g	0.05441039	0.599875334	-0.00581648	0.958234446	-0.016829137	0.869511487
YALI1_A03964g	YALI0A03773g	0.306362987	0.25897221	-0.304227552	0.209379559	-0.395032941	0.068645667
YALI1_A04006g	YALI0A03817g	0.173167662	0.684212989	-0.078918488	0.852218346	-0.063965553	0.875372954
YALI1_A04022g	YALI0A03839g	0.064236645	0.739020383	-0.078360283	0.641975123	-0.112301207	0.461580082
YALI1_A04071g	YALI0A03861g	0.09956669	0.405993996	-0.016841204	0.906500537	-0.067669265	0.535215494
YALI1_A04109g	YALI0A03883g	-0.075439365	0.393580998	0.084833663	0.269118965	0.082150675	0.278189437
YALI1_A04119g	YALI0A03905g	0.052940524	0.864807742	-0.181194335	0.40700461	-0.152755018	0.483081514
YALI1_A04164g	NA	0.379193838	0.401031726	-0.584319284	0.09149163	-0.281740578	0.465144031
YALI1_A04178g	YALI0A03927g	0.07598434	0.597716845	-0.188630222	0.056103928	-0.106474684	0.332374441
YALI1_A04261g	YALI0A03949g	-0.139453547	0.71223885	0.338690862	0.212087885	0.265338546	0.321182397
YALI1_A04309g	YALI0A03971g	0.015352297	0.949533218	-0.118426879	0.46628654	-0.077364304	0.650605965
YALI1_A04332g	YALI0A03993g	0.162157883	0.647161015	-0.230046107	0.363816638	-0.073025267	0.813701746
YALI1_A04341g	YALI0A04059g	0.094955547	0.71593558	-0.175427378	0.361519574	-0.018613765	0.942290535
YALI1_A04359r	YALI0A04081r	0.340501817	0.39181669	-0.465987674	0.111534303	-0.422717641	0.152151967
YALI1_A04385g	YALI0A04125g	0.256786698	0.326110693	-0.115199155	0.663456278	-0.243497863	0.254900089
YALI1_A04398r	YALI0A04147r	0.093171564	0.810836738	-0.049979073	0.886613903	-0.004167799	0.99241682
YALI1_A04415g	YALI0A04191g	-0.036135696	0.871065427	0.191565613	0.184714587	0.174594682	0.209656266
YALI1_A04495g	YALI0A04301g	-0.093437427	0.814579901	0.31620123	0.27042298	0.228215147	0.408512155
YALI1_A04533g	YALI0A04323g	0.132026218	0.485134399	0.029000771	0.891309531	-0.020914031	0.917379219
YALI1_A04561g	YALI0A04345g	-0.002267365	0.986247144	0.032772282	0.770926494	-0.006315671	0.95795217
YALI1_A04576g	YALI0A04367g	0.089315312	0.445371404	-0.062831367	0.57267227	-0.093349761	0.334071695
YALI1_A04620g	YALI0A04455g	0.061294056	0.804314549	0.039895994	0.863425136	0.009552865	0.967543544
YALI1_A04715g	YALI0A04587g	0.349853241	0.071566618	-0.37599137	0.016781441	-0.309820733	0.056682075
YALI1_A04742g	YALI0A04609g	-0.054198562	0.754032328	0.064417788	0.664895271	0.02925119	0.857640476
YALI1_A04781g	YALI0A04631g	0.409494605	0.259520933	-0.179923663	0.602669085	-0.181846527	0.588537148
YALI1_A04795g	YALI0A04631g	0.205597141	0.476274763	-0.113509787	0.676189195	-0.050099705	0.864498088
YALI1_A04815g	YALI0A04653g	0.102709604	0.380079294	-0.015308009	0.913381105	-0.02543897	0.841084133
YALI1_A04817g	YALI0A04675g	0.18157173	0.282144603	-0.282696836	0.026788365	-0.192995739	0.163894143
YALI1_A04848g	YALI0A04697g	-0.149242646	0.169120967	0.068925437	0.556686711	0.123000821	0.215387686
YALI1_A04864g	NA	-0.059510038	0.816415983	-0.118696487	0.540607804	0.047287825	0.826634606
YALI1_A04893g	YALI0A04741g	0.06916385	0.725711418	-0.195446298	0.157570301	-0.117440198	0.424214721
YALI1_A04927g	YALI0A04785g	-0.132544772	0.473770384	0.074281513	0.69080469	0.133549431	0.383054648
YALI1_A04976g	YALI0A04873g	-0.163295471	0.508444211	0.146710976	0.52137812	0.211040133	0.29046437
YALI1_A04983g	NA	-0.211997869	0.489072459	0.204850176	0.461853081	0.184707696	0.477848012
YALI1_A04990g	NA	-0.679693001	0.108245953	0.603181323	0.104809556	0.671145292	0.059481507
YALI1_A05003g	YALI0A04895g	-0.021761953	0.894482402	0.098370363	0.393304969	0.067488958	0.576405823
YALI1_A05031g	YALI0A04917g	0.006127951	0.964107374	0.020962374	0.857189934	0.010706229	0.928293038
YALI1_A05052g	YALI0A04939g	0.081093522	0.813914524	-0.229227337	0.357092184	-0.189200594	0.450220248
YALI1_A05091g	YALI0A04961g	0.305072575	0.097518656	-0.362473022	0.013547139	-0.307685701	0.039860722
YALI1_A05116g	YALI0A04983g	-0.049969362	0.596775595	0.022159842	0.817429724	0.041100144	0.624969528
YALI1_A05168g	YALI0A05027g	-0.122421293	0.240410321	0.043363306	0.710920961	0.117450689	0.191783456
YALI1_A05210g	YALI0A05115g	0.048404835	0.873183997	-0.098752857	0.670071743	-0.055852181	0.814184159
YALI1_A05220g	YALI0A05137g	-0.019310563	0.932638197	0.10333204	0.539429193	0.040331697	0.825848458
YALI1_A05229g	YALI0A05159g	0.186210242	0.36686038	-0.083383982	0.697497172	-0.152016856	0.388896936
YALI1_A05254g	YALI0A05181g	0.172024647	0.624276942	-0.335836435	0.194648274	-0.321563775	0.20546948
YALI1_A05259g	YALI0A05203g	-0.230459212	0.432239945	0.19543747	0.491623901	0.242423559	0.317507407
YALI1_A05335g	YALI0A05247g	-0.036510921	0.773429594	0.052212469	0.619969286	0.045936292	0.66181094
YALI1_A05355g	YALI0A05291g	-0.034884958	0.898899923	-0.018954667	0.940618004	0.025996912	0.911445027
YALI1_A05366g	YALI0A05313g	0.057221265	0.781027397	-0.172483035	0.225893291	-0.078266215	0.623797787
YALI1_A05407g	YALI0A05357g	-0.047524979	0.749728299	0.109578173	0.326875391	0.071344372	0.537646287
YALI1_A05459g	YALI0A05379g	-0.066192959	0.595205524	-0.00088095	0.994510513	0.047466112	0.671264469
YALI1_A05473g	YALI0A05401g	0.060701873	0.802384843	-0.164668096	0.336209409	-0.119473444	0.493203061
YALI1_A05491g	YALI0A05423g	0.193278697	0.292734851	-0.057438687	0.788549969	-0.215849302	0.149944468
YALI1_A05527g	YALI0A05533g	0.124371933	0.69522968	-0.341510881	0.113732429	-0.27454148	0.216609575
YALI1_A05571g	YALI0A05555g	0.075722473	0.830250006	-0.146237105	0.587602445	-0.154308128	0.544177855
YALI1_A05583g	NA	0.092964818	0.71749448	-0.054023731	0.830402658	0.020899575	0.935092902
YALI1_A05592g	NA	0.174742008	0.539509191	-0.173522012	0.470873293	-0.080880027	0.76188984
YALI1_A05605g	YALI0A05577g	-0.142322012	0.161069189	0.136637525	0.130572698	0.150141644	0.084093034
YALI1_A05662g	YALI0A05665g	0.501837497	0.529406633	-0.648780295	0.254451295	-0.320211881	0.625866709
YALI1_A05701g	YALI0A05775g	-0.071383261	0.708356285	0.050477842	0.782858139	0.097646247	0.508212023
YALI1_A05737g	YALI0A05885g	0.034348057	0.947993318	-0.02865472	0.950506013	-0.044141471	0.920353304
YALI1_A05774g	YALI0A05929g	0.015707954	0.900950274	-0.056481092	0.543450787	0.025233763	0.803367975
YALI1_A05795g	YALI0A05951g	0.136460345	0.7621245	-0.332129434	0.316063482	-0.033263171	0.937802453
YALI1_A05798g	NA	-0.314322433	0.428362721	0.074044047	0.878554454	0.201043874	0.589978785
YALI1_A05813g	YALI0A05973g	0.309916261	0.263948347	-0.082244862	0.79931268	-0.111485722	0.692062057
YALI1_A05821g	YALI0A05995g	0.198137227	0.176647892	-0.274865903	0.016145288	-0.263568719	0.020511975
YALI1_A05869g	NA	0.089462164	0.842469559	-0.211945871	0.537362028	-0.189128302	0.558262498
YALI1_A05884g	YALI0A06061g	0.06522589	0.842128091	-0.3616147	0.066268646	-0.183339341	0.410141014
YALI1_A06052g	YALI0A06347g	0.002868182	0.988814452	0.034148938	0.86566866	0.082158513	0.606028884
YALI1_A06073g	YALI0A06369g	-0.050942477	0.68047648	0.097265439	0.301992481	0.043803044	0.680373275
YALI1_A06099g	YALI0A06435g	-0.096110967	0.706494712	-0.017284971	0.947812336	0.082949566	0.717333385
YALI1_A06104g	NA	-0.274010349	0.426760732	-0.03993637	0.929976404	0.212829536	0.491897141
YALI1_A06116g	YALI0A06457g	-0.234980292	0.5653091	-0.187086962	0.59956837	-0.176039757	0.614051632
YALI1_A06128g	YALI0A06479g	0.034344614	0.9108163	-0.057954135	0.827654099	-0.107267391	0.631965354
YALI1_A06149g	YALI0A06501g	0.040398107	0.910631579	-0.008749261	0.978253446	-0.120316971	0.641166492
YALI1_A06169g	YALI0A06523g	0.072161066	0.625235708	-0.03493004	0.811563873	-0.065530655	0.594694999
YALI1_A06174g	NA	0.035841238	0.879711954	0.008025678	0.968691363	-0.006513817	0.976533545
YALI1_A06196g	NA	0.205518715	0.583328491	-0.094385029	0.798073806	-0.020292932	0.957789915
YALI1_A06207g	NA	0.225469988	0.598946383	-0.111923407	0.792899586	-0.066714896	0.871512699
YALI1_A06220g	NA	-0.62844575	0.452418797	0.740745497	0.324832631	0.566155927	0.448920971
YALI1_A06229g	YALI0A06589g	0.288035747	0.20701639	-0.234870205	0.266891867	-0.175496492	0.400958074
YALI1_A06287g	YALI0A06611g	0.004151162	0.987245907	-0.030162108	0.905331098	-0.029414874	0.900016419
YALI1_A06311g	YALI0A06633g	-0.096489549	0.84199398	0.141509994	0.72759935	0.192692094	0.59265392
YALI1_A06361g	YALI0A06655g	-0.047065214	0.685438705	0.056845301	0.558419111	0.044602997	0.662147473
YALI1_A06381g	YALI0A06677g	-0.091294115	0.621934043	0.114213582	0.458082319	0.165054739	0.212935027
YALI1_A06384g	NA	-0.049876236	0.936928213	-0.198114028	0.663456278	-0.040835835	0.938523515
YALI1_A06396g	YALI0A06699g	-0.525238502	0.081713414	0.10217697	0.805310774	0.565203535	0.021339046
YALI1_A06402g	YALI0A06721g	0.123906607	0.763592875	-0.098098839	0.792899586	-0.097795341	0.776857082
YALI1_A06416g	YALI0A06743g	-0.149679727	0.573906499	0.345254308	0.07424609	0.232729865	0.250587648
YALI1_A06434g	YALI0A06765g	0.106154003	0.385676964	-0.163080549	0.10630201	-0.159439848	0.106687888
YALI1_A06453g	YALI0A06787g	-0.111255631	0.398337378	0.211140267	0.035556432	0.165982947	0.112133963
YALI1_A06473g	YALI0A06809g	0.005557568	0.977264458	0.078197962	0.54881954	-0.001330207	0.994681292
YALI1_A06488g	YALI0A06831g	0.102019674	0.351013272	-0.064183095	0.550979071	-0.074247163	0.452511581
YALI1_A06530g	NA	0.095628677	0.81737188	-0.317866956	0.276788441	-0.196379659	0.543444051
YALI1_A06591g	YALI0A06886g	0.022642015	0.884383829	0.049639484	0.694432489	-0.023367502	0.862864509
YALI1_A06594g	YALI0A06908g	0.042418043	0.832488742	0.004788409	0.978579004	0.015486877	0.933755534
YALI1_A06612g	YALI0A06930g	0.085668783	0.708103291	-0.027760744	0.906512621	-0.072600887	0.709984151
YALI1_A06615g	NA	0.155841313	0.599803939	-0.016140127	0.959734658	-0.085729432	0.749623232
YALI1_A06625g	YALI0A06952g	0.375566135	0.378133274	-0.306331743	0.393304969	-0.362981121	0.282216102
YALI1_A06634g	NA	-0.000293055	0.999429379	-0.227984688	0.429918973	-0.033306036	0.928271962
YALI1_A06640g	YALI0A06974g	-0.000849791	0.99812405	0.092223903	0.777766461	0.087864199	0.77203297
YALI1_A06666g	YALI0A06996g	0.059794646	0.684714612	-0.038573404	0.780989766	-0.033589121	0.797883164
YALI1_A06672g	YALI0A07018g	-0.24830093	0.126134659	0.315678578	0.016781441	0.296111842	0.027380467
YALI1_A06721g	YALI0A07062g	0.057529567	0.656289352	-0.095301113	0.335888838	-0.054196611	0.61345684
YALI1_A06735g	NA	0.037715001	0.888845411	0.004537491	0.984145739	-0.023154706	0.921184609
YALI1_A06743g	YALI0A07084g	0.046279622	0.796575558	0.034532287	0.8369912	-0.05839382	0.692177695
YALI1_A06751g	NA	-0.135996928	0.572067568	0.057188834	0.818688645	0.141001762	0.470032581
YALI1_A06761g	NA	-0.06945304	0.83089719	-0.026693459	0.931228233	0.080395443	0.755421134
YALI1_A06778g	YALI0A07106g	0.047739645	0.73782219	-0.074482192	0.524810709	-0.041005765	0.747218417
YALI1_A06815g	NA	0.090211874	0.798947484	0.184993363	0.51850269	0.022359142	0.946620765
YALI1_A06818g	NA	0.200314469	0.432033291	-0.151629483	0.526444037	-0.142464968	0.522364331
YALI1_A06823g	YALI0A07128g	-0.077081812	0.801151579	0.285612188	0.18306921	0.159330683	0.461456184
YALI1_A06958g	YALI0A07403g	0.08649523	0.65917065	-0.163533609	0.264303845	-0.119342702	0.432706747
YALI1_A06989g	YALI0A07425g	0.077972197	0.84627636	-0.163214076	0.579118895	-0.075255069	0.812952057
YALI1_A07014g	YALI0A07447g	-0.259588069	0.208891385	0.254411992	0.185422515	0.281482997	0.093041096
YALI1_A07051g	YALI0A07557g	0.124248774	0.563191942	-0.164558469	0.352930503	-0.045324617	0.827803803
YALI1_A07137g	YALI0A07601g	-0.134558617	0.43312734	0.04684521	0.810435639	0.098590223	0.524243571
YALI1_A07161g	NA	0.042869587	0.916492108	-0.38777763	0.127232696	-0.167136289	0.558272978
YALI1_A07171g	NA	-0.445351905	0.226700947	0.415330727	0.281791222	0.201676896	0.598261017
YALI1_A07201g	YALI0A07623g	-0.046535521	0.878225148	0.060039843	0.821663676	0.093220669	0.683389612
YALI1_A07241g	YALI0A07667g	0.048783799	0.878225148	0.080444739	0.762303457	-0.02616916	0.925146843
YALI1_A07267g	YALI0A07689g	-0.005260442	0.963382178	-0.007177013	0.943408064	0.022528413	0.799619683
YALI1_A07290g	YALI0A07733g	0.03235304	0.877243079	-0.00876442	0.962681912	-0.010548052	0.956273919
YALI1_A07309g	YALI0A07755g	0.065875079	0.720816134	-0.178219413	0.175512354	-0.084878889	0.567576316
YALI1_A07318g	YALI0A07777g	0.016432494	0.95928146	-0.026735979	0.926833266	0.053184146	0.829898318
YALI1_A07326g	YALI0A07799g	0.371389495	0.102382451	-0.403833335	0.030680492	-0.417734659	0.020511975
YALI1_A07349g	YALI0A07821g	0.003584354	0.986930531	-0.110154336	0.500551072	-0.060080354	0.726984961
YALI1_A07357g	NA	0.006216382	0.979865067	-0.158836257	0.300410443	0.000102272	0.999265369
YALI1_A07372g	NA	0.103696341	0.792571452	-0.420689921	0.101577719	-0.017892948	0.962270935
YALI1_A07376g	NA	0.234358226	0.489072459	-0.198814018	0.521058397	-0.287533436	0.273625918
YALI1_A07381g	YALI0A07843g	-0.237861445	0.257322559	0.355255867	0.03814856	0.318618226	0.051278814
YALI1_A07405g	YALI0A07865g	-0.026048815	0.881630052	-0.040657019	0.788549969	-0.033850926	0.812506453
YALI1_A07418g	YALI0A07887g	-0.100013486	0.901455603	0.124796778	0.844904015	0.02520146	0.971771985
YALI1_A07472g	YALI0A07997g	-0.082070314	0.654158849	0.052412557	0.76344824	0.068943866	0.673577577
YALI1_A07538g	YALI0A08019g	-0.109630647	0.555779077	0.183737539	0.213250357	0.16031791	0.260062225
YALI1_A07557g	NA	0.044326214	0.915877296	-0.023050544	0.952409068	-0.076723831	0.814321844
YALI1_A07575g	YALI0A08041g	-0.53477116	0.104279329	0.662659127	0.01402832	0.639843236	0.014215385
YALI1_A07608g	NA	0.00808118	0.97870226	0.13266263	0.511771456	0.025560791	0.913943963
YALI1_A07624g	YALI0A08063g	-0.21493626	0.081713414	0.127407001	0.308419179	0.161382474	0.152852879
YALI1_A07632g	NA	0.029923318	0.923721715	-0.153623994	0.483217633	0.024363324	0.926731863
YALI1_A07635g	NA	-0.146401223	0.539906568	-0.087615662	0.7124585	0.094608328	0.660840452
YALI1_A07649g	YALI0A08077g	-0.124791461	0.181813805	0.102665167	0.229623356	0.113153572	0.179562514
YALI1_A07668g	YALI0A08107g	0.065459365	0.520909288	-0.065207028	0.466455478	-0.071618147	0.394673791
YALI1_A07681g	NA	0.156207496	0.378133274	-0.273009645	0.035075727	-0.203778356	0.135720953
YALI1_A07712g	YALI0A08129g	0.050647238	0.878911301	-0.14781111	0.558857996	-0.123821904	0.617728127
YALI1_A07730g	YALI0A08151g	0.043083725	0.920874529	-0.058245387	0.875757461	-0.105975863	0.74472129
YALI1_A07766g	NA	0.416249604	0.329429627	0.15023186	0.738582933	-0.24287753	0.524243571
YALI1_A07768g	YALI0A08165g	-0.100475885	0.411640813	0.088791953	0.423603286	0.081774172	0.458760806
YALI1_A07937g	YALI0A08239g	-0.118720443	0.439843102	0.162985797	0.203615441	0.107577144	0.426432135
YALI1_A07977g	YALI0A08261g	-0.183825294	0.166023198	0.203398188	0.078129655	0.209977678	0.058454804
YALI1_A08065g	NA	0.806782995	0.103002947	-0.369053394	0.449074316	-0.652244945	0.104173408
YALI1_A08073g	YALI0A08360g	0.00370792	0.993108961	-0.494632521	0.175626751	-0.045576137	0.925678978
YALI1_A08107g	NA	0.01835146	0.966898977	-0.145129751	0.642003575	0.03808943	0.914539064
YALI1_A08115g	NA	0.397990016	0.319438854	-0.341365689	0.311955656	-0.202979326	0.578544566
YALI1_A08126g	YALI0A08404g	-0.015799715	0.978302524	0.031635905	0.948725963	0.080368363	0.852077956
YALI1_A08175g	YALI0A08426g	0.024929166	0.963343423	-0.341178525	0.325053851	-0.226973857	0.536234426
YALI1_A08197g	NA	0.43641378	0.234287965	-0.219461931	0.532703778	-0.427493258	0.136465132
YALI1_A08206g	YALI0A08448g	-0.037990857	0.874130539	-0.036897038	0.86566866	0.035797995	0.857640476
YALI1_A08424g	NA	0.212506196	0.456456671	0.324213413	0.141568963	0.08264689	0.765521334
YALI1_A08436g	YALI0A08536g	-0.230119503	0.129062609	0.344108918	0.003008926	0.303424173	0.007698129
YALI1_A08467g	YALI0A08558g	0.087218734	0.693030415	-0.080547415	0.694432489	-0.053085634	0.788407806
YALI1_A08468g	YALI0A08580g	0.106373121	0.6751854	-0.186775076	0.329961342	-0.189572979	0.299499211
YALI1_A08502g	YALI0A08646g	0.020731702	0.877218788	-0.063938715	0.51201905	-0.024593584	0.824425519
YALI1_A08512g	YALI0A08668g	0.023701287	0.880901746	0.075923581	0.5183487	0.051126737	0.668427842
YALI1_A08532g	NA	-0.250013533	0.675561623	1.00265485	0.018685026	0.501073439	0.237541126
YALI1_A08546g	YALI0A08734g	0.000317673	0.998891113	0.058185867	0.798622684	0.021380114	0.929964758
YALI1_A08672g	YALI0A08998g	0.561865958	0.368749207	-0.052874242	0.940618004	-0.256394935	0.655857141
YALI1_A08729g	YALI0A09020g	-0.25437336	0.164558828	0.331556604	0.030797293	0.322752457	0.031729675
YALI1_A08759g	NA	0.279340158	0.199998558	-0.175038267	0.400896091	-0.232449468	0.214214016
YALI1_A08781g	YALI0A09042g	-0.066613858	0.532628709	0.048193484	0.634295255	0.056868872	0.545218143
YALI1_A08787g	YALI0A09064g	-0.138128887	0.322960571	0.163914894	0.176989521	0.156452772	0.185434189
YALI1_A08821g	NA	0.127827139	0.728323876	-0.165824634	0.583489834	-0.272017007	0.287153209
YALI1_A08828g	YALI0A09086g	0.011226849	0.945426936	0.037016836	0.792691261	0.017796888	0.898789322
YALI1_A08835g	NA	0.203243799	0.311661806	-0.197345943	0.25418396	-0.236484872	0.134001435
YALI1_A08856g	YALI0A09108g	0.036323331	0.83386318	-0.044472488	0.765447934	-0.040126693	0.778515522
YALI1_A08901g	YALI0A09196g	-0.192211153	0.804314549	0.066382294	0.929863381	0.051711324	0.942290535
YALI1_A08931g	NA	-0.092841711	0.852167425	0.009149312	0.982634149	0.119071666	0.762375325
YALI1_A08934g	NA	0.171615284	0.703978011	-0.215632649	0.549102888	-0.081289139	0.838797593
YALI1_A08941g	NA	0.745871206	0.135572317	-0.587524462	0.173685182	-0.548707035	0.198035006
YALI1_A08981g	YALI0A09262g	-0.616555751	0.419721333	0.618795513	0.368854187	0.636854521	0.315944482
YALI1_A09010g	YALI0A09284g	0.143524463	0.301390045	-0.093320606	0.495944092	-0.088442406	0.497983034
YALI1_A09021g	NA	-0.189658136	0.699104778	-0.441133406	0.185969801	-0.005182646	0.993159092
YALI1_A09064g	YALI0A09383g	-0.078633381	0.798735185	-0.104654009	0.684906704	-0.031751386	0.914539064
YALI1_A09100g	YALI0A09405g	0.037870309	0.843542529	0.03749638	0.827234585	-0.003158804	0.986024467
YALI1_A09121g	YALI0A09427g	-0.098366412	0.422867806	0.083810222	0.462676279	0.105719866	0.297610739
YALI1_A09139g	YALI0A09438g	0.30302522	0.191042312	-0.408584627	0.023534669	-0.339087194	0.068645667
YALI1_A09166g	YALI0A09449g	0.163756807	0.390864976	-0.113329916	0.51513655	-0.075467327	0.676846387
YALI1_A09218g	YALI0A09537g	0.065827267	0.670423739	-0.070893719	0.584185662	-0.092495317	0.428192431
YALI1_A09325g	YALI0A09559g	-0.344467667	0.102382451	0.0635145	0.81326612	0.279609723	0.128648216
YALI1_A09372g	YALI0A09592g	0.01168412	0.93262371	-0.061991689	0.537362028	-0.039580414	0.714565331
YALI1_A09397g	YALI0A09614g	0.240724416	0.712908665	-0.411668242	0.384847487	-0.229368728	0.667725289
YALI1_A09408g	YALI0A09636g	0.233712944	0.242783258	-0.265881585	0.115583184	-0.244671113	0.140040833
YALI1_A09422g	YALI0A09658g	0.005032038	0.971836091	-0.061334258	0.529453085	-0.011198246	0.927011904
YALI1_A09444g	YALI0A09680g	0.126311351	0.285514565	-0.116757368	0.272103271	-0.120365476	0.236204665
YALI1_A09467g	YALI0A09702g	0.139468318	0.179996939	-0.153961225	0.08423097	-0.13461356	0.136801242
YALI1_A09522g	YALI0A09724g	0.12946283	0.71749448	-0.340565118	0.184280466	-0.223634571	0.408512155
YALI1_A09524g	YALI0A09746g	0.181315845	0.613764165	-0.403966682	0.111912505	-0.350332931	0.165847364
YALI1_A09553g	YALI0A09768g	0.373783198	0.260473798	-0.664539685	0.009376301	-0.592022508	0.029075697
YALI1_A09576g	YALI0A09790g	0.024775223	0.881041304	-0.171210184	0.095268305	-0.036775184	0.789500329
YALI1_A09593g	YALI0A09812g	-0.02645025	0.887691361	0.165020654	0.190682898	0.118382252	0.359673275
YALI1_A09626g	YALI0A09834g	0.103426078	0.421964207	-0.176561994	0.074339271	-0.098451113	0.373272337
YALI1_A09638g	YALI0A09845g	-0.064357514	0.681211145	0.039490608	0.795335089	0.05378162	0.69736554
YALI1_A09654g	NA	0.115379791	0.539401282	-0.115957924	0.479009167	-0.09876878	0.539137914
YALI1_A09694g	YALI0A09856g	-0.108627245	0.27321947	0.101389608	0.268794248	0.136784372	0.101380676
YALI1_A09741g	YALI0A09878g	0.038446894	0.758220843	0.05221321	0.616135823	0.034466948	0.751343125
YALI1_A09766g	YALI0A09900g	0.012555935	0.935208995	-0.028330635	0.831817326	-0.013186885	0.926418571
YALI1_A09776g	NA	0.026141453	0.942489241	0.160163996	0.565701964	0.051959286	0.862886678
YALI1_A09787g	NA	-0.18606264	0.50044233	0.321357325	0.157161829	0.182072741	0.432065755
YALI1_A09789g	NA	-0.004998592	0.988814452	-0.018897249	0.958774021	0.023660459	0.945173064
YALI1_A09798g	YALI0A09922g	0.231024504	0.354213826	-0.336485752	0.10354196	-0.281900623	0.188549783
YALI1_A09856g	YALI0A09988g	0.004389808	0.972796338	-0.015523483	0.884124345	0.012243798	0.906756048
YALI1_A09893g	YALI0A10010g	-0.059368932	0.744070493	-0.040530575	0.815038599	0.034866929	0.835829012
YALI1_A09911g	YALI0A10032g	0.11679005	0.249740456	-0.123400468	0.160475972	-0.098004666	0.273803343
YALI1_A09919t	YALI0A10054t	0.267511033	0.629126028	-0.262352345	0.571855134	-0.259920511	0.558127253
YALI1_A09939g	YALI0A10076g	0.080886594	0.379327553	-0.115480812	0.125424545	-0.061442363	0.472360312
YALI1_A09949g	YALI0A10098g	0.03932393	0.740054087	0.025419159	0.822843372	-0.007306669	0.950901579
YALI1_A09996g	YALI0A10120g	0.090804632	0.618659272	-0.120957221	0.408717245	-0.018377804	0.920353304
YALI1_A10015g	YALI0A10142g	0.16263643	0.178858466	-0.140733887	0.200225654	-0.133759951	0.211697436
YALI1_A10022g	YALI0A10164g	0.065945509	0.629126028	0.060925619	0.608198251	0.05480558	0.634408337
YALI1_A10039g	YALI0A10186g	-0.024369649	0.877243079	-0.011541732	0.93714055	0.059013742	0.605686661
YALI1_A10105g	YALI0A10230g	-0.122740883	0.258883971	0.043642487	0.723417556	0.103027605	0.297879848
YALI1_A10143g	YALI0A10252g	0.122547128	0.654147077	-0.220902703	0.274702658	-0.179948209	0.378957484
YALI1_A10146g	YALI0A10274g	0.178139216	0.189555541	-0.15706416	0.205215308	-0.199649457	0.070980108
YALI1_A10199g	YALI0A10296g	-0.008371241	0.980410036	0.288749479	0.171177846	0.236991697	0.245333404
YALI1_A10254g	YALI0A10310g	0.080637765	0.637738988	-0.187820171	0.124413984	-0.145206143	0.248084232
YALI1_A10267g	YALI0A10318g	0.018496178	0.874907527	-0.034054605	0.71568069	-0.004207642	0.969347551
YALI1_A10318g	YALI0A10362g	-0.121315363	0.430852133	0.102931333	0.465328641	0.118393974	0.38553645
YALI1_A10448g	NA	0.181232294	0.540814833	-0.263594506	0.254989731	-0.159317828	0.515365406
YALI1_A10468g	YALI0A10483g	-0.198672508	0.322082857	-0.028326877	0.910682791	0.107150151	0.580216263
YALI1_A10473g	NA	-0.203650718	0.406722644	0.00311112	0.99066816	0.085866864	0.725044125
YALI1_A10510g	YALI0A10549g	-0.019718273	0.878225148	0.050675652	0.605571194	0.038079151	0.705364958
YALI1_A10529g	YALI0A10571g	0.074635188	0.76761901	0.09198988	0.67257996	-0.074999611	0.721694705
YALI1_A10565g	YALI0A10593g	0.1722873	0.726890306	-0.046568749	0.922367355	-0.052453209	0.908453076
YALI1_A10619g	YALI0A10615g	-0.043756638	0.621458432	0.062627368	0.374694329	0.03825444	0.622091364
YALI1_A10672g	YALI0A10637g	0.019274935	0.904044644	0.113346986	0.292519258	0.026705544	0.84388341
YALI1_A10708g	YALI0A10659g	-0.07770713	0.810836738	-0.013599332	0.964194402	-0.013311766	0.968175741
YALI1_A10784g	YALI0A10681g	-0.098279099	0.70989364	0.26865566	0.163182155	0.141336992	0.497018762
YALI1_A10796g	NA	-0.186148566	0.509405211	0.433838659	0.039465003	0.234095128	0.294485856
YALI1_A10798g	YALI0A10703g	-0.071042475	0.760616136	0.178176669	0.309183745	0.086846023	0.649056531
YALI1_A10827g	YALI0A10725g	-0.115641063	0.700304109	0.216014453	0.337113417	0.093473088	0.729007406
YALI1_A10857g	YALI0A10747g	-0.180844622	0.286419657	0.133617418	0.402308483	0.218248757	0.128835259
YALI1_A10883g	YALI0A10769g	-0.051610921	0.914125148	0.136228534	0.718070919	0.199146079	0.537560197
YALI1_A10907g	YALI0A10813g	-0.089829491	0.516892928	0.110888197	0.344771574	0.086854383	0.459375682
YALI1_A10934g	YALI0A10879g	0.016319795	0.906923012	-0.019133127	0.878539478	-0.008749652	0.946423242
YALI1_A11043g	YALI0A10945g	0.088209366	0.935208995	-0.044979307	0.958774021	0.0810402	0.928271962
YALI1_A11068g	NA	0.154660292	0.771538331	-0.484597147	0.157680666	-0.343609548	0.342944293
YALI1_A11079g	YALI0A10967g	0.476643526	0.109829763	-0.100615491	0.771575116	-0.252398425	0.345421418
YALI1_A11114g	YALI0A10989g	0.023783679	0.900950274	0.118772111	0.361712319	0.052376538	0.720883102
YALI1_A11165g	NA	0.241006543	0.737089938	-0.112529773	0.86566866	-0.204508204	0.723974672
YALI1_A11182g	YALI0A11077g	-0.017551577	0.960217364	-0.033501727	0.91243234	-0.002885996	0.993963236
YALI1_A11218g	YALI0A11099g	0.105921098	0.379436124	-0.160487874	0.09149163	-0.125416202	0.203109723
YALI1_A11231g	YALI0A11121g	0.041315748	0.811397912	0.101011955	0.424336435	0.04744388	0.734391304
YALI1_A11258g	YALI0A11143g	-0.142255328	0.324346788	0.257930363	0.018013467	0.13303639	0.300800441
YALI1_A11270g	YALI0A11157g	-0.077022567	0.506416107	0.095147053	0.320272671	0.079282736	0.432065755
YALI1_A11293g	NA	-0.030293499	0.913921822	-0.004718773	0.983885321	0.050349389	0.81861466
YALI1_A11303g	NA	0.053513438	0.859191679	-0.188439844	0.355863423	0.020299263	0.938523515
YALI1_A11341g	YALI0A11198g	-0.157641062	0.435271778	0.072935061	0.736178215	0.118024192	0.516186259
YALI1_A11345g	NA	0.081004705	0.877243079	-0.230812101	0.554977831	-0.063963438	0.883378135
YALI1_A11355g	YALI0A11220g	0.251139504	0.35318698	-0.206505333	0.38696105	-0.150106677	0.539413648
YALI1_A11415g	YALI0A11407g	0.076529027	0.739020383	-0.095013009	0.625112212	-0.151112945	0.372613669
YALI1_A11439g	YALI0A11473g	-1.151976363	0.02382951	0.800881689	0.24268683	1.291691116	0.002543499
YALI1_A11500g	YALI0A11517g	0.09566939	0.80994955	-0.349974181	0.187526112	-0.235951886	0.394912784
YALI1_A11506g	YALI0A11539g	-0.029284677	0.912005626	-0.065015192	0.769249384	0.015628891	0.946780685
YALI1_A11588g	NA	0.413650322	0.518321523	0.110489835	0.861754255	0.12071141	0.842462582
YALI1_A11612g	YALI0A11561g	-0.13437096	0.541524198	0.171675789	0.357642793	0.172266034	0.315690552
YALI1_A11622g	NA	0.170820179	0.631614844	-0.365209699	0.141722673	-0.171369001	0.540968199
YALI1_A11643g	NA	0.12827409	0.798725864	-0.173490017	0.630112041	-0.094470312	0.812808064
YALI1_A11654g	YALI0A11605g	0.011331019	0.974619038	-0.133871812	0.558857996	0.003817179	0.990917172
YALI1_A11797g	YALI0A11649g	-0.107981447	0.872581398	0.15027131	0.780425813	0.219231469	0.643515857
YALI1_A11821g	NA	0.140060965	0.629126028	-0.350905115	0.069560941	-0.173218684	0.428734674
YALI1_A11833g	NA	-0.051346056	0.84627636	-0.081066221	0.70550624	0.110910472	0.556933399
YALI1_A11854g	YALI0A11671g	-0.209589152	0.150181017	0.095622376	0.546689632	0.241543622	0.038018807
YALI1_A11876g	NA	0.301858301	0.282144603	-0.052546498	0.874643378	-0.099151912	0.725044125
YALI1_A11880r	YALI0A11693r	0.039540661	0.929508933	-0.018511843	0.961812853	0.122023741	0.711725147
YALI1_A11905g	YALI0A11737g	-0.27402832	0.479708336	-0.119048255	0.798073806	0.175058428	0.631628021
YALI1_A12037g	YALI0A11781g	0.041520778	0.930145419	0.089600664	0.851447597	0.024326403	0.954099444
YALI1_A12067g	YALI0A11803g	-0.613600702	0.46175998	1.037258229	0.095916267	0.732081139	0.275729905
YALI1_A12099g	YALI0A11869g	0.01848121	0.878225148	-0.055420957	0.534487577	-0.053033243	0.540015069
YALI1_A12138g	NA	0.281876353	0.330266226	-0.224015741	0.372845568	-0.187984364	0.458760806
YALI1_A12152g	YALI0A11891g	0.285791237	0.527038945	-0.202444273	0.601556335	-0.207060838	0.581079183
YALI1_A12167g	YALI0A11935g	0.092372976	0.571199559	-0.122862315	0.345727812	-0.04466116	0.768986452
YALI1_A12225g	YALI0A12001g	-0.076773358	0.74745594	0.059500251	0.795218092	0.057520491	0.78924548
YALI1_A12245g	YALI0A12023g	-0.051136001	0.746837124	0.048615056	0.736178215	0.008933681	0.954928536
YALI1_A12284g	YALI0A12045g	-0.056370982	0.67875565	0.111491291	0.27618432	0.059922313	0.593886787
YALI1_A12294g	NA	0.128753232	0.530379285	-0.007485735	0.971993222	-0.069668242	0.710758231
YALI1_A12302g	YALI0A12067g	0.138736541	0.66449082	-0.237691012	0.331814717	-0.280371025	0.216465837
YALI1_A12356g	YALI0A12111g	0.170872087	0.30066418	-0.106557727	0.515864064	-0.152742033	0.285768704
YALI1_A12403g	YALI0A12133g	0.036694691	0.903402659	-0.088586489	0.721338987	-0.123535173	0.574941308
YALI1_A12411g	YALI0A12155g	-0.007386736	0.9808571	-0.062996433	0.80826606	-0.086150437	0.71179339
YALI1_A12437g	YALI0A12177g	-0.299258143	0.255544416	0.171451979	0.511771456	0.179331092	0.484523106
YALI1_A12445g	YALI0A12199g	-0.092548262	0.737445865	0.213803235	0.322924312	0.052692839	0.832923345
YALI1_A12465g	YALI0A12221g	-0.141260733	0.781027397	-0.257796929	0.530320789	-0.111318009	0.797883164
YALI1_A12475g	YALI0A12243g	-0.272117286	0.349887528	-0.250865649	0.356601369	0.001388347	0.996954906
YALI1_A12492g	YALI0A12265g	0.041945619	0.925025281	-0.252521798	0.414817118	-0.258337297	0.368968808
YALI1_A12502g	YALI0A12287g	-0.031581688	0.744070493	0.034693452	0.679459075	0.031244923	0.704075121
YALI1_A12540g	YALI0A12353g	0.008746265	0.988324001	0.487655444	0.225162134	0.287347616	0.487925585
YALI1_A12601g	YALI0A12419g	0.198088482	0.818669994	0.039357418	0.960822685	-0.128402054	0.862005222
YALI1_A12617g	YALI0A12441g	0.045493134	0.862872906	-0.076238055	0.714916521	0.044238133	0.835975041
YALI1_A12638g	YALI0A12507g	0.20014639	0.500782608	-0.261706638	0.273118345	-0.282442378	0.209910728
YALI1_A12688g	YALI0A12573g	-0.044825451	0.892582724	-0.042056607	0.89342652	0.024036224	0.935768643
YALI1_A12729g	YALI0A12617g	-0.069692325	0.67875565	0.139671413	0.274883521	0.094125433	0.467016403
YALI1_A12756g	YALI0A12683g	-0.274451251	0.448548006	-0.252125098	0.447110671	0.087532639	0.814330999
YALI1_A12772g	YALI0A12705g	0.021347779	0.959402999	-0.435727614	0.06372099	-0.228240543	0.384063381
YALI1_A12929g	YALI0A12925g	-3.764427974	0.000455898	0.832663944	0.782858139	3.655543429	0.001905386
YALI1_A12989g	YALI0A12969g	-0.072392403	0.809963206	-0.159287572	0.491724773	-0.044097521	0.868293331
YALI1_A13019g	YALI0A13013g	-0.424637413	0.683725243	0.643210885	0.398980051	0.603175592	0.427337353
YALI1_A13041g	YALI0A13035g	0.1671653	0.530924035	-0.184650604	0.420638167	-0.224763007	0.285767002
YALI1_A13046g	YALI0A13057g	0.009887552	0.965994001	-0.08661137	0.60832948	-0.047957129	0.789860174
YALI1_A13095g	YALI0A13079g	0.088633601	0.699185744	0.078124889	0.699301929	-0.004876085	0.983235258
YALI1_A13100g	YALI0A13101g	-0.091925806	0.322082857	0.122812341	0.110852348	0.095446266	0.244229496
YALI1_A13131g	NA	0.253658669	0.409540679	-0.079034034	0.816686624	-0.14165127	0.61345684
YALI1_A13148g	NA	0.202998578	0.451937001	-0.29443566	0.161392298	-0.151240237	0.513501003
YALI1_A13200g	NA	-0.147401793	0.572558722	0.049189094	0.86644987	0.204785684	0.299499211
YALI1_A13224g	NA	-0.056607099	0.894823182	-0.184256291	0.586310781	0.003429893	0.994585292
YALI1_A13227g	NA	0.049756165	0.93621493	-0.418431005	0.319643288	-0.150697516	0.755601497
YALI1_A13236g	NA	0.251693798	0.673072579	-0.463145969	0.279718499	-0.298220331	0.512445033
YALI1_A13330g	NA	0.628686817	0.150181017	-0.780757277	0.009332582	-0.758789341	0.0118584
YALI1_A13334g	NA	0.393291344	0.215769796	-0.58873985	0.006107178	-0.586594404	0.005217423
YALI1_A13349g	YALI0A13277g	0.08296133	0.558368614	-0.056366424	0.674259539	-0.049914066	0.705468511
YALI1_A13383g	YALI0A13299g	-0.123022338	0.437745052	0.225643186	0.065241898	0.089729796	0.545388944
YALI1_A13392g	NA	-0.027931185	0.915104363	-0.025296314	0.913708657	-0.036310661	0.864149858
YALI1_A13397g	NA	0.06596667	0.756302555	-0.104174263	0.536315818	-0.098052094	0.543271147
YALI1_A13412g	YALI0A13321g	-0.026318803	0.84199398	0.028506825	0.806640343	0.024038985	0.831125454
YALI1_A13454g	YALI0A13387g	-0.073856214	0.76314118	0.044346156	0.853408344	0.034571267	0.883389117
YALI1_A13508g	YALI0A13497g	-0.112066672	0.958320134	-0.984420837	0.549352219	0.2504562	0.885725473
YALI1_A13555g	YALI0A13519g	-0.054321644	0.616329939	0.067256944	0.463856893	0.078274009	0.361707133
YALI1_A13566g	YALI0A13541g	0.036799965	0.888845411	-0.003438141	0.988205249	-0.077913161	0.711155259
YALI1_A13591g	NA	0.380197047	0.18166039	-0.586189558	0.00395651	-0.483029282	0.02539535
YALI1_A13593g	NA	0.171821427	0.527679552	-0.363919613	0.055141604	-0.219372472	0.294485856
YALI1_A13596g	YALI0A13563g	0.202266234	0.341511462	-0.16701805	0.392813156	-0.226425318	0.192424229
YALI1_A13637g	NA	-0.08106778	0.84627636	-0.136398051	0.686857293	0.108811512	0.741396819
YALI1_A13649g	YALI0A13585g	-0.05494926	0.797262038	-0.040651144	0.836954066	0.001677507	0.995209224
YALI1_A13713g	YALI0A13673g	-0.021003046	0.879606874	0.011451322	0.931128211	0.069748381	0.461084255
YALI1_A13737g	NA	0.007987878	0.983190717	-0.157671562	0.566304556	-0.135498484	0.605686661
YALI1_A13749g	NA	-0.087689686	0.822754098	-0.074574181	0.836354907	0.016843716	0.963288273
YALI1_A13903g	NA	0.258058064	0.391578169	-0.38154732	0.058424802	-0.331119313	0.124591815
YALI1_A13982r	YALI0A14113r	0.204564721	0.463047659	-0.168884569	0.494300397	-0.093775694	0.721694705
YALI1_A13994g	YALI0A14157g	0.06198496	0.609949411	-0.016621498	0.897359707	-0.019203114	0.871212789
YALI1_A14020g	NA	-0.135757495	0.640681689	-0.128684545	0.611437493	-0.109902282	0.653312484
YALI1_A14024g	YALI0A14212g	-0.011722121	0.93196156	-0.014493609	0.906500537	0.038846739	0.704075121
YALI1_A14079g	YALI0A14234g	0.460815476	0.540543048	0.041442887	0.960822685	-0.329973358	0.609467947
YALI1_A14099g	YALI0A14256g	-0.074033301	0.710710435	0.136908058	0.384028332	0.152447029	0.294485856
YALI1_A14109g	NA	-0.038030986	0.852683689	0.089021025	0.571233821	0.076492079	0.608662826
YALI1_A14127g	NA	0.012166529	0.977458783	-0.080868654	0.801667623	0.099527971	0.730337224
YALI1_A14131g	NA	0.523061398	0.102110781	-0.355121001	0.208626366	-0.393901457	0.132868287
YALI1_A14141g	NA	-0.210682255	0.40657952	-0.058541472	0.841925111	0.169239181	0.441779888
YALI1_A14150g	NA	-0.216989661	0.509405211	0.187948208	0.54269167	0.232335493	0.381243978
YALI1_A14162g	YALI0A14322g	-0.227340145	0.425494183	0.209192266	0.433455161	0.197205888	0.419169574
YALI1_A14189g	YALI0A14366g	-0.013621413	0.941509548	0.137904589	0.255920965	0.061201345	0.650304975
YALI1_A14199g	YALI0A14388g	-0.056987251	0.539509191	0.019562303	0.844904015	0.045779931	0.573528571
YALI1_A14228g	YALI0A14454g	-0.04989232	0.738018876	0.064367625	0.610124985	0.087661898	0.43969749
YALI1_A14259g	YALI0A14476g	-0.056966369	0.771435701	0.264024616	0.033177477	0.160718154	0.231594347
YALI1_A14274g	NA	0.037681549	0.930145419	0.274105156	0.332556188	0.055288971	0.871538191
YALI1_A14287g	YALI0A14498g	0.096973241	0.430509335	-0.056351142	0.648765089	-0.09768639	0.361293129
YALI1_A14292g	NA	-0.155021648	0.45649013	0.226236851	0.196444913	0.253909683	0.107978751
YALI1_A14305g	YALI0A14520g	0.087209343	0.629126028	-0.000675008	0.995898872	-0.074649033	0.616346434
YALI1_A14345g	YALI0A14542g	-0.173674956	0.107234807	0.173497119	0.059742475	0.153573966	0.115195732
YALI1_A14368g	YALI0A14564g	0.039069906	0.824407022	0.046769083	0.761654374	-0.012540265	0.937912816
YALI1_A14377g	NA	0.318258244	0.246582418	-0.484898791	0.015231106	-0.244722098	0.297879848
YALI1_A14390g	YALI0A14586g	-0.105110362	0.269378277	0.137012378	0.087981201	0.088748987	0.308858948
YALI1_A14414g	NA	0.09915785	0.720745133	0.011675697	0.965451161	-0.028504462	0.914539064
YALI1_A14430g	NA	0.179297941	0.547170212	-0.1091989	0.699429514	-0.2402905	0.285378141
YALI1_A14458g	NA	0.261956827	0.384194843	-0.16105164	0.549169722	-0.21836774	0.375223028
YALI1_A14510g	NA	0.117971443	0.637726344	-0.253976071	0.146545001	-0.180229149	0.322250021
YALI1_A14513g	YALI0A14608g	-0.105909464	0.29434578	0.094718331	0.309183745	0.10330022	0.245333404
YALI1_A14568g	YALI0A14630g	-0.042205314	0.823819175	-0.037969953	0.82524789	0.005733197	0.975277896
YALI1_A14658g	YALI0A14707g	-0.199547628	0.169120967	0.239585765	0.054313192	0.23753964	0.042253108
YALI1_A14670g	YALI0A14740g	-0.108109595	0.432199244	0.113690204	0.351144249	0.09736403	0.413856861
YALI1_A14691g	NA	0.054244595	0.806812612	-0.04710936	0.811155743	0.031793961	0.869034756
YALI1_A14703g	YALI0A14762g	-0.016767736	0.906891758	0.006868514	0.958198344	0.00305624	0.981391621
YALI1_A14721g	YALI0A14784g	-0.185382444	0.243451912	0.248020765	0.052997827	0.182601297	0.192939356
YALI1_A14736g	YALI0A14806g	-0.173210411	0.150181017	0.150088815	0.169680488	0.163727262	0.125005986
YALI1_A14783g	YALI0A14839g	0.085183508	0.618918876	-0.200617034	0.10507771	-0.143823668	0.276601458
YALI1_A14826g	YALI0A14861g	-0.12294295	0.667753787	0.413940842	0.018845157	0.295169978	0.115195732
YALI1_A14882g	YALI0A14883g	0.077689634	0.900950274	0.11814004	0.818557086	-0.080679651	0.873954209
YALI1_A14922g	YALI0A14905g	-0.407581954	0.29549038	0.564189209	0.081490924	0.432452725	0.182119563
YALI1_A15017t	YALI0A14971g	0.303945833	0.558901841	-0.644649935	0.076027409	-0.542564785	0.146196175
YALI1_A15040t	YALI0A14971g	-0.252598943	0.58096436	-0.040721868	0.93773416	0.03124516	0.94949209
YALI1_A15045g	YALI0A15026g	0.015846993	0.979989212	-0.483581355	0.185969801	-0.175044077	0.683130684
YALI1_A15053g	YALI0A15026g	0.185487194	0.616904513	-0.444747743	0.080051964	-0.347728131	0.182321611
YALI1_A15073g	YALI0A15059g	0.027981069	0.87030234	-0.005565267	0.969352574	0.036108716	0.789907395
YALI1_A15079g	YALI0A15081g	0.050548517	0.80184951	0.07219794	0.661821955	0.005531581	0.977623104
YALI1_A15105g	YALI0A15103g	-0.040670916	0.925025281	0.167368305	0.606625198	0.107697701	0.749383169
YALI1_A15132g	YALI0A15125g	-0.341735879	0.218196729	0.451537581	0.058741015	0.404152207	0.068268447
YALI1_A15172g	NA	0.043841217	0.839766045	0.062861697	0.727071773	0.036630398	0.837983922
YALI1_A15178g	NA	0.036495939	0.937522764	0.372699752	0.233702336	0.037052493	0.926698233
YALI1_A15185g	NA	0.087401257	0.71223885	-0.077554132	0.711832042	-0.034144666	0.875298675
YALI1_A15192g	NA	-0.031771395	0.9108163	-0.086566093	0.694977019	0.01698539	0.945408808
YALI1_A15227g	YALI0A15147g	0.018685335	0.94539607	-0.021586036	0.933027379	-0.039773751	0.862886678
YALI1_A15349g	YALI0A15257g	-0.242593038	0.265468593	0.245140966	0.217465968	0.209461377	0.288134952
YALI1_A15366g	NA	0.095114024	0.879647588	-0.051070451	0.931128211	-0.175096164	0.714626061
YALI1_A15373g	NA	0.489387814	0.207700413	-0.612243923	0.040492488	-0.46340886	0.143975656
YALI1_A15414g	YALI0A15345g	-0.123114422	0.288384129	0.11028639	0.303447412	0.143171907	0.129473357
YALI1_A15437g	NA	0.092165687	0.706494712	-0.083758711	0.698326762	-0.063382093	0.765057988
YALI1_A15482g	YALI0A15400g	0.158760835	0.365013646	-0.105621741	0.522736948	-0.167130294	0.242568231
YALI1_A15497g	YALI0A15422g	0.01478582	0.935382546	0.071309057	0.60522075	0.042261978	0.770656353
YALI1_A15507g	YALI0A15433g	0.094308073	0.713286026	0.07411277	0.756132133	0.055952411	0.806590378
YALI1_A15515g	YALI0A15444g	0.198577145	0.191042312	-0.189654981	0.15018372	-0.173675583	0.177306243
YALI1_A15523g	NA	0.172984128	0.513828919	-0.297825546	0.132642726	-0.154513606	0.479830749
YALI1_A15528g	YALI0A15466g	0.102587899	0.660227401	0.113226965	0.556105393	0.061872862	0.76020005
YALI1_A15544g	YALI0A15488g	0.013460479	0.970957037	-0.08062741	0.772188034	0.030579001	0.916073512
YALI1_A15584g	YALI0A15554g	-0.091542007	0.404358065	0.083024812	0.40746641	0.119465912	0.170164256
YALI1_A15666g	YALI0A15598g	-0.572811174	0.438781627	0.98521958	0.092995113	0.63629741	0.291352554
YALI1_A15720g	YALI0A15686g	-0.054700235	0.610441132	0.092619718	0.264461843	0.048117717	0.608662826
YALI1_A15722g	YALI0A15708g	0.144369762	0.395372641	-0.251853079	0.053498817	-0.22367888	0.086801546
YALI1_A15766g	YALI0A15752g	1.141350221	0.08922282	-0.693281333	0.225667699	-0.822319226	0.128659337
YALI1_A15784g	YALI0A15774g	-0.05340648	0.67262582	0.089148694	0.361195689	0.079590178	0.407080317
YALI1_A15846g	YALI0A15884g	0.022478935	0.922626074	-0.063269022	0.728419082	-0.069520108	0.676925005
YALI1_A15863g	YALI0A15906g	0.228980146	0.578224737	0.072517877	0.863918227	-0.125355526	0.724217191
YALI1_A15879g	YALI0A15950g	-0.134328454	0.268855108	0.176802155	0.086239298	0.126955099	0.245601821
YALI1_A15925g	YALI0A15972g	-0.092283232	0.431821217	0.112387581	0.262506475	0.066882737	0.547293485
YALI1_A15978g	YALI0A16038g	0.198634675	0.311661806	-0.253463308	0.116805075	-0.221801019	0.165847364
YALI1_A16004g	YALI0A16060g	-0.046120462	0.798947484	0.117964787	0.370316866	0.077877628	0.571284004
YALI1_A16020g	NA	0.279018944	0.215885879	-0.165314966	0.444805359	-0.145776178	0.484107457
YALI1_A16028g	YALI0A16082g	0.094119364	0.721338186	-0.066831055	0.788908323	0.030324616	0.90420837
YALI1_A16031g	NA	0.039911555	0.938984631	-0.079240618	0.866429925	0.142279961	0.715491535
YALI1_A16068r	YALI0A16126r	-0.526148104	0.224820105	0.129459374	0.810559569	0.392433538	0.31782578
YALI1_A16075g	YALI0A16148g	-0.397318452	0.207700413	0.161635812	0.663654912	0.392383621	0.143625601
YALI1_A16095g	YALI0A16170g	-0.031448043	0.754472087	0.015834271	0.874130206	0.047004209	0.555335469
YALI1_A16121g	YALI0A16214g	-0.183799667	0.225865076	0.091192282	0.563419991	0.119754879	0.405145239
YALI1_A16136g	NA	0.401772354	0.110965145	-0.436458657	0.023549943	-0.408137262	0.036953272
YALI1_A16145g	NA	0.227729287	0.530969393	-0.288817749	0.332686013	-0.336637571	0.214938926
YALI1_A16178g	NA	0.030147086	0.941509548	-0.317639882	0.235733294	-0.181583487	0.524243571
YALI1_A16215g	YALI0A16291g	-0.108341278	0.293141334	0.153059436	0.075963537	0.133064202	0.126350592
YALI1_A16274r	YALI0A16335r	0.292182871	0.681211145	0.350747609	0.600647996	0.016731402	0.981466796
YALI1_A16292g	YALI0A16379g	-0.125722713	0.659524682	0.149927655	0.526444037	0.070163329	0.79426842
YALI1_A16392g	YALI0A16423g	-0.181428047	0.684694016	0.127665725	0.779832369	0.17869171	0.630966305
YALI1_A16422g	YALI0A16445g	-0.042264262	0.967699786	0.049307945	0.953752958	-0.024447162	0.9785167
YALI1_A16461g	YALI0A16467g	0.134830206	0.396717648	0.004182355	0.980008943	-0.026948583	0.874057453
YALI1_A16466g	YALI0A16489g	0.106974058	0.419166969	-0.17917342	0.079889062	-0.117081044	0.288134952
YALI1_A16485g	YALI0A16511g	0.215086955	0.680382997	-0.236604673	0.578385142	-0.314713515	0.407506251
YALI1_A16496g	NA	-0.088994333	0.710038991	0.305729511	0.059715224	0.176157744	0.303024512
YALI1_A16501g	YALI0A16566g	-0.072557868	0.692229646	0.144684457	0.294953665	0.154305719	0.224997692
YALI1_A16509g	YALI0A16588g	-0.074742659	0.363734542	0.090570885	0.197757154	0.069877515	0.333358224
YALI1_A16642g	YALI0A16698g	0.023547503	0.87030234	0.024987445	0.844904015	0.002737227	0.98349913
YALI1_A16681g	YALI0A16720g	-0.243374407	0.19736866	0.026355226	0.914762836	0.213252487	0.198476352
YALI1_A16745g	YALI0A16775g	0.18811443	0.203449797	-0.160771422	0.242194425	-0.207113385	0.095048634
YALI1_A16770g	YALI0A16797g	-0.052494654	0.69522968	0.134258945	0.155025989	0.061455961	0.577086204
YALI1_A16787g	YALI0A16819g	-0.042455639	0.757378694	0.058098734	0.608807064	0.06654155	0.528188716
YALI1_A16808g	NA	-0.31990497	0.511935282	-0.356710372	0.388738362	-0.178569836	0.699138019
YALI1_A16809g	NA	0.287501261	0.653350913	-0.386958649	0.43258812	-0.501366088	0.264226649
YALI1_A16826g	NA	-0.066783576	0.813914524	0.095569962	0.687942987	0.053095758	0.823868612
YALI1_A16832g	NA	0.08993056	0.801232349	0.31568329	0.185422515	0.048633766	0.872284905
YALI1_A16843g	NA	-0.323492582	0.390307963	-0.022843383	0.961262088	0.40979776	0.166265397
YALI1_A16863g	NA	-0.00986428	0.991445724	-0.441878314	0.584219325	0.136664793	0.88068285
YALI1_A16891g	YALI0A16841g	-1.529493541	0.019479083	1.441324457	0.053939671	1.506307535	0.005612682
YALI1_A16918g	NA	-0.125479213	0.722416034	-0.016694278	0.965451161	0.011565876	0.975277896
YALI1_A16938g	NA	0.310055761	0.500189241	-0.1498337	0.756132133	-0.100167846	0.826634606
YALI1_A16944g	NA	0.288911791	0.356849054	-0.326318689	0.190130651	-0.281613534	0.261437024
YALI1_A16950g	NA	0.26415593	0.281901307	-0.15390531	0.531251832	-0.23621112	0.252457084
YALI1_A16952g	NA	0.082578975	0.858263508	-0.222969331	0.499875914	-0.138742013	0.688783378
YALI1_A16988g	YALI0A16863g	0.013636821	0.945372038	0.004575767	0.978579004	-0.045077723	0.771472733
YALI1_A16991g	NA	0.068593984	0.76263717	-0.290831801	0.036727888	-0.142414175	0.376301225
YALI1_A17085g	YALI0A17020g	-0.325106567	0.191042312	0.30020094	0.175898328	0.361167453	0.088798169
YALI1_A17103g	NA	0.049094668	0.854141514	-0.105832928	0.600647996	-0.109326573	0.559856199
YALI1_A17118g	YALI0A17039g	-0.047033952	0.859191679	-0.06090173	0.795218092	0.007341799	0.976533545
YALI1_A17123g	YALI0A17061g	0.146581304	0.643749091	-0.051005217	0.876061354	-0.1639568	0.510391005
YALI1_A17177g	YALI0A17127g	-0.169602226	0.170557943	0.218996423	0.02712052	0.214264048	0.036491028
YALI1_A17234g	YALI0A17149g	-0.420694616	0.108245953	0.336834885	0.171177846	0.388767335	0.076629266
YALI1_A17239g	NA	0.16955438	0.705563807	-0.004122264	0.991911091	-0.062159534	0.878469792
YALI1_A17289g	YALI0A17171g	-0.092136087	0.705563807	0.167591305	0.379489998	0.219728206	0.194285402
YALI1_A17320g	NA	0.147211715	0.757731588	-0.455122823	0.16069994	-0.3916671	0.224203021
YALI1_A17328g	YALI0A17193g	-0.055012439	0.923313502	-0.358025701	0.34813401	-0.185035289	0.653920651
YALI1_A17348g	YALI0A17215g	-0.008495815	0.986247144	-0.362203013	0.288803162	-0.185405342	0.614051632
YALI1_A17383g	YALI0A17237g	0.479541094	0.526854868	-0.30260456	0.658161834	-0.430630787	0.475241946
YALI1_A17419g	YALI0A17281g	0.076500347	0.813644422	-0.274425592	0.202682995	-0.150873658	0.523988987
YALI1_A17433g	YALI0A17292g	0.081327795	0.76648171	-0.143454791	0.511317534	-0.194599285	0.311692382
YALI1_A17450g	YALI0A17314g	0.115671133	0.478626691	-0.059193261	0.722088803	-0.111915586	0.414354369
YALI1_A17470g	YALI0A17336g	-0.068513389	0.737445865	0.018669099	0.931228233	0.054997067	0.758212096
YALI1_A17486g	YALI0A17358g	0.030002457	0.843542529	-0.065309119	0.571708417	0.024397577	0.850027227
YALI1_A17511g	YALI0A17380g	0.103481048	0.462536702	-0.062722601	0.6548465	-0.131973111	0.236206826
YALI1_A17515g	YALI0A17424g	-0.164827075	0.141797143	0.134767303	0.200729144	0.186939277	0.039753275
YALI1_A17546g	YALI0A17446g	-0.146172086	0.676268969	-0.079586935	0.829102697	0.099823096	0.752418155
YALI1_A17551g	NA	0.091717655	0.877756818	-0.475499337	0.21680544	-0.315382923	0.428731344
YALI1_A17570g	YALI0A17468g	-0.177264922	0.20597391	0.215449815	0.061527248	0.144486926	0.26689837
YALI1_A17583g	YALI0A17490g	0.233503548	0.264921559	-0.409756411	0.009376301	-0.317553966	0.056682075
YALI1_A17622g	YALI0A17512g	-0.190408863	0.132788164	0.256122871	0.01285945	0.179823325	0.097145097
YALI1_A17671g	YALI0A17578g	-0.00430188	0.983247367	-0.060232752	0.713161288	0.005961056	0.975204089
YALI1_A17720g	YALI0A17600g	-0.018974548	0.930145419	-0.048735911	0.788908323	0.025065001	0.889449803
YALI1_A17724g	NA	0.242236485	0.461446222	-0.269218537	0.340990232	-0.234249496	0.389693091
YALI1_A17749g	YALI0A17666g	0.17591357	0.708103291	-0.421128717	0.235733294	-0.237967445	0.515280839
YALI1_A17824g	YALI0A17776g	-0.081802587	0.613101991	0.055610747	0.718206967	0.103455642	0.409101619
YALI1_A17927g	YALI0A17809g	-0.031115076	0.783063868	0.107162067	0.16069994	0.064848022	0.432215159
YALI1_A17957g	YALI0A17831g	0.015986767	0.923313502	0.07590899	0.524685485	-0.034808163	0.795808114
YALI1_A18010g	YALI0A17853g	0.033372316	0.838622039	-0.160732852	0.118112904	-0.071282192	0.553253805
YALI1_A18036g	YALI0A17853g	0.009282518	0.964222838	-0.055899403	0.732359621	-0.102116178	0.456985068
YALI1_A18062g	YALI0A17875g	0.024387377	0.938170887	0.087261114	0.747642726	0.080669574	0.741031159
YALI1_A18076g	YALI0A17897g	0.241142189	0.812782472	0.557430268	0.53215798	-0.159676183	0.858387414
YALI1_A18133g	YALI0A17919g	-0.125135813	0.368458104	0.117353773	0.340990232	0.065237829	0.64540097
YALI1_A18166g	YALI0A17941g	-0.063331568	0.83437263	0.079046751	0.764672659	0.034875916	0.90067731
YALI1_A18188g	YALI0A17946g	0.315384151	0.058177156	-0.162339929	0.350373851	-0.311041017	0.029014577
YALI1_A18196g	NA	0.141794053	0.500189241	-0.26377015	0.084182757	-0.187115813	0.24323856
YALI1_A18204g	NA	-0.009894039	0.984293068	0.056694228	0.901189525	-0.014676385	0.975148999
YALI1_A18273g	YALI0A17985g	0.036720132	0.766347149	-0.074294381	0.442413217	-0.065941012	0.498746379
YALI1_A18286g	YALI0A18007g	-0.108932766	0.211847818	0.078924629	0.342978119	0.099777368	0.192325094
YALI1_A18315g	YALI0A18029g	0.040957319	0.809142464	-0.214208622	0.033119938	-0.099656414	0.395474824
YALI1_A18344g	YALI0A18062g	-0.242597586	0.058177156	0.249097235	0.02133266	0.235045955	0.036953272
YALI1_A18414g	YALI0A18139g	0.138748027	0.505077221	-0.274266266	0.071691575	-0.22529203	0.153256045
YALI1_A18426g	NA	-0.240112994	0.122013521	0.057354578	0.764793603	0.174474701	0.219653756
YALI1_A18439g	YALI0A18161g	-0.214044995	0.150101769	0.161675358	0.258765046	0.238149263	0.04941176
YALI1_A18443g	NA	-0.199674219	0.57795442	0.357815441	0.20454608	0.293607524	0.27915493
YALI1_A18451g	NA	0.031963275	0.892151995	-0.148635643	0.3388459	-0.051507616	0.783130877
YALI1_A18463g	NA	0.22164283	0.25448294	-0.259357172	0.091337527	-0.14405544	0.409101619
YALI1_A18466g	NA	0.136459568	0.653661072	-0.343797345	0.07838115	-0.152914976	0.512924991
YALI1_A18470g	NA	0.216207243	0.370508506	-0.387027219	0.023415411	-0.18179212	0.374850974
YALI1_A18514g	YALI0A18183g	-0.075282453	0.680382997	0.042765611	0.809958434	0.064176259	0.686864679
YALI1_A18557g	YALI0A18205g	-0.086745253	0.731693558	0.006256922	0.978958734	-0.000202242	0.998962278
YALI1_A18590g	NA	-0.291066387	0.218491675	0.121651378	0.676189195	0.299854113	0.132611326
YALI1_A18605g	NA	0.153195747	0.710710435	-0.471282241	0.071347507	-0.200070382	0.524243571
YALI1_A18622g	YALI0A18227g	0.166470882	0.286419657	-0.162568533	0.244135808	-0.200056268	0.1202155
YALI1_A18660g	YALI0A18249g	-0.047841584	0.859191679	0.013736825	0.957095361	-0.018987238	0.938053341
YALI1_A18671g	NA	0.22862095	0.419142464	-0.42662644	0.036429512	-0.299389681	0.170506872
YALI1_A18675g	NA	0.084718584	0.810836738	-0.252313776	0.296401875	-0.132756172	0.61345684
YALI1_A18692g	NA	-0.164408251	0.789627573	-0.112558645	0.838586769	0.100846047	0.851414936
YALI1_A18719g	NA	-0.004222931	0.993108961	0.540124573	0.199865209	0.175028228	0.715145359
YALI1_A18728g	NA	-0.073108549	0.835013793	-0.071110644	0.819569247	0.109832261	0.681234807
YALI1_A18732g	NA	-0.289764697	0.522780414	0.311977186	0.466557586	0.187451638	0.650768877
YALI1_A18752g	YALI0A18271g	-0.020201182	0.879711954	0.073578751	0.446903628	-0.001047173	0.994670599
YALI1_A18805g	YALI0A18293g	0.028784379	0.850318311	-0.059985496	0.605929018	-0.082053411	0.428877041
YALI1_A18817g	YALI0A18315g	-0.115710512	0.454929509	0.187449953	0.134868407	0.115576664	0.374465071
YALI1_A18847g	YALI0A18337g	-0.04253575	0.73140684	0.119578064	0.175747688	0.048235818	0.643271452
YALI1_A18897g	YALI0A18359g	0.089549251	0.496622134	-0.114031564	0.290955426	-0.121623487	0.231189725
YALI1_A18915g	YALI0A18381g	-0.023769863	0.93621493	0.083274677	0.733775	-0.011545449	0.966955568
YALI1_A19010g	NA	0.744466835	0.405993996	-0.542016732	0.437466752	-0.812814015	0.201012312
YALI1_A19025g	YALI0A18403g	-0.039929017	0.804126966	0.102011953	0.386874486	0.086887582	0.457302258
YALI1_A19070g	YALI0A18425g	-0.121232456	0.575437741	0.088365288	0.653238939	0.159434377	0.334556382
YALI1_A19089g	NA	0.275091807	0.659993667	-0.268725638	0.596560798	-0.09904373	0.862864509
YALI1_A19096g	NA	-0.207472689	0.730018389	-0.534723369	0.167930907	-0.203554059	0.676925005
YALI1_A19195g	NA	0.355652004	0.268855108	-0.616037173	0.009524404	-0.516270783	0.031379255
YALI1_A19214g	YALI0A18469g	-0.39732583	0.14151253	0.136615263	0.699571886	0.438057682	0.047258627
YALI1_A19220g	YALI0A18469g	-0.4709932	0.205940222	0.187988014	0.705037836	0.511524367	0.099812092
YALI1_A19398g	YALI0A18524g	0.116610913	0.511935282	-0.174989517	0.208312263	-0.114120921	0.435965999
YALI1_A19428g	YALI0A18568g	-0.170353434	0.112938969	0.092939152	0.398980051	0.169020507	0.058748409
YALI1_A19441g	NA	0.102607838	0.631614844	-0.110155776	0.558857996	-0.168997882	0.281837187
YALI1_A19459g	YALI0A18590g	-0.086257946	0.539906568	0.179580246	0.084182757	0.06874847	0.581079183
YALI1_A19483g	YALI0A18612g	0.008287675	0.959164895	0.097344235	0.359314539	0.024400766	0.853259222
YALI1_A19515g	YALI0A18634g	-0.090547208	0.561294516	0.16304049	0.181189483	0.165153801	0.152388396
YALI1_A19526g	YALI0A18656g	0.12460287	0.617176877	-0.010829049	0.965984989	-0.101711456	0.633108215
YALI1_A19549g	YALI0A18678g	-0.03233346	0.796406738	0.028428976	0.799928669	0.055466291	0.552214632
YALI1_A19563g	YALI0A18700g	-0.130981101	0.428362721	0.105484747	0.506503416	0.196051718	0.123500639
YALI1_A19595g	YALI0A18722g	0.023445001	0.900877371	-0.062270541	0.66683468	-0.041974359	0.775166449
YALI1_A19650g	YALI0A18744g	-0.023163012	0.888532269	0.009523544	0.950338377	0.039536712	0.76511696
YALI1_A19675g	YALI0A18744g	-0.091748573	0.554863538	0.121155327	0.346650794	0.133047225	0.268871127
YALI1_A19725g	YALI0A18766g	-0.029496078	0.832584743	0.000246569	0.997958299	0.030533128	0.79260359
YALI1_A19731g	YALI0A18788g	-0.077545075	0.619830674	0.112531764	0.368990789	0.132491035	0.251561605
YALI1_A19759g	YALI0A18810g	-0.136545032	0.370508506	0.219726134	0.063645794	0.158051066	0.229372704
YALI1_A19795g	YALI0A18832g	-0.001959042	0.991785494	0.042460202	0.834879239	0.105757828	0.508189579
YALI1_A19798g	NA	-0.164273378	0.750107519	0.669189798	0.056294588	0.411395477	0.244054316
YALI1_A19829g	YALI0A18898g	-0.100263192	0.316344732	0.091651415	0.31756581	0.120410741	0.146860287
YALI1_A19862g	YALI0A18920g	-0.93263321	0.107011008	0.419658236	0.498038515	0.624110185	0.245333404
YALI1_A19885g	YALI0A18942g	0.142773309	0.393073059	-0.074259363	0.66449865	-0.153164188	0.270005675
YALI1_A19898g	YALI0A18964g	-0.012645068	0.941736942	0.092085819	0.445008963	0.012366136	0.935768643
YALI1_A19924g	YALI0A18986g	-0.06120758	0.566553215	0.055024783	0.568742971	0.049512649	0.604349085
YALI1_A19965g	YALI0A19008g	-0.047388958	0.732627377	0.034190846	0.796118673	0.074866268	0.486541407
YALI1_A19974g	YALI0A19030g	0.208101739	0.28102863	-0.028860614	0.906500537	-0.18685038	0.26101172
YALI1_A19989g	YALI0A19052g	-0.112325035	0.295399455	0.104861383	0.286261847	0.134805835	0.131347238
YALI1_A20063g	YALI0A19074g	-0.136675401	0.283576758	0.155005273	0.156362258	0.184216238	0.077890465
YALI1_A20089g	YALI0A19096g	-0.004985312	0.984002027	0.148396231	0.401128574	0.086594676	0.643271452
YALI1_A20129g	YALI0A19140g	0.166821119	0.435084636	-0.241939483	0.159215862	-0.251801299	0.123989864
YALI1_A20131g	YALI0A19162g	0.107550057	0.730310841	-0.29770166	0.179264647	-0.180781695	0.438191573
YALI1_A20149g	YALI0A19184g	0.171058388	0.285787777	-0.260433756	0.035296189	-0.197931497	0.125363646
YALI1_A20176g	YALI0A19206g	-0.108086041	0.459776589	0.187090587	0.105144323	0.173735277	0.121459142
YALI1_A20201g	YALI0A19228g	-0.370027267	0.602147437	0.944699349	0.059361136	0.569337535	0.283493736
YALI1_A20221g	YALI0A19250g	0.046805735	0.827850429	0.012095549	0.953752958	-0.037859993	0.835008664
YALI1_A20229g	YALI0A19272g	0.143976813	0.721700579	-0.064246804	0.8750323	-0.184380961	0.561203337
YALI1_A20242g	NA	-0.138434433	0.737445865	0.268235381	0.391542798	0.279270974	0.337577833
YALI1_A20258g	YALI0A19338g	-0.091440994	0.879711954	-0.231374541	0.60522075	0.126414813	0.790804699
YALI1_A20283g	YALI0A19360g	-0.029665257	0.818427956	-0.023378965	0.847033781	0.063685575	0.493752207
YALI1_A20320g	YALI0A19404g	0.162219227	0.290540056	-0.276595945	0.016499776	-0.201400468	0.104173408
YALI1_A20353g	YALI0A19404g	-0.351372656	0.171254499	0.416575635	0.065354846	0.422394301	0.0406556
YALI1_A20370g	YALI0A19426g	-0.504652924	0.166023198	0.40094369	0.232471279	0.416367392	0.218324587
YALI1_A20398g	YALI0A19448g	-0.059512425	0.758284352	0.203783698	0.128799533	0.059657526	0.721694705
YALI1_A20408g	YALI0A19470g	0.042322662	0.756451476	-0.025052848	0.851799457	-0.061139811	0.586034336
YALI1_A20441g	YALI0A19492g	0.136121655	0.362061445	-0.042357144	0.803473758	-0.130910979	0.303833038
YALI1_A20453g	YALI0A19514g	-0.057734797	0.557177777	0.008154611	0.94089452	0.051996914	0.543950213
YALI1_A20484g	YALI0A19536g	-0.185877939	0.488361577	0.172801942	0.4658821	0.250114405	0.255451339
YALI1_A20528g	YALI0A19558g	0.203831043	0.673488271	0.100041014	0.832930057	-0.001011622	0.998484447
YALI1_A20558g	YALI0A19580g	0.06790686	0.624535376	-0.119036052	0.256161345	-0.02229776	0.869034756
YALI1_A20602g	YALI0A19602g	0.321799803	0.063616283	-0.289958514	0.056897754	-0.314036604	0.029075697
YALI1_A20611g	YALI0A19624g	0.103420891	0.594598673	-0.012541488	0.950338377	-0.01192787	0.951936959
YALI1_A20631g	YALI0A19646g	0.139598848	0.574146113	-0.096201626	0.681975936	-0.184258435	0.350711619
YALI1_A20685g	YALI0A19668g	-0.156524059	0.141797143	0.107466679	0.297101377	0.131574366	0.163894143
YALI1_A20739g	YALI0A19690g	-0.186656962	0.244019784	-0.024150508	0.906500537	0.123645257	0.425297522
YALI1_A20760g	NA	0.279599757	0.552500768	0.120403969	0.806640343	-0.071640206	0.877094132
YALI1_A20793g	YALI0A19712g	-0.083438463	0.568898804	0.152857112	0.178385261	0.094500409	0.42705641
YALI1_A20822g	YALI0A19734g	-0.015212478	0.921868991	-0.032470222	0.801456741	-0.029772905	0.807919062
YALI1_A20849g	YALI0A19756g	0.067426042	0.626654251	-0.014510684	0.923054877	-0.063674203	0.580216263
YALI1_A20855g	YALI0A19778g	-0.09318297	0.437745052	0.065296249	0.572643834	0.060428828	0.593886787
YALI1_A20884g	YALI0A19800g	0.067743084	0.711700957	-0.102063779	0.48695536	0.016140835	0.928293038
YALI1_A20902g	YALI0A19822g	0.161184447	0.295399455	-0.215892057	0.091332163	-0.219363935	0.077890465
YALI1_A20937g	YALI0A19844g	-0.054892136	0.836587183	0.048480536	0.843763357	0.118361735	0.558262498
YALI1_A20965g	YALI0A19866g	0.315434331	0.81008601	-0.859296919	0.271729149	-0.30578233	0.767036582
YALI1_A20995g	YALI0A19888g	-0.10612798	0.661497881	0.118419678	0.563603547	0.125851531	0.530290295
YALI1_A21000g	YALI0A19910g	0.017944969	0.9670793	-0.199884993	0.533679275	-0.002435381	0.995861279
YALI1_A21012g	NA	-0.118646622	0.896674418	0.868419386	0.130752103	0.550427206	0.346094216
YALI1_A21021g	YALI0A19932g	-0.227979632	0.671845906	0.464329025	0.235055017	0.408212863	0.278810284
YALI1_A21040g	YALI0A19954g	0.066410638	0.83690319	-0.050475805	0.865880541	-0.124032781	0.599071843
YALI1_A21043g	YALI0A19976g	0.031446274	0.830676915	0.032558228	0.800694331	-0.01946333	0.878485283
YALI1_A21057g	YALI0A19998g	-0.065316351	0.739020383	0.091190523	0.583489834	0.050698202	0.771808938
YALI1_A21089g	YALI0A20020g	0.065036695	0.742896469	-0.075426339	0.653543398	-0.011083113	0.954112611
YALI1_A21106g	YALI0A20064g	0.184874375	0.315979521	-0.050549419	0.810925586	-0.055510924	0.775610623
YALI1_A21120g	YALI0A20086g	0.000998891	0.993229862	0.061873014	0.610124985	0.050620285	0.675080914
YALI1_A21156g	YALI0A20108g	-0.023937227	0.869836592	0.085817933	0.398375886	0.05552113	0.608888469
YALI1_A21175g	YALI0A20130g	0.125833791	0.764969957	-0.175846026	0.588808367	-0.017842939	0.964289067
YALI1_A21203g	YALI0A20152g	-0.356989812	0.621627532	-0.448223914	0.481413086	0.227955838	0.736808001
YALI1_A21236g	YALI0A20174g	-0.134330789	0.637726344	0.112445317	0.667293493	0.186527698	0.396102314
YALI1_A21265g	YALI0A20207g	-0.042137533	0.843084146	0.144528688	0.327287281	0.102847667	0.49782744
YALI1_A21283g	YALI0A20273g	0.270273371	0.223252026	-0.256223974	0.173004075	-0.258808571	0.148305506
YALI1_A21311g	YALI0A20295g	-0.064063367	0.599875334	0.14302335	0.107952038	0.086230439	0.366631426
YALI1_A21345g	YALI0A20328g	0.17676915	0.490722596	-0.107836214	0.673256323	-0.216023026	0.307374999
YALI1_A21372g	YALI0A20350g	-0.214254311	0.781098585	0.896152634	0.086318471	0.43660393	0.443162995
YALI1_A21409g	YALI0A20372g	0.131620707	0.344903312	-0.103508229	0.432003894	-0.086067809	0.511423362
YALI1_A21420g	YALI0A20394g	0.111272454	0.453186466	-0.010970863	0.949632829	-0.024414367	0.87853898
YALI1_A21449g	YALI0A20416g	-0.013203234	0.921868991	-0.07911017	0.379855367	-0.019652977	0.861833382
YALI1_A21477g	YALI0A20438g	-0.519023094	0.401175569	0.781147495	0.140182471	0.723789438	0.132255602
YALI1_A21509g	YALI0A20482g	0.147339573	0.457046303	-0.33287368	0.015487865	-0.18200264	0.246417183
YALI1_A21550g	YALI0A20504g	0.009366586	0.94370455	-0.037706921	0.726571461	-0.004661461	0.970239214
YALI1_A21554g	YALI0A20518g	0.025129974	0.923313502	-0.085686543	0.669709975	-0.133497237	0.435819699
YALI1_A21565g	YALI0A20526g	0.027512774	0.921558019	-0.060442049	0.795335089	-0.077406468	0.714626061
YALI1_A21594g	YALI0A20548g	0.128162599	0.80994955	-0.380252998	0.348702234	-0.222854614	0.581079183
YALI1_A21617g	YALI0A20570g	0.079951431	0.671845906	-0.043930326	0.810501318	-0.092627415	0.539389173
YALI1_A21620g	YALI0A20592g	0.237290374	0.154999426	-0.112839549	0.511771456	-0.179395175	0.220425157
YALI1_A21630g	YALI0A20614g	0.077378142	0.771435701	-0.184771511	0.348204371	-0.163095744	0.404483963
YALI1_A21654g	YALI0A20636g	0.102760614	0.83323155	-0.481207773	0.116995302	-0.343893958	0.291095921
YALI1_A21696g	YALI0A20658g	0.085037532	0.522087189	-0.062663447	0.612854101	-0.057020718	0.63884383
YALI1_A21711g	YALI0A20680g	0.125720605	0.453249459	0.042489138	0.819716156	-0.060229293	0.722712776
YALI1_A21720g	YALI0A20702g	-0.100304578	0.428362721	0.155580083	0.134398718	0.092987216	0.411797189
YALI1_A21746g	YALI0A20724g	0.057132312	0.564843727	-0.011470498	0.918041524	-0.056099441	0.51066303
YALI1_A21775g	YALI0A20746g	0.204026612	0.421314148	-0.129956427	0.604311607	-0.261767672	0.222593168
YALI1_A21797g	YALI0A20768g	-0.046758123	0.700052248	0.112153932	0.200518063	0.067549833	0.467016403
YALI1_A21835g	YALI0A20790g	0.07938458	0.731274431	-0.203843391	0.232533835	-0.106753008	0.580216263
YALI1_A21841g	YALI0A20790g	0.126904665	0.576952853	-0.216744235	0.227359397	-0.176561709	0.330306256
YALI1_A21852g	NA	0.379055344	0.228908825	-0.445240102	0.078354057	-0.385444464	0.128474773
YALI1_A21871g	YALI0A20812g	-0.019233918	0.964121401	-0.020716272	0.955304541	-0.018908598	0.958644763
YALI1_A21913g	YALI0A20834g	-0.083036981	0.697916496	0.097335668	0.596636252	0.050500039	0.791716642
YALI1_A21919g	YALI0A20867g	0.032369568	0.811397912	-0.040583056	0.72950609	-0.039186007	0.733035643
YALI1_A21945g	YALI0A20900g	-0.079679054	0.580174824	0.094969923	0.437858793	0.081373485	0.493752207
YALI1_A21970g	YALI0A20922g	-0.156672002	0.228321439	0.073551238	0.596964738	0.136693084	0.228460961
YALI1_A21993g	YALI0A20944g	-0.079152156	0.624392067	0.218215754	0.047037479	0.116774696	0.344738848
YALI1_A22008g	YALI0A20966g	0.094307273	0.528610913	-0.019324654	0.908739309	-0.030721206	0.837983922
YALI1_A22023g	YALI0A20988g	0.179226963	0.342725247	0.022192282	0.923213684	-0.070763268	0.709130359
YALI1_A22027g	YALI0A21010g	0.178218975	0.184885833	0.027789292	0.872145006	-0.096989834	0.446178782
YALI1_A22073g	YALI0A21076g	-0.163418968	0.255136784	0.264927518	0.01323349	0.216913913	0.05985679
YALI1_A22093g	YALI0A21098g	0.207082605	0.07709442	-0.113742412	0.331199931	-0.177865128	0.076249423
YALI1_A22105g	YALI0A21120g	0.229937407	0.290148832	-0.271976887	0.135354951	-0.15786167	0.421503832
YALI1_A22111g	YALI0A21131g	0.064845658	0.742896469	-0.143973331	0.318556155	-0.036259567	0.839115936
YALI1_A22129g	YALI0A21153g	0.032276927	0.878279046	0.039653251	0.831817326	0.034880273	0.842105666
YALI1_A22137g	YALI0A21175g	0.063691124	0.741673007	-0.030572074	0.872372563	0.034037963	0.846915143
YALI1_A22157g	YALI0A21197g	0.023364514	0.941509548	-0.135780852	0.568054745	-0.115696836	0.618879759
YALI1_A22192g	YALI0A21241g	-0.267861951	0.165817014	0.355736431	0.026788365	0.312500234	0.047937277
YALI1_A22228g	YALI0A21263g	-0.134404118	0.541273478	-0.007263626	0.976120368	0.040572228	0.858952618
YALI1_A22236g	YALI0A21285g	0.266386906	0.240230872	-0.400094485	0.016145288	-0.351705404	0.039142005
YALI1_A22275g	YALI0A21307g	-0.092131638	0.750675737	0.069601509	0.805697209	0.046946484	0.868210775
YALI1_A22330g	YALI0A21330g	-0.082013501	0.746813769	0.386530431	0.013759249	0.184606288	0.311100881
YALI1_A22369g	YALI0A21351g	-0.225537924	0.700304109	0.054991557	0.931128211	0.25142092	0.605499943
YALI1_A22393g	YALI0A21373g	0.090269074	0.920052151	-0.302756832	0.625112212	-0.178242461	0.79074315
YALI1_A22415g	YALI0A21395g	-0.570694153	0.330507985	0.123656728	0.884132333	0.577148497	0.264575607
YALI1_A22440g	YALI0A21417g	-0.135155978	0.466308573	0.158971518	0.324454849	0.135446477	0.395474824
YALI1_A22454g	YALI0A21439g	-0.95997344	0.161538675	0.813513436	0.184280466	0.86269194	0.16361557
YALI1_A22496g	YALI0A21461g	-0.065454886	0.84627636	0.002099314	0.994362047	0.058941275	0.835829012
YALI1_A22551g	NA	0.08013755	0.764164627	0.006629154	0.978579004	-0.043004918	0.855842179
YALI1_B00049g	YALI0B00110g	0.261152546	0.131580697	-0.204325664	0.181650809	-0.225931228	0.113252267
YALI1_B00082g	YALI0B00132g	-0.186651287	0.710038991	0.094610338	0.859433956	0.219981696	0.584804942
YALI1_B00121g	NA	-0.024203098	0.941509548	-0.073709563	0.794885674	0.106978806	0.655725304
YALI1_B00133g	YALI0B00154g	-0.017206963	0.952164549	0.222745789	0.235733294	0.074801446	0.728225158
YALI1_B00198g	YALI0B00198g	-0.093984034	0.409540679	0.123884404	0.198627199	0.083245913	0.407506251
YALI1_B00214g	YALI0B00220g	0.050019579	0.733368387	0.053812516	0.677768052	-0.002497734	0.987101973
YALI1_B00242g	YALI0B00264g	0.013179272	0.923313502	0.04132147	0.699865111	-0.013217892	0.910925103
YALI1_B00273g	YALI0B00286g	0.103890548	0.449594847	-0.130979328	0.255401633	-0.116810002	0.303833038
YALI1_B00280g	YALI0B00308g	-0.001525047	0.989688973	-0.036891084	0.73462142	-0.000563495	0.996701218
YALI1_B00357g	YALI0B00396g	-0.88659617	0.087105869	0.304669962	0.587602445	0.547558135	0.259205808
YALI1_B00429g	YALI0B00440g	-0.176301459	0.722829717	0.17593512	0.670269758	0.239675292	0.528188716
YALI1_B00448g	YALI0B00462g	-0.051364793	0.806812612	0.093733044	0.569460917	0.062817791	0.716663783
YALI1_B00525g	YALI0B00528g	0.026680322	0.86536067	-0.102778192	0.33320184	-0.078389117	0.473872893
YALI1_B00539g	YALI0B00550g	0.100014026	0.434902829	-0.002458051	0.986412356	-0.098172782	0.367647548
YALI1_B00578g	YALI0B00572g	-0.181229201	0.290540056	0.229705323	0.120789101	0.177209576	0.244054316
YALI1_B00607g	NA	-0.075565883	0.71223885	0.064151951	0.731247858	0.095089843	0.560830987
YALI1_B00611g	YALI0B00594g	0.018732077	0.892891687	-0.089543298	0.34785895	-0.067397664	0.492544513
YALI1_B00675g	YALI0B00616g	-0.131908959	0.271909839	0.204976331	0.030720583	0.134073489	0.200075845
YALI1_B00704g	NA	0.59838389	0.092608073	-0.387289312	0.217829375	-0.421426528	0.154119882
YALI1_B00711g	NA	0.253498616	0.539509191	-0.068966123	0.8750323	0.008502207	0.985136637
YALI1_B00719g	NA	-0.177484556	0.806769366	0.915517323	0.053581353	0.525733612	0.275874367
YALI1_B00731g	NA	0.15677588	0.787000631	0.146870622	0.7799885	0.092776342	0.853608849
YALI1_B00798g	NA	-0.234277202	0.588274684	0.57215732	0.127399306	0.31075346	0.348304881
YALI1_B00819g	NA	-0.108222803	0.825943043	0.575398157	0.118042358	0.194789876	0.592162578
YALI1_B00829g	YALI0B00814g	-0.353566973	0.32198974	0.614354494	0.035556432	0.465252666	0.092800668
YALI1_B00908g	YALI0B00792g	0.099889509	0.441582356	-0.171018804	0.092506788	-0.121932516	0.267597639
YALI1_B00977g	YALI0B00770g	0.023578659	0.911188008	-0.074846171	0.646021842	0.009028886	0.963026554
YALI1_B01011g	NA	-0.222934589	0.543198334	0.161761156	0.663404246	0.28233546	0.333413795
YALI1_B01014g	NA	0.026190505	0.956331895	0.102450017	0.797100758	0.141246985	0.67641949
YALI1_B01030g	YALI0B00748g	-0.016327649	0.975919619	0.070807299	0.8750323	0.024119952	0.955891212
YALI1_B01060g	NA	0.058219783	0.9108163	0.141383117	0.73897976	0.120774372	0.76514891
YALI1_B01065g	NA	0.180276447	0.676043445	0.044570721	0.92172871	0.03310208	0.937802453
YALI1_B01069g	NA	-0.259283853	0.273062126	0.08567046	0.756132133	0.153139571	0.494005629
YALI1_B01084g	YALI0B00726g	0.012681249	0.949865288	0.055637226	0.72950609	-0.027694549	0.868560779
YALI1_B01127g	NA	0.372786544	0.331138802	-0.376686078	0.252785704	-0.425526755	0.162395561
YALI1_B01136g	YALI0B00704g	-0.003103352	0.984002027	-0.015304818	0.914762836	-0.024865795	0.853608849
YALI1_B01275g	NA	-0.131619086	0.697918423	0.281544905	0.29408602	0.203173082	0.419848696
YALI1_B01281g	NA	-0.077663446	0.821961	0.178378521	0.52790053	0.135700385	0.598264271
YALI1_B01292g	NA	-0.148157033	0.651506179	0.006588555	0.982785399	0.065136113	0.827641468
YALI1_B01317g	YALI0B00660g	-0.257111524	0.401797145	0.527353596	0.046067838	0.283324241	0.270005675
YALI1_B01325g	YALI0B00638g	0.661323181	0.033595928	-0.578697424	0.033119938	-0.704101148	0.003302403
YALI1_B01334g	NA	0.133550837	0.673488271	-0.108569655	0.709897827	-0.157838481	0.520737018
YALI1_B01428g	YALI0B00836g	-0.11713578	0.526564235	0.066814813	0.719387683	0.066506698	0.710758231
YALI1_B01464g	YALI0B00858g	-0.03586884	0.874130539	-0.026928434	0.894980284	-0.044714237	0.812506453
YALI1_B01485g	NA	-0.193522984	0.70880106	0.384431891	0.362541673	0.332345267	0.384051874
YALI1_B01511g	YALI0B00880g	-0.066643971	0.707809142	0.164806074	0.20830782	0.100682426	0.461766447
YALI1_B01552g	YALI0B00902g	-0.028679504	0.840885293	0.031118151	0.803869374	-0.009923747	0.938523515
YALI1_B01568g	NA	0.349339657	0.144680826	-0.316425235	0.124413984	-0.385279821	0.037903015
YALI1_B01578g	YALI0B00924g	-0.250407803	0.231253547	0.228748526	0.244971489	0.260933373	0.14656176
YALI1_B01628g	YALI0B00946g	-0.184983126	0.476274763	0.109875012	0.669709975	0.099757158	0.702462965
YALI1_B01644g	YALI0B00968g	0.182564713	0.107011008	-0.188844131	0.049385716	-0.217906646	0.015450908
YALI1_B01698g	YALI0B00990g	-0.037577506	0.900645697	0.014970607	0.958198344	-0.027420737	0.920353304
YALI1_B01711g	YALI0B01012g	-0.131893143	0.361057483	0.132483803	0.306540239	0.142421041	0.232554471
YALI1_B01719g	NA	-0.017793425	0.941509548	-0.089142385	0.626831229	0.04161394	0.83140478
YALI1_B01725g	NA	0.125104199	0.454929509	-0.112320363	0.451832403	-0.050194377	0.761961788
YALI1_B01752g	YALI0B01034g	0.037287641	0.875356126	0.005878015	0.978390503	-0.085560822	0.634770201
YALI1_B01760g	NA	0.311208179	0.321499585	0.083401046	0.827654099	-0.205554834	0.469439153
YALI1_B01771g	NA	-0.023063859	0.951954188	-0.144722398	0.602703378	-0.032827942	0.917379219
YALI1_B01813g	YALI0B01056g	-0.14495625	0.166418685	0.185621478	0.033177477	0.152782123	0.08655011
YALI1_B01826g	NA	0.338538711	0.505779821	-0.127309774	0.795335089	-0.136782164	0.77120622
YALI1_B01839g	YALI0B01078g	-0.045095955	0.86607434	-0.042572123	0.862803115	-0.08078514	0.697138799
YALI1_B01878g	YALI0B01100g	0.609671187	0.425494183	-0.664055425	0.223589206	-0.578151916	0.32398914
YALI1_B01889g	NA	0.246101086	0.234336545	-0.320128446	0.046729054	-0.214695457	0.215423353
YALI1_B01892g	NA	0.22945586	0.230868403	-0.260449679	0.093976413	-0.163694463	0.331738651
YALI1_B01903g	YALI0B01144g	0.078452776	0.623401529	0.056218921	0.703248094	-0.02306114	0.879887952
YALI1_B01962g	YALI0B01166g	0.047537667	0.858177466	0.140449477	0.46628654	0.063260316	0.767036582
YALI1_B02011g	YALI0B01188g	0.144264141	0.277188602	-0.090892292	0.488099509	-0.128332552	0.26101172
YALI1_B02021g	NA	0.038826124	0.876068473	-0.209794614	0.181924796	-0.046837236	0.812952057
YALI1_B02035g	NA	0.042537575	0.93196156	0.284025064	0.424848141	0.104664069	0.786136232
YALI1_B02047g	YALI0B01210g	-0.323211915	0.349202344	0.400927666	0.195290353	0.347351199	0.222915783
YALI1_B02091g	YALI0B01224g	-0.110498411	0.356064595	0.156899221	0.108058807	0.10804173	0.315428179
YALI1_B02149g	YALI0B01254g	0.171889749	0.205746351	-0.182705	0.10964444	-0.181467192	0.096170538
YALI1_B02151g	NA	0.18220311	0.447393711	0.125982299	0.589767848	-0.090164799	0.696879141
YALI1_B02162g	NA	0.280123007	0.360579906	-0.449239125	0.04892441	-0.430580397	0.050092895
YALI1_B02177g	YALI0B01276g	0.062985659	0.710467277	0.050902632	0.747256948	0.004742512	0.978590227
YALI1_B02194g	YALI0B01298g	-0.230726665	0.181813805	0.131825635	0.463367525	0.185426469	0.244832039
YALI1_B02228g	YALI0B01320g	-0.031797775	0.807463663	0.116197617	0.186221844	0.065749051	0.487925585
YALI1_B02283g	YALI0B01342g	-0.202435727	0.480621653	0.018846318	0.955304541	0.181615268	0.457430188
YALI1_B02345g	YALI0B01364g	-0.076442768	0.762094673	0.08891634	0.683078126	0.023619371	0.926613075
YALI1_B02375g	YALI0B01386g	-0.074274024	0.479708336	0.059475481	0.54282121	0.057379476	0.558272978
YALI1_B02415g	YALI0B01408g	-0.035795906	0.785871257	0.056443551	0.598424322	0.062166048	0.547230961
YALI1_B02430g	YALI0B01430g	0.099531168	0.55319135	-0.042114943	0.807104398	-0.049401882	0.754773522
YALI1_B02465g	YALI0B01452g	0.303739858	0.038337412	-0.10679971	0.519594314	-0.224391906	0.089140568
YALI1_B02472g	YALI0B01474g	0.340431665	0.037823531	-0.289980211	0.052133217	-0.31244887	0.027841588
YALI1_B02487g	YALI0B01540g	0.209467279	0.293229318	-0.064361042	0.782334591	-0.19474278	0.278189437
YALI1_B02496g	YALI0B01562g	0.227895813	0.126134282	-0.287612296	0.014609943	-0.23209213	0.057068422
YALI1_B02506g	YALI0B01584g	0.15135137	0.355237352	-0.156475291	0.276788441	-0.124293067	0.391785303
YALI1_B02533g	YALI0B01606g	-0.006104453	0.971671724	0.155577929	0.114896252	0.082173907	0.442262784
YALI1_B02550g	YALI0B01628g	0.003351119	0.980084839	-0.017724494	0.875869463	-0.019932943	0.855889211
YALI1_B02604g	YALI0B01650g	0.308457821	0.326844864	-0.223002706	0.447237384	-0.266060641	0.309761212
YALI1_B02637g	YALI0B01672g	0.096538362	0.498905003	-0.091908161	0.459269223	-0.119069861	0.287381789
YALI1_B02642g	YALI0B01694g	-0.095091238	0.431980154	0.133868231	0.185422515	0.141535181	0.137431202
YALI1_B02672g	YALI0B01716g	0.040632782	0.83448194	-0.024150308	0.895404562	-0.024467367	0.885353295
YALI1_B02696g	YALI0B01738g	-0.360020935	0.028766041	0.379512882	0.008900956	0.378085322	0.008497599
YALI1_B02717g	YALI0B01760g	0.299859544	0.06348202	-0.230116436	0.116338785	-0.253956036	0.06111517
YALI1_B02733g	YALI0B01771g	0.137933486	0.488231108	-0.223924684	0.121665736	-0.15453423	0.318990613
YALI1_B02767g	YALI0B01782g	-0.022234661	0.882474573	0.063538019	0.58134009	0.050133313	0.667725289
YALI1_B02781g	YALI0B01804g	-0.0037805	0.979391249	0.066091403	0.485954624	0.031560367	0.76512273
YALI1_B02806g	YALI0B01826g	0.094641385	0.333614829	-0.098762637	0.248826736	-0.10080158	0.219796165
YALI1_B02833g	YALI0B01848g	-0.018534157	0.925643916	0.000943771	0.995174135	0.052357817	0.726984961
YALI1_B02850g	NA	0.061829474	0.835135017	-0.144875882	0.496814312	-0.094823703	0.668298997
YALI1_B02874g	YALI0B01870g	0.152388218	0.278207141	-0.258166107	0.016499776	-0.19966561	0.080738881
YALI1_B02881g	YALI0B01892g	0.03920824	0.873183997	-0.072908844	0.713161288	-0.102091101	0.563114742
YALI1_B02931g	YALI0B01980g	0.118896366	0.568898804	-0.300433395	0.030878276	-0.148528347	0.360642907
YALI1_B02991g	YALI0B02002g	-0.194148247	0.164558828	0.263602127	0.017306292	0.204680205	0.089140568
YALI1_B03021g	YALI0B02024g	0.143725894	0.892704479	-0.550043407	0.417999161	-0.405165209	0.580003134
YALI1_B03041g	YALI0B02046g	0.266797816	0.104279329	-0.260503744	0.058102901	-0.280003924	0.031499726
YALI1_B03043g	YALI0B02068g	0.094040526	0.410941582	-0.137135145	0.133871066	-0.090043342	0.352211691
YALI1_B03085g	YALI0B02090g	0.051858265	0.883623992	-0.411584299	0.036165961	-0.28514986	0.182119563
YALI1_B03168g	YALI0B02156g	0.069135607	0.706403163	0.071008739	0.663654912	-0.062063968	0.68487804
YALI1_B03198g	YALI0B02178g	-0.145457649	0.25897221	0.182583661	0.085815592	0.128950172	0.278215891
YALI1_B03225g	YALI0B02200g	-0.095174558	0.684714612	0.128806165	0.473420358	0.204722841	0.196930417
YALI1_B03288g	NA	-0.247433905	0.649995836	0.587126356	0.152485626	0.459360381	0.237541126
YALI1_B03290g	NA	0.008005221	0.981055024	0.163284798	0.485914777	-0.009007933	0.975849729
YALI1_B03299g	NA	-0.110021282	0.83448194	0.497067196	0.178973	0.281304881	0.433122501
YALI1_B03314g	YALI0B02222g	0.071821913	0.703658219	-0.044264575	0.807483655	-0.06144347	0.704075121
YALI1_B03324g	NA	0.09904835	0.71223885	-0.020290435	0.946624685	-0.105477387	0.634770201
YALI1_B03335g	YALI0B02244g	-0.087425875	0.61661065	0.126376099	0.365382256	0.121341495	0.372613669
YALI1_B03404g	YALI0B02266g	-0.26025749	0.124736404	0.365662784	0.005926045	0.279545239	0.047129358
YALI1_B03429g	NA	0.230731428	0.431102563	0.185524724	0.499529718	-0.157433786	0.540121118
YALI1_B03556g	NA	0.20604161	0.446472634	-0.384184947	0.040193416	-0.177343917	0.431924563
YALI1_B03644g	YALI0B02332g	-0.138666277	0.322550846	0.229201308	0.033119938	0.19543302	0.08655011
YALI1_B03673g	NA	0.042813057	0.95095609	0.352647654	0.463558258	-0.021901096	0.971771985
YALI1_B03719g	YALI0B02376g	-0.081546235	0.372500397	0.035788182	0.713428792	0.085855291	0.273803343
YALI1_B03761g	YALI0B02398g	-0.187003249	0.301390045	0.148164291	0.368990789	0.206165092	0.165248049
YALI1_B03797g	YALI0B02409g	-0.054077235	0.826370699	-0.125614693	0.500199028	-0.019286464	0.935768643
YALI1_B03807g	YALI0B02420g	0.006179347	0.978501245	-0.080376335	0.610387922	0.0190068	0.917379219
YALI1_B03853g	YALI0B02464g	-0.070926523	0.762988742	0.256962268	0.109195007	0.173358409	0.297610739
YALI1_B03910g	YALI0B02544g	-0.120303986	0.73469435	-0.241339438	0.388202174	-0.001494302	0.996954906
YALI1_B03963g	YALI0B02552g	-0.101237602	0.451937001	0.151788822	0.169680488	0.153410686	0.135647901
YALI1_B03979g	YALI0B02574g	0.033605571	0.728323876	-0.012692709	0.899147759	-0.028546311	0.747347822
YALI1_B04032g	YALI0B02662g	-0.082198049	0.564953006	0.082981073	0.502672934	0.109577602	0.348304881
YALI1_B04068g	YALI0B02684g	0.147939681	0.398767184	-0.102548305	0.511771456	-0.116720504	0.431125349
YALI1_B04123g	YALI0B02706g	0.061323209	0.513828919	-0.045402974	0.605395011	-0.080418107	0.295084731
YALI1_B04138g	YALI0B02728g	-0.138573715	0.380079294	0.150664642	0.269189638	0.114826743	0.431924563
YALI1_B04200g	YALI0B02750g	-0.131095008	0.234336545	0.173187996	0.059508768	0.155728669	0.089354216
YALI1_B04212g	YALI0B02772g	0.053535387	0.767484221	-0.091198801	0.529453085	-0.025866529	0.875372954
YALI1_B04228g	YALI0B02794g	0.116601502	0.573115328	0.020069046	0.931228233	-0.05233098	0.788207935
YALI1_B04248g	YALI0B02816g	-0.136125853	0.208377593	0.18571069	0.034937489	0.13492408	0.151497728
YALI1_B04274g	YALI0B02838g	-0.112217337	0.207406555	0.082059854	0.327287281	0.098060619	0.219848713
YALI1_B04309g	YALI0B02852g	0.008618392	0.964546123	-0.040657121	0.79931268	0.024503301	0.877094132
YALI1_B04321g	YALI0B02860g	-0.053883608	0.640681689	0.091712607	0.300410443	0.065810777	0.489757738
YALI1_B04370g	YALI0B02882g	-0.134181004	0.152571133	0.175325034	0.020587077	0.152268217	0.048722538
YALI1_B04391g	YALI0B02904g	0.016202987	0.911192368	0.076719113	0.460079999	-0.00356316	0.978861764
YALI1_B04433g	YALI0B02948g	-0.085956791	0.481891271	0.091683827	0.387925838	0.08009977	0.45284119
YALI1_B04466g	YALI0B02970g	0.005892341	0.976369659	-0.118811174	0.318679738	-0.049089532	0.722270465
YALI1_B04470g	YALI0B02992g	0.054939478	0.630540333	0.003135015	0.978579004	-0.069972474	0.443381871
YALI1_B04497g	YALI0B03014g	0.147716488	0.265185104	-0.23143533	0.023549943	-0.150292069	0.182477715
YALI1_B04502g	YALI0B03036g	0.206689804	0.304536753	-0.359490204	0.01598476	-0.262701415	0.098070314
YALI1_B04523g	YALI0B03058g	-0.079640001	0.480621653	0.094224133	0.333497365	0.10475992	0.239880769
YALI1_B04540g	YALI0B03080g	0.106661343	0.309286196	-0.135868178	0.125293296	-0.093391725	0.321147849
YALI1_B04559g	YALI0B03102g	-0.106666474	0.378133274	0.089284461	0.43234881	0.101921527	0.326725755
YALI1_B04589g	YALI0B03124g	0.058068458	0.703796322	-0.062690197	0.636480555	-0.060526423	0.638634112
YALI1_B04637g	YALI0B03146g	0.088757066	0.568898804	0.017475127	0.922004201	-0.000916883	0.996164245
YALI1_B04690g	NA	-0.477685319	0.07136793	0.371030075	0.152491942	0.536852618	0.011645345
YALI1_B04703g	NA	-0.321237178	0.14324153	0.221681192	0.311497215	0.375503225	0.03471424
YALI1_B04747g	YALI0B03190g	-0.048152147	0.74430164	0.165561182	0.098597561	0.073251159	0.524243571
YALI1_B04753g	YALI0B03212g	-0.035984355	0.878911301	0.118772091	0.503788172	0.070682539	0.700474372
YALI1_B04759g	YALI0B03234g	0.027001004	0.91601268	0.047040837	0.831074286	0.029552489	0.889449803
YALI1_B04779g	YALI0B03278g	0.374429051	0.327831013	-0.532978233	0.074754063	-0.529780527	0.070669602
YALI1_B04781g	YALI0B03300g	0.422473546	0.133921827	-0.478011346	0.024234303	-0.420976843	0.056682075
YALI1_B04803g	YALI0B03322g	0.181297874	0.122774204	-0.11518765	0.310473814	-0.197501437	0.036953272
YALI1_B04831g	YALI0B03344g	-0.013472177	0.961573268	-0.207072646	0.2277955	-0.06637107	0.749279199
YALI1_B04853g	YALI0B03366g	-0.003409762	0.982331946	0.034520387	0.782334591	0.003300518	0.981391621
YALI1_B04873g	YALI0B03388g	0.179561911	0.166023198	-0.128661259	0.288923061	-0.141530232	0.215955343
YALI1_B04901g	YALI0B03410g	0.00408408	0.980084839	-0.09486476	0.367439769	-0.050805423	0.662147473
YALI1_B04937g	YALI0B03476g	0.106826133	0.679086466	-0.212082328	0.269292538	-0.215324391	0.250587648
YALI1_B04947g	NA	0.184320982	0.47425755	-0.138031165	0.559538612	-0.219780275	0.276306048
YALI1_B04950g	YALI0B03498g	0.375666391	0.027502974	-0.250562109	0.147193095	-0.328781492	0.031579752
YALI1_B04974g	YALI0B03520g	-0.008837646	0.941509548	-0.023961169	0.817429724	0.021331409	0.831985076
YALI1_B05005g	YALI0B03542g	-0.214190311	0.286419657	0.038328006	0.878705958	0.146735559	0.435610393
YALI1_B05024g	YALI0B03564g	-0.105654015	0.419142464	0.019459899	0.900206219	0.065891697	0.604349085
YALI1_B05043g	YALI0B03575g	0.12427222	0.639200822	0.029932234	0.914762836	-0.104328415	0.631965354
YALI1_B05072g	YALI0B03630g	0.091160253	0.834451751	-0.290124588	0.340895614	-0.273101103	0.373272337
YALI1_B05106g	YALI0B03652g	-0.10860914	0.333614829	-0.006525001	0.961321296	0.058978859	0.594543581
YALI1_B05185g	YALI0B03718g	-0.091293857	0.41609126	0.060966986	0.582681945	0.115042527	0.219048843
YALI1_B05226g	YALI0B03762g	-0.080373001	0.402610679	0.076396917	0.373919647	0.089179623	0.282034941
YALI1_B05242g	YALI0B03784g	0.193363798	0.499155662	-0.335791025	0.116578892	-0.30414884	0.151657727
YALI1_B05282g	YALI0B03850g	0.079210959	0.65917065	-0.143453559	0.288401236	-0.020153416	0.909577604
YALI1_B05288r	YALI0B03872r	0.471643655	0.431102563	-0.2077923	0.726075112	-0.468091122	0.326725755
YALI1_B05295g	YALI0B03916g	-0.470852613	0.458504288	0.796339782	0.124413984	0.520760122	0.319959623
YALI1_B05313g	YALI0B03938g	0.210114341	0.093929016	-0.116055916	0.351296798	-0.122127338	0.30619545
YALI1_B05350g	YALI0B03960g	-0.032113569	0.825490864	0.031766889	0.808486496	0.034999985	0.776098725
YALI1_B05364g	YALI0B03982g	-0.134997789	0.264921559	0.123033078	0.263278003	0.117191034	0.294181207
YALI1_B05404g	YALI0B04004g	-0.057796805	0.722495664	0.086439229	0.523930449	0.086475428	0.493203061
YALI1_B05420g	YALI0B04026g	0.019841581	0.872112739	0.007000612	0.950067252	0.016890991	0.871235831
YALI1_B05438g	YALI0B04048g	-0.003168164	0.984002027	0.089505148	0.418635379	0.054578906	0.637758077
YALI1_B05454g	YALI0B04070g	-0.14549954	0.334028522	0.152526949	0.262559979	0.160541808	0.207522763
YALI1_B05483g	YALI0B04092g	0.087715596	0.591045101	-0.003718469	0.981738353	-0.033824807	0.831816359
YALI1_B05497g	YALI0B04114g	0.151832818	0.428362721	-0.322290969	0.024243868	-0.179198752	0.275566655
YALI1_B05520g	YALI0B04136g	0.161561251	0.47425755	-0.337974014	0.039830134	-0.290307307	0.083535091
YALI1_B05522g	YALI0B04158g	0.055050184	0.670775924	-0.030063924	0.810010709	-0.043882377	0.695853579
YALI1_B05571g	YALI0B04180g	-0.072608173	0.511935282	0.096578115	0.286095193	0.06551577	0.508897406
YALI1_B05609g	YALI0B04202g	0.456226962	0.745758526	1.10134201	0.256161345	0.450204497	0.677146121
YALI1_B05639g	NA	0.361853909	0.337490598	-0.223965268	0.54795018	-0.246969847	0.461456184
YALI1_B05646g	YALI0B04224g	0.333590543	0.255544416	-0.20360046	0.49639359	-0.385817677	0.128474773
YALI1_B05690g	YALI0B04246g	0.356200546	0.078248923	-0.363423677	0.030878276	-0.374639262	0.021339046
YALI1_B05698g	NA	0.269408107	0.181813805	-0.303132656	0.066888374	-0.297488837	0.059314572
YALI1_B05711g	YALI0B04268g	-0.128005521	0.251689177	0.140634557	0.148092512	0.141707024	0.132611326
YALI1_B05730g	NA	-0.088607844	0.777250668	0.140738909	0.599533043	0.037782138	0.896358236
YALI1_B05762g	YALI0B04290g	-0.191406996	0.152571133	0.138449743	0.277980046	0.171021195	0.152151967
YALI1_B05782g	NA	0.423960707	0.314528189	0.029573423	0.952488908	-0.26114035	0.484325417
YALI1_B05798g	YALI0B04312g	-0.247120511	0.110411958	0.013942242	0.947621925	0.21062278	0.134555863
YALI1_B05832g	YALI0B04334g	-0.013356216	0.975074032	-0.008947053	0.978958734	-0.054742059	0.871512699
YALI1_B05891g	YALI0B04356g	0.003202537	0.982890284	0.023852378	0.853073312	-0.008029193	0.95041838
YALI1_B05947g	YALI0B04378g	0.030889876	0.833552856	-0.102237411	0.308377861	-0.035007078	0.770656353
YALI1_B05954g	NA	0.306547475	0.219514277	-0.300796417	0.209927173	-0.208259175	0.362552642
YALI1_B05964g	YALI0B04400g	-0.108836571	0.498905003	0.253966104	0.027557009	0.152934638	0.21870002
YALI1_B05971g	YALI0B04422g	0.215380505	0.330266226	-0.314111171	0.074754063	-0.33219332	0.047308868
YALI1_B05984g	NA	-0.070079851	0.916026637	0.08468554	0.886230082	0.05698076	0.920173689
YALI1_B05995g	YALI0B04444g	-0.04660558	0.781638959	0.147423623	0.209512473	0.051665675	0.718074492
YALI1_B06015g	YALI0B04466g	0.02164795	0.92461647	0.007139496	0.970628616	-0.028070802	0.879511618
YALI1_B06028g	YALI0B04488g	-0.166292044	0.420507491	0.222779182	0.193602016	0.156012771	0.395695234
YALI1_B06089g	NA	0.161781903	0.714481906	0.153938376	0.688652417	-0.177174157	0.608321904
YALI1_B06110g	YALI0B04510g	-0.244206312	0.451937001	0.443809875	0.085805981	0.358115071	0.168961027
YALI1_B06134g	NA	0.440406821	0.196427965	-0.431223627	0.116051304	-0.42844807	0.113893644
YALI1_B06141g	NA	0.470519731	0.243451912	-0.641329272	0.020804469	-0.539857045	0.066476981
YALI1_B06146g	NA	0.326095719	0.35318698	-0.561531178	0.026421527	-0.275966998	0.346412315
YALI1_B06207g	NA	0.07951657	0.854527085	0.153538619	0.665161336	-0.060160894	0.868316026
YALI1_B06245g	YALI0B04532g	0.186319014	0.150101769	-0.232373016	0.024108589	-0.182787051	0.089660261
YALI1_B06264g	YALI0B04554g	-0.310666745	0.476096857	0.479146287	0.17913235	0.437280602	0.192424229
YALI1_B06315g	YALI0B04598g	0.134881083	0.499527899	-0.077879614	0.693700682	-0.050274765	0.800054779
YALI1_B06324g	YALI0B04620g	0.031224671	0.900019334	-0.052377046	0.80207788	0.009642314	0.96576574
YALI1_B06328g	NA	-0.128322863	0.698036287	0.253783761	0.31527739	0.310298162	0.15836608
YALI1_B06340g	YALI0B04642g	-0.09393563	0.624053189	0.072792904	0.6822797	0.09768427	0.528188716
YALI1_B06447g	YALI0B04708g	0.07592528	0.721296413	-0.090867447	0.619969286	-0.119328665	0.475389193
YALI1_B06487g	YALI0B04752g	0.118124894	0.449594847	-0.106405774	0.444805359	-0.12543979	0.322250021
YALI1_B06489g	YALI0B04774g	0.067670817	0.712993392	-0.137588058	0.318556155	-0.086251631	0.556447139
YALI1_B06508g	NA	0.126583876	0.746837124	-0.490375664	0.03814856	-0.330046792	0.203109723
YALI1_B06514g	NA	0.148635287	0.602472223	-0.272274121	0.18526507	-0.168690999	0.440740929
YALI1_B06537g	NA	0.298152731	0.126134282	-0.274105316	0.106892555	-0.252697645	0.123777532
YALI1_B06607g	YALI0B04796g	-0.249098466	0.393204998	0.330189035	0.185969801	0.333212358	0.15782036
YALI1_B06613g	NA	-0.282565861	0.629126028	0.222743002	0.706479733	0.033890478	0.955891212
YALI1_B06620g	NA	0.214074686	0.572921302	-0.306739545	0.314310287	-0.258779547	0.381268964
YALI1_B06628g	NA	0.133687086	0.70497542	0.001580429	0.99566103	-0.16428434	0.547806606
YALI1_B06635g	NA	0.5621751	0.033595928	-0.203293706	0.500199028	-0.386818048	0.107291169
YALI1_B06640g	NA	0.41266178	0.102382451	-0.273711797	0.233702336	-0.31976675	0.128648216
YALI1_B06644g	NA	0.425849146	0.075404045	-0.402382284	0.040877627	-0.40979353	0.031579752
YALI1_B06704g	YALI0B04840g	0.006635284	0.957599423	0.003328668	0.974684113	0.008181355	0.938400198
YALI1_B06726g	NA	0.415957043	0.102382451	-0.37506571	0.083733324	-0.364075112	0.078952236
YALI1_B06735g	YALI0B04851g	0.228819959	0.388205914	-0.05086148	0.871404096	-0.196819475	0.382764092
YALI1_B06745g	YALI0B04862g	-0.061683875	0.877243079	0.030452647	0.935661463	-0.021142349	0.953513758
YALI1_B06776g	YALI0B04884g	0.176867926	0.527038945	-0.389920304	0.025891714	-0.231964533	0.264412143
YALI1_B06809g	YALI0B04906g	-0.308228602	0.290540056	0.465787658	0.036422332	0.440760439	0.057205037
YALI1_B06839g	YALI0B04928g	0.24446128	0.089187133	-0.291345454	0.014908019	-0.249455973	0.045300973
YALI1_B06847g	YALI0B04950g	-0.118686186	0.216436862	0.031140767	0.784392926	0.085491742	0.352211691
YALI1_B06866g	YALI0B04972g	-0.077102935	0.514178518	-0.046527115	0.689361532	0.077384599	0.436676236
YALI1_B06885g	NA	0.291921888	0.529280268	-0.342989961	0.351399548	-0.134057217	0.756509744
YALI1_B06928g	YALI0B05038g	-0.148752974	0.281901307	0.214381025	0.053641569	0.194519145	0.08249396
YALI1_B07043g	YALI0B05060g	-0.411994378	0.351013272	0.258505216	0.568136773	0.448914466	0.222261309
YALI1_B07076g	YALI0B05104g	-0.117107195	0.451435916	0.179455416	0.148569116	0.165538688	0.192325094
YALI1_B07094g	YALI0B05126g	-0.131735072	0.188586646	0.126706898	0.160475972	0.110522271	0.229720103
YALI1_B07134g	YALI0B05148g	0.017007536	0.885987888	-0.026453983	0.79931268	-0.003955225	0.973381405
YALI1_B07162g	YALI0B05170g	0.08078289	0.542229552	-0.149937389	0.138719524	-0.107231802	0.31639473
YALI1_B07203g	NA	-0.051985513	0.896965377	0.053368483	0.884038993	0.020581364	0.954099444
YALI1_B07210g	YALI0B05214g	0.08290848	0.457493344	-0.041629305	0.714916521	-0.037942021	0.728896061
YALI1_B07220g	YALI0B05236g	0.071775956	0.649995836	-0.149785074	0.193602016	-0.057996422	0.669066511
YALI1_B07271g	YALI0B05258g	-0.076121128	0.71593558	0.084686933	0.647410628	0.115496065	0.498746379
YALI1_B07284g	YALI0B05280g	-0.037708501	0.845161052	-0.081870792	0.586029957	0.028777157	0.868210775
YALI1_B07295g	YALI0B05302g	-0.150909147	0.13322028	0.033284377	0.790851572	0.102298371	0.288913084
YALI1_B07331g	YALI0B05346g	0.095389764	0.447393711	-0.0609306	0.626014619	-0.08219892	0.473325557
YALI1_B07366g	YALI0B05368g	0.043539614	0.857262375	-0.077626659	0.694432489	-0.094241337	0.609032587
YALI1_B07374g	YALI0B05390g	0.087803148	0.443842187	-0.138777301	0.129065614	-0.057859687	0.589863877
YALI1_B07399g	YALI0B05412g	0.150765001	0.263948347	-0.210442227	0.049411742	-0.155430239	0.166674328
YALI1_B07413g	YALI0B05434g	0.366931656	0.169120967	-0.576457085	0.00275061	-0.378148385	0.078952236
YALI1_B07444g	YALI0B05456g	-0.054830762	0.900661496	0.194634305	0.553292867	0.189807883	0.544432886
YALI1_B07500g	YALI0B05478g	-0.145650433	0.671579025	0.19895906	0.458082319	0.274451244	0.251561605
YALI1_B07538g	YALI0B05500g	0.266164573	0.208377593	-0.292282227	0.105127803	-0.274328289	0.120441404
YALI1_B07549g	YALI0B05522g	0.033750873	0.877243079	-0.018519258	0.929011287	0.012917565	0.947844775
YALI1_B07578g	YALI0B05544g	-0.025165839	0.941509548	0.152755055	0.537787166	0.058438205	0.829730607
YALI1_B07598g	YALI0B05566g	-0.140021184	0.267458625	0.164324665	0.134201255	0.152947695	0.168336543
YALI1_B07652g	YALI0B05610g	0.332427674	0.122013521	-0.181176237	0.414817118	-0.347110862	0.059980179
YALI1_B07675g	YALI0B05632g	0.14973439	0.207943613	-0.091676383	0.433455161	-0.131905509	0.199378389
YALI1_B07696g	YALI0B05654g	-0.05937826	0.864807742	0.390310257	0.065354846	0.215738043	0.334160598
YALI1_B07735g	YALI0B05676g	-0.049951738	0.745758526	0.206194707	0.036263038	0.114053695	0.309761212
YALI1_B07762g	YALI0B05698g	0.139347099	0.318041787	0.005509399	0.973434681	-0.052126748	0.717353923
YALI1_B07769g	YALI0B05720g	-0.05763878	0.574305598	0.005827595	0.958774021	0.012975508	0.903980189
YALI1_B07786g	YALI0B05742g	0.090636693	0.513828919	-0.016170216	0.92028688	-0.06952861	0.573528571
YALI1_B07809g	YALI0B05764g	-0.093460595	0.445514102	0.145323656	0.141568963	0.109087593	0.287153209
YALI1_B07843g	YALI0B05786g	0.068893625	0.604280332	-0.061364033	0.6025709	-0.034215086	0.784728728
YALI1_B07852g	YALI0B05808g	0.082823908	0.710467277	0.107448349	0.572743424	-0.001285482	0.996164245
YALI1_B07853g	YALI0B05830g	0.11956512	0.603834672	0.218910346	0.221293471	-0.046670971	0.830109533
YALI1_B07864g	YALI0B05852g	-0.053362184	0.64478845	0.053128597	0.599833554	0.067192545	0.466151949
YALI1_B07915g	YALI0B05874g	0.045159261	0.85409737	-0.073372834	0.712259937	-0.104920161	0.562181927
YALI1_B07937g	YALI0B05896g	0.159572081	0.554168997	-0.208382365	0.351280547	-0.235272691	0.280059982
YALI1_B07957g	YALI0B05918g	0.049086837	0.70497542	-0.076982645	0.447226613	-0.024544814	0.83542406
YALI1_B07983g	YALI0B05940g	-0.006264749	0.964546123	-0.042482348	0.697597619	-0.008034519	0.949385072
YALI1_B08094g	YALI0B05962g	0.02954847	0.892151995	-0.103922825	0.521058397	-0.099644313	0.533916893
YALI1_B08102g	NA	0.11388185	0.637869063	0.055443634	0.81771339	0.001045705	0.996743116
YALI1_B08123g	YALI0B06006g	0.032105734	0.87030234	-0.044459997	0.79127027	-0.074804848	0.596296818
YALI1_B08156g	YALI0B06094g	0.072432937	0.614176178	0.012601009	0.935519834	-0.041581098	0.75455734
YALI1_B08186g	YALI0B06105g	0.601279949	0.038682122	-0.669097631	0.00395651	-0.673824855	0.002070058
YALI1_B08193g	YALI0B06116g	-0.00398821	0.984293068	0.00859548	0.963225516	-0.000842547	0.996701218
YALI1_B08207g	NA	0.119698288	0.606403819	-0.137298385	0.496077992	-0.070865928	0.734409522
YALI1_B08214g	NA	0.025168476	0.888889016	0.104588047	0.418153042	0.038381564	0.791426368
YALI1_B08247g	YALI0B06138g	-0.079727849	0.886679469	0.037078369	0.942109478	0.160882599	0.700445028
YALI1_B08263g	YALI0B06160g	1.059686233	0.529406633	-1.879602658	0.169232241	-1.129904631	0.433966935
YALI1_B08321g	YALI0B06248g	-0.101751285	0.595205524	0.092230298	0.600432195	0.167453695	0.238713842
YALI1_B08374g	NA	0.2050092	0.131580697	-0.136842765	0.296282091	-0.138184507	0.279912939
YALI1_B08401g	YALI0B06347g	0.026376671	0.86265316	0.076511955	0.494964919	0.03949168	0.74470878
YALI1_B08438g	YALI0B06369g	0.150483247	0.710038991	-0.400339662	0.15806579	-0.303912806	0.296833866
YALI1_B08461g	YALI0B06391g	0.433334337	0.662782326	-1.582622938	0.01285945	-0.441204402	0.577086204
YALI1_B08493g	YALI0B06413g	1.518347082	0.019479083	-0.151515317	0.872372563	-0.994440043	0.08655011
YALI1_B08531g	YALI0B06490g	-0.037291423	0.854439162	0.123817189	0.386176862	0.069172465	0.643843458
YALI1_B08540g	YALI0B06512g	0.163166826	0.734291828	-0.451712422	0.184026911	-0.346028389	0.320990773
YALI1_B08575g	NA	0.286421779	0.188564732	-0.339346745	0.052133217	-0.219465262	0.244567249
YALI1_B08580g	YALI0B06534g	0.20011455	0.25897221	-0.161079604	0.314779355	-0.180796255	0.226708413
YALI1_B08588g	NA	0.187400219	0.585782032	-0.086234064	0.790572189	-0.068873659	0.827947629
YALI1_B08616g	YALI0B06556g	0.256927679	0.08058611	-0.208425888	0.119795644	-0.219816633	0.080344063
YALI1_B08627g	YALI0B06578g	0.131056162	0.541780525	-0.193426072	0.262559979	-0.161785593	0.348928678
YALI1_B08650g	YALI0B06600g	-0.084225834	0.484104491	0.094306308	0.366833078	0.10660162	0.287153209
YALI1_B08699g	YALI0B06666g	-0.219392818	0.737902417	0.522801989	0.2755383	0.449823366	0.333643152
YALI1_B08721g	YALI0B06688g	-0.188585292	0.444648485	0.150239154	0.546293384	0.163624873	0.443381871
YALI1_B08758g	YALI0B06710g	-0.317671815	0.230925539	0.492222117	0.02444037	0.4017107	0.055279451
YALI1_B08783g	YALI0B06732g	-0.113229769	0.425494183	0.171095035	0.141331558	0.098014568	0.432065755
YALI1_B08801g	YALI0B06754g	0.13020724	0.286419657	-0.038206504	0.788549969	-0.108283323	0.315690552
YALI1_B08817g	YALI0B06776g	-0.075226208	0.74745594	0.202104987	0.250871976	0.131507833	0.447890162
YALI1_B08831g	YALI0B06787g	0.14622358	0.500189241	-0.051892034	0.827222973	-0.025968243	0.909914241
YALI1_B08851g	YALI0B06809g	-0.112268246	0.189555541	0.110928638	0.143348988	0.095135696	0.214214016
YALI1_B08868g	NA	0.332970085	0.452974117	-0.085372161	0.856176762	-0.023818683	0.960083368
YALI1_B08885g	YALI0B06831g	0.234347674	0.131656188	-0.268977567	0.040402434	-0.275300378	0.035816739
YALI1_B08898g	YALI0B06853g	-0.060335389	0.631614844	0.074055781	0.484554308	0.06241545	0.548231036
YALI1_B08975g	YALI0B06875g	-0.05981859	0.727024639	-0.062945632	0.680228848	-0.01742257	0.918663663
YALI1_B08978g	YALI0B06897g	0.051552969	0.67875565	-0.030631224	0.796830118	-0.040823115	0.704075121
YALI1_B09002g	YALI0B06919g	0.093789749	0.750196154	0.045858559	0.875757461	-0.0305178	0.911693602
YALI1_B09025g	YALI0B06941g	0.019590458	0.908479267	0.089253947	0.461154707	-0.031550592	0.819318309
YALI1_B09044g	YALI0B06963g	-0.01938808	0.914387457	0.072379867	0.589929762	-0.023102748	0.877873263
YALI1_B09072g	YALI0B06985g	0.084394768	0.582668532	0.065738125	0.644259034	-0.011197003	0.945859144
YALI1_B09090g	YALI0B07007g	-0.190251009	0.292627218	0.354950432	0.011043772	0.191219918	0.237380863
YALI1_B09132g	YALI0B07051g	-0.180227612	0.700787459	0.217272576	0.529453085	0.283454303	0.38553645
YALI1_B09144g	YALI0B07073g	0.147807938	0.308184242	-0.167620314	0.175512354	-0.146981771	0.223482379
YALI1_B09161g	YALI0B07095g	0.192719926	0.14090594	-0.137433926	0.271875476	-0.231313822	0.027380467
YALI1_B09211g	YALI0B07117g	0.015190484	0.983247367	0.26194205	0.598424322	0.216954491	0.670516238
YALI1_B09258g	YALI0B07161g	0.21429275	0.513229299	-0.327930158	0.205678419	-0.333348013	0.179757698
YALI1_B09266g	YALI0B07183g	0.185733445	0.261765617	-0.299980056	0.019404006	-0.225708152	0.108405974
YALI1_B09279g	YALI0B07205g	0.026736833	0.929319599	-0.137079803	0.52569913	-0.111651385	0.592676365
YALI1_B09299g	YALI0B07227g	0.117617437	0.295399455	-0.03559987	0.781016456	-0.058342967	0.592162578
YALI1_B09310g	YALI0B07249g	0.005453583	0.983247367	0.220263306	0.183774723	0.047452535	0.814184159
YALI1_B09316g	NA	0.150105015	0.662720179	-0.243708802	0.314364876	-0.123908463	0.651879168
YALI1_B09320g	YALI0B07271g	-0.232142391	0.119175728	0.137275499	0.358826112	0.274429145	0.020964123
YALI1_B09333g	YALI0B07293g	0.005802782	0.967139511	-0.025090547	0.830517675	-0.024215544	0.826616748
YALI1_B09367g	YALI0B07359g	-0.062760147	0.703028242	0.141904525	0.23412082	0.052155935	0.717333385
YALI1_B09448g	YALI0B07381g	0.006187711	0.980073324	-0.102552715	0.544044896	-0.07942312	0.636070784
YALI1_B09476g	NA	0.24278365	0.599803939	-0.202967113	0.624351249	-0.20954717	0.585407612
YALI1_B09497g	YALI0B07403g	-0.190600507	0.524940504	0.231021855	0.363157748	0.17695576	0.495209194
YALI1_B09568g	YALI0B07425g	0.006935003	0.974619038	-0.05536803	0.732359621	0.005456198	0.976533545
YALI1_B09580g	NA	-0.560985605	0.214608355	0.243797585	0.612822597	0.440641528	0.275874367
YALI1_B09591g	NA	0.316792411	0.46175998	-0.153807809	0.714916521	-0.437571762	0.167836921
YALI1_B09592g	YALI0B07447g	-0.15423637	0.181813805	0.113530756	0.300410443	0.102972073	0.359310997
YALI1_B09708g	YALI0B07513g	0.006680499	0.987245907	-0.359089635	0.209490385	-0.192506297	0.537239765
YALI1_B09807g	YALI0B07535g	-0.308016572	0.074067046	0.337743358	0.018013467	0.342406112	0.017535111
YALI1_B09837g	YALI0B07557g	0.020304867	0.822754098	-0.049929963	0.459269223	-0.038704748	0.577891559
YALI1_B09871g	NA	0.063779041	0.771435701	-0.137055005	0.396712855	-0.050201756	0.789500329
YALI1_B09894g	YALI0B07579g	-0.281875341	0.108245953	0.399458981	0.00275061	0.290574934	0.054587542
YALI1_B09929g	NA	0.270821737	0.422867806	-0.113130503	0.723517964	-0.087416003	0.788471086
YALI1_B09931g	NA	0.113044376	0.783063868	-0.092214234	0.794885674	0.019046876	0.959955626
YALI1_B09957g	NA	-0.028352385	0.932244277	0.091221832	0.729971801	0.178609696	0.397889362
YALI1_B09993g	YALI0B07601g	-0.080565274	0.730310841	0.187830847	0.284655812	0.079595424	0.692310862
YALI1_B09994g	NA	-0.166645919	0.479708336	0.263643511	0.173997372	0.164382168	0.412765719
YALI1_B10032g	YALI0B07623g	-0.229903371	0.349752743	0.331730724	0.089413971	0.193776542	0.392716871
YALI1_B10094g	YALI0B07645g	0.802181477	0.026190237	-0.447696135	0.210389735	-0.791528971	0.00424698
YALI1_B10119g	NA	0.14203528	0.734406352	0.072279194	0.870946091	-0.111583107	0.759664195
YALI1_B10130g	YALI0B07667g	0.06425305	0.640794963	-0.068509301	0.560758823	-0.083909902	0.432706747
YALI1_B10145g	YALI0B07689g	-0.008842866	0.963343423	0.051044712	0.726941616	0.017645668	0.909706131
YALI1_B10170g	NA	0.471288835	0.088162998	-0.39563997	0.079984851	-0.39231101	0.077339785
YALI1_B10182g	YALI0B07711g	0.262040357	0.293085509	-0.274918421	0.19208984	-0.289593914	0.143778984
YALI1_B10185g	NA	0.066772717	0.9108163	0.509098023	0.194648274	0.317662222	0.409256057
YALI1_B10231g	YALI0B07755g	-0.513781416	0.297924723	0.65084877	0.125084167	0.456758498	0.304663507
YALI1_B10359g	YALI0B07898g	-0.372305757	0.597731997	0.582747483	0.282790456	0.560737309	0.285849159
YALI1_B10449g	YALI0B08008g	-0.10326735	0.556686304	0.283187838	0.017316912	0.125358229	0.373272337
YALI1_B10463g	YALI0B08030g	0.082771554	0.486158004	-0.024175432	0.855427095	-0.032644884	0.787461231
YALI1_B10525g	YALI0B08052g	-0.015116675	0.974894785	-0.421410204	0.092995113	-0.215915435	0.467016403
YALI1_B10552g	YALI0B08074g	-0.079533814	0.804314549	0.132231067	0.610111385	0.030287388	0.920173689
YALI1_B10582g	YALI0B08096g	-0.007395853	0.956331895	0.066267145	0.473934083	0.021253233	0.84388341
YALI1_B10607g	YALI0B08118g	-0.223822672	0.12805134	0.154366659	0.270879365	0.183461019	0.17562108
YALI1_B10635g	YALI0B08140g	-0.158728943	0.754472087	0.229170846	0.584219325	0.1235337	0.790804699
YALI1_B10751g	YALI0B08162g	0.053504375	0.882370373	-0.188265812	0.471901086	-0.022934411	0.943195204
YALI1_B10757g	NA	0.016383076	0.980478081	-0.378921694	0.412600153	0.111431381	0.83140478
YALI1_B10762g	NA	0.264749031	0.452087215	-0.356657794	0.185074991	-0.238796648	0.404039108
YALI1_B10773g	NA	0.113669557	0.753669637	-0.375737581	0.106974614	-0.242883961	0.331674281
YALI1_B10780g	NA	0.055961198	0.889920937	-0.106250423	0.750658654	-0.033274389	0.925678978
YALI1_B10782g	NA	0.476426521	0.225865076	-0.425034916	0.184714587	-0.568513244	0.047308868
YALI1_B10813g	YALI0B08184g	-0.240428895	0.542930145	0.249143387	0.466961076	0.183564256	0.614051632
YALI1_B10891g	YALI0B08206g	-0.338193053	0.038337412	0.324070417	0.035075727	0.386823734	0.003302403
YALI1_B10933g	NA	-0.295707957	0.254788687	0.372104693	0.110104806	0.395554087	0.04941176
YALI1_B10943g	NA	-0.451600554	0.187816132	0.431653543	0.184962817	0.529593699	0.05425064
YALI1_B10990g	YALI0B08228g	-0.040688271	0.776507327	0.098433762	0.354811596	0.034705454	0.779106948
YALI1_B11034g	NA	0.159447686	0.715507627	-0.449545593	0.130752103	-0.3286282	0.282953015
YALI1_B11083g	YALI0B08250g	-0.110772285	0.380079294	0.082798627	0.48931306	0.068082903	0.581079183
YALI1_B11111g	NA	-0.078464495	0.716987396	0.190625614	0.241041421	0.152162416	0.338777858
YALI1_B11120g	NA	0.024673231	0.896674418	0.021586101	0.90432062	0.002353866	0.990882513
YALI1_B11131g	YALI0B08272g	-0.388097803	0.150101769	0.526263679	0.01389145	0.456505273	0.041598873
YALI1_B11167g	YALI0B08294g	0.122418439	0.526854804	-0.027673892	0.895502518	-0.002924421	0.990502096
YALI1_B11183g	YALI0B08316g	0.161213416	0.246582418	-0.051619937	0.744217396	-0.163273035	0.157863545
YALI1_B11200g	YALI0B08338g	0.201505265	0.398123666	-0.376226244	0.040316482	-0.217541743	0.297624336
YALI1_B11388g	YALI0B08360g	0.004847813	0.989165564	-0.275298193	0.284142201	-0.152984633	0.584804942
YALI1_B11398g	YALI0B08382g	0.039084143	0.857613481	-0.056537386	0.751051881	-0.06699546	0.677146121
YALI1_B11402g	YALI0B08404g	0.001985736	0.988413533	0.012349109	0.927032143	-0.014659781	0.906478875
YALI1_B11415g	YALI0B08426g	-0.08328789	0.858177466	-0.045317283	0.916479053	0.209937428	0.513761043
YALI1_B11448g	YALI0B08448g	0.083956018	0.9108163	0.129845385	0.828599658	0.118007316	0.838244567
YALI1_B11484g	YALI0B08470g	-0.193420298	0.266973656	0.294828563	0.030904672	0.189689994	0.2214877
YALI1_B11495g	YALI0B08492g	0.197284551	0.33182264	-0.199453236	0.264636441	-0.177374075	0.307499333
YALI1_B11519g	YALI0B08514g	0.059745614	0.671845906	-0.149698908	0.126629816	-0.104867496	0.307398461
YALI1_B11532g	YALI0B08536g	-0.040500377	0.796406738	0.119816075	0.274659757	0.077267853	0.522770911
YALI1_B11588g	NA	0.18609983	0.679294899	-0.208016341	0.58580711	-0.250117872	0.460244358
YALI1_B11593g	NA	0.256415846	0.361057483	-0.269003311	0.253062431	-0.115518298	0.665762538
YALI1_B11607g	YALI0B08558g	-0.298364766	0.402760995	0.595770052	0.034937489	0.393635957	0.160477844
YALI1_B11648g	YALI0B08624g	0.28373198	0.361773905	-0.444281726	0.062143061	-0.446162572	0.056682075
YALI1_B11681g	YALI0B08690g	-0.121184743	0.457493344	0.014237319	0.942023345	0.1352415	0.312611053
YALI1_B11715g	YALI0B08712g	-0.108912513	0.391118548	0.108801182	0.334403092	0.085728377	0.452280851
YALI1_B11729g	NA	0.346616898	0.216685016	-0.075223989	0.828540244	-0.358655483	0.117506376
YALI1_B11759g	YALI0B08734g	0.062565402	0.741673007	-0.026523653	0.88933754	-0.045473112	0.789860174
YALI1_B11781g	NA	0.50570628	0.164558828	-0.552645901	0.054803846	-0.601009462	0.027380467
YALI1_B11794g	YALI0B08756g	0.058448752	0.798725864	-0.15838875	0.342978119	-0.109294091	0.534085073
YALI1_B11853g	YALI0B08778g	-0.029097497	0.834451751	0.069414045	0.50601972	0.033698665	0.775540444
YALI1_B11878g	YALI0B08800g	-0.158670513	0.414495878	0.092308709	0.64078016	0.101187455	0.576538918
YALI1_B11916g	YALI0B08844g	0.164982321	0.138757821	-0.103426852	0.344823057	-0.15405363	0.110010761
YALI1_B11934g	YALI0B08866g	0.296586048	0.181813805	-0.302768467	0.12982757	-0.345506761	0.068645667
YALI1_B11960g	YALI0B08899g	-0.21711628	0.255569462	0.186666125	0.298049923	0.184980369	0.284748446
YALI1_B11983g	YALI0B08921g	0.158640686	0.227914122	-0.072259245	0.60426504	-0.156243439	0.181416049
YALI1_B12010g	YALI0B08943g	-0.010889784	0.914705393	0.009579821	0.918794847	0.013168607	0.878485283
YALI1_B12042g	YALI0B08965g	0.089586574	0.538079563	0.035340436	0.817429724	-0.02022376	0.894868187
YALI1_B12057g	YALI0B08987g	0.182409557	0.137480426	-0.191648227	0.066450527	-0.149900825	0.166827701
YALI1_B12101g	YALI0B09009g	-0.149307263	0.329703136	0.290446364	0.011129155	0.182774531	0.143519161
YALI1_B12150g	NA	0.042912196	0.88949092	0.197513964	0.384847487	0.065557946	0.791605142
YALI1_B12154g	YALI0B09031g	-0.114171455	0.739020383	0.332750428	0.205678419	0.227036308	0.369539445
YALI1_B12195g	YALI0B09053g	-0.045875266	0.690828012	0.056906353	0.556686711	0.020580845	0.850383691
YALI1_B12204g	YALI0B09075g	-0.058538595	0.866381321	0.037346864	0.908724529	-0.064100701	0.820318839
YALI1_B12243g	YALI0B09119g	-0.02359033	0.937910207	-0.05760649	0.827608984	-0.117910255	0.588488151
YALI1_B12267g	YALI0B09141g	-0.071737945	0.640681689	0.04674467	0.751537911	0.078424385	0.526539093
YALI1_B12295g	YALI0B09163g	-0.216901553	0.261138676	0.198250994	0.269451077	0.165996692	0.337577833
YALI1_B12313g	NA	0.099084037	0.801161361	0.166139947	0.605268262	-0.085620441	0.79074315
YALI1_B12337g	YALI0B09229g	-0.196973884	0.156774061	0.301087395	0.005224282	0.232230814	0.047734847
YALI1_B12375g	YALI0B09251g	0.145135814	0.559974052	-0.226828914	0.241041421	-0.126552338	0.541634224
YALI1_B12384g	NA	0.451633635	0.293123977	-0.218577067	0.605106986	-0.255779335	0.510764649
YALI1_B12409g	YALI0B09273g	0.035577365	0.878456669	0.129477985	0.4259825	-0.01723235	0.936163547
YALI1_B12427g	YALI0B09295g	-0.05150397	0.763697304	-0.051362361	0.734762695	0.007751776	0.963804723
YALI1_B12443g	YALI0B09317g	0.111986803	0.240230872	-0.044299507	0.665603283	-0.095427653	0.251561605
YALI1_B12451g	YALI0B09339g	0.093787925	0.453921868	-0.16925285	0.076962577	-0.117215319	0.250587648
YALI1_B12489g	YALI0B09361g	-0.267378237	0.578224737	0.502529074	0.139323758	0.354791206	0.33808092
YALI1_B12529g	YALI0B09383g	-0.052245817	0.70497542	-0.02044214	0.883130397	0.045420629	0.714137639
YALI1_B12633g	YALI0B09427g	0.121989269	0.628971738	0.031775429	0.903379652	-0.021280073	0.933209552
YALI1_B12677g	YALI0B09449g	0.010800324	0.971579705	-0.053106391	0.830365652	-0.031063516	0.896358236
YALI1_B12691g	YALI0B09471g	-0.003536354	0.979391249	-0.025117812	0.812975801	-0.006865674	0.951599741
YALI1_B12742g	YALI0B09515g	-0.025400817	0.878225148	-0.016599888	0.914762836	-0.014318254	0.925678978
YALI1_B12781g	YALI0B09537g	-0.341418047	0.198270298	0.380352853	0.084131523	0.361230432	0.116005413
YALI1_B12847g	YALI0B09559g	0.032623981	0.81737188	-0.051802519	0.656346095	-0.073320029	0.480102103
YALI1_B12874g	YALI0B09581g	-0.124182388	0.654158849	0.30405792	0.125084167	0.13181273	0.565219743
YALI1_B12917g	YALI0B09603g	-0.165129287	0.30066418	0.242164168	0.063604464	0.189682729	0.158386809
YALI1_B12966g	YALI0B09625g	0.101932599	0.815754289	0.128296337	0.736015309	0.03052401	0.940808566
YALI1_B12993g	YALI0B09647g	-0.131917525	0.555485139	0.208829164	0.23412082	0.171145641	0.356192837
YALI1_B13041g	YALI0B09669g	0.016429841	0.940986981	0.058193593	0.746892103	0.020804275	0.911681329
YALI1_B13069g	YALI0B09713g	0.093514288	0.578043642	-0.157802713	0.219920364	-0.136855319	0.278810284
YALI1_B13112g	YALI0B09735g	-0.033336719	0.837306354	0.072184238	0.560145697	0.051520847	0.677739685
YALI1_B13122g	YALI0B09757g	0.151292954	0.410686763	-0.180627093	0.233338079	-0.145666261	0.336564579
YALI1_B13137g	YALI0B09779g	0.185486481	0.619115491	-0.339421894	0.228096648	-0.368249521	0.165953246
YALI1_B13150g	YALI0B09812g	-0.013800194	0.915348806	-0.009817545	0.934272067	-0.002930572	0.980089369
YALI1_B13179g	YALI0B09845g	0.021862834	0.850011716	0.030500931	0.7537317	-0.014448941	0.888705824
YALI1_B13259g	YALI0B09867g	-0.18304941	0.425494183	0.121488454	0.599833554	0.195478021	0.303024512
YALI1_B13290g	YALI0B09889g	0.142659673	0.152571133	-0.127534424	0.154042281	-0.121840924	0.160740368
YALI1_B13328g	YALI0B09955g	-0.477276368	0.019479083	0.133418364	0.606387729	0.411340777	0.025329788
YALI1_B13355g	YALI0B09977g	-0.023730368	0.830676915	0.050549275	0.548213782	0.037572566	0.662676175
YALI1_B13401g	NA	1.046471364	0.24895854	-0.810600089	0.23412082	-1.097385179	0.080029182
YALI1_B13411g	NA	0.537637331	0.238606687	-0.200609972	0.670995803	-0.395552692	0.309761212
YALI1_B13439g	YALI0B09991g	-0.29542524	0.237862446	0.212759045	0.367439769	0.317396345	0.139247136
YALI1_B13483g	YALI0B09999g	0.357479584	0.088213102	-0.416864217	0.011129155	-0.416470713	0.008497599
YALI1_B13536g	YALI0B10021g	0.152315233	0.189555541	-0.069286984	0.573388294	-0.157838061	0.105376554
YALI1_B13556g	YALI0B10043g	-0.073493901	0.556686304	0.084710077	0.429918973	0.123637102	0.192325094
YALI1_B13586g	YALI0B10065g	0.114778828	0.737445865	-0.187727591	0.507594652	-0.213733136	0.414354369
YALI1_B13614g	YALI0B10087g	0.207059416	0.70497542	-0.153439888	0.754586893	-0.03309926	0.949712886
YALI1_B13641g	YALI0B10109g	-0.348940539	0.398385796	0.373705934	0.296282091	0.433014814	0.18435653
YALI1_B13662g	YALI0B10131g	0.055621627	0.7805964	-0.034356322	0.856347184	-0.020296589	0.911681329
YALI1_B13699g	YALI0B10153g	-0.288699207	0.293628719	0.078444933	0.807559006	0.224356828	0.38288877
YALI1_B13723g	YALI0B10175g	0.159406425	0.675561623	-0.034486984	0.931228233	-0.055355088	0.874872337
YALI1_B13737g	YALI0B10197g	0.096066595	0.757731588	-0.341738627	0.100051116	-0.208500136	0.356192837
YALI1_B13800g	YALI0B10219g	-0.026935409	0.913921822	-0.187562579	0.24451978	-0.07449105	0.693239072
YALI1_B13828g	YALI0B10241g	-0.039324272	0.802539158	-0.070166268	0.568283044	0.010716544	0.943370483
YALI1_B13886g	YALI0B10263g	0.073475462	0.735633655	-0.138401752	0.394993734	-0.123256085	0.441779888
YALI1_B13888g	YALI0B10274g	0.059377974	0.748717617	-0.028907523	0.8750323	-0.030592055	0.857493836
YALI1_B13915g	YALI0B10296g	0.001616626	0.994020721	-0.179997292	0.384847487	-0.102252833	0.644422223
YALI1_B13917g	YALI0B10318g	0.109755285	0.473770384	-0.095964382	0.486321231	-0.112299453	0.373863082
YALI1_B13948g	YALI0B10340g	-0.048571536	0.737445865	0.061175454	0.613988325	0.063156265	0.604713914
YALI1_B13973g	YALI0B10362g	-0.092308561	0.43655664	0.146223543	0.127195862	0.123359086	0.211442321
YALI1_B14013g	YALI0B10384g	0.281358279	0.205940222	-0.356700436	0.046245215	-0.338214705	0.053733577
YALI1_B14044g	YALI0B10406g	0.001253938	0.992853865	0.001108638	0.994037136	-0.037925604	0.789500329
YALI1_B14064g	YALI0B10428g	-0.093871144	0.330266226	0.075133185	0.408179599	0.110891614	0.169082865
YALI1_B14121g	YALI0B10450g	-0.13256785	0.322550846	0.243378974	0.016242582	0.156522858	0.175156374
YALI1_B14147g	YALI0B10472g	0.095499765	0.546445756	-0.140620919	0.267251405	-0.136496655	0.266410247
YALI1_B14150g	YALI0B10494g	-0.037953415	0.877243079	0.076369631	0.706550367	0.008047789	0.973381405
YALI1_B14187g	YALI0B10516g	0.004051599	0.979989212	0.00785851	0.953727886	-0.003630238	0.979295639
YALI1_B14194g	YALI0B10538g	-0.011169946	0.923766215	0.016560104	0.872372563	0.003092111	0.977077635
YALI1_B14236g	YALI0B10560g	0.026774493	0.923766215	-0.106400739	0.617859146	-0.103656731	0.614051632
YALI1_B14238g	YALI0B10582g	-0.019132268	0.951129935	-0.076742772	0.763282833	-0.065302801	0.789528137
YALI1_B14268g	YALI0B10604g	-0.008343381	0.99090013	-0.538771604	0.31188923	-0.440886342	0.428843592
YALI1_B14308g	NA	-0.100894544	0.513828919	0.060744969	0.694432489	0.10529745	0.407148237
YALI1_B14325g	YALI0B10692g	0.32729673	0.10494074	-0.45747651	0.00274919	-0.405871714	0.008497599
YALI1_B14355g	YALI0B10714g	-0.064450964	0.730018389	0.029349259	0.876197406	0.041936976	0.802368043
YALI1_B14382g	YALI0B10736g	-0.275443432	0.231840508	0.294707968	0.138719524	0.238009799	0.26202252
YALI1_B14418g	YALI0B10758g	0.202739102	0.199501876	-0.295188273	0.016499776	-0.276754479	0.027380467
YALI1_B14441g	YALI0B10780g	-0.089824079	0.58096436	0.070013864	0.64078016	0.061128412	0.687714489
YALI1_B14492g	YALI0B10802g	-0.105445499	0.237862446	0.097063799	0.232533835	0.126465703	0.087933312
YALI1_B14510g	NA	0.246986206	0.584053339	-0.245350501	0.503047579	-0.121484549	0.76514891
YALI1_B14517g	YALI0B10824g	0.125766705	0.637543876	-0.127499835	0.568136773	-0.111819315	0.604349085
YALI1_B14544g	YALI0B10846g	0.220002849	0.697864289	-0.670509396	0.037613602	-0.438995299	0.234231029
YALI1_B14573g	YALI0B10890g	0.102492706	0.649995836	-0.088556531	0.662210942	-0.039219758	0.857085926
YALI1_B14600g	YALI0B10912g	0.053045062	0.624276942	-0.063988886	0.47487396	-0.071385658	0.39027385
YALI1_B14615g	YALI0B10934g	-0.058693821	0.628323833	-0.010876512	0.934185813	0.030274705	0.791426368
YALI1_B14645g	YALI0B10956g	-0.017369737	0.938668926	0.164962084	0.273118345	0.119157462	0.421107411
YALI1_B14658g	YALI0B10978g	-0.044287449	0.789627573	0.080869791	0.539779922	0.055320267	0.67641949
YALI1_B14680g	YALI0B11000g	0.004066417	0.988604158	-0.020799149	0.941852463	-0.088121369	0.707050927
YALI1_B14686g	YALI0B11022g	0.082714605	0.682148884	-0.04957199	0.79960876	-0.076004462	0.652164202
YALI1_B14733g	YALI0B11044g	-0.053087252	0.716369304	0.073591909	0.556686711	0.092345651	0.421391273
YALI1_B14752g	YALI0B11066g	0.107309249	0.52174352	-0.052732498	0.754985742	-0.08062276	0.580216263
YALI1_B14793g	YALI0B11088g	0.122459798	0.349556713	-0.199912301	0.051499289	-0.130001502	0.249297152
YALI1_B14804g	YALI0B11132g	0.108373848	0.414495878	-0.196666846	0.047768666	-0.107580288	0.337577833
YALI1_B14826g	YALI0B11154g	0.000700833	0.994020721	-0.001384768	0.990198523	0.000521384	0.996701218
YALI1_B14844g	YALI0B11176g	0.038585827	0.850365266	-0.081225522	0.599833554	-0.001280205	0.995761518
YALI1_B14882g	YALI0B11220g	0.012385425	0.929395818	-0.043420198	0.688462855	0.006687247	0.956353125
YALI1_B14924g	YALI0B11242g	-0.085601373	0.668269719	0.139986414	0.354555942	0.130176281	0.397817445
YALI1_B14959g	NA	0.024892228	0.952164549	0.146513838	0.645808687	-0.073219176	0.825848458
YALI1_B14978g	YALI0B11286g	0.130956679	0.330507985	-0.156983649	0.17020457	-0.154559819	0.153553626
YALI1_B14993g	YALI0B11308g	0.197053853	0.131656188	-0.069756341	0.624506789	-0.146499667	0.205764065
YALI1_B15015g	YALI0B11330g	-0.118686108	0.683948135	0.102032367	0.705371813	0.103551165	0.682340883
YALI1_B15036g	NA	0.090909596	0.869323687	-0.334254112	0.311497215	-0.214839477	0.561982606
YALI1_B15072g	YALI0B11352g	0.098213068	0.405993996	-0.124761946	0.208083121	-0.096283357	0.339801651
YALI1_B15092g	YALI0B11374g	0.051799248	0.637726344	-0.094517675	0.260563993	-0.060808774	0.500388597
YALI1_B15109g	YALI0B11396g	0.017696268	0.975074032	-0.332720446	0.34785895	-0.235528237	0.523988987
YALI1_B15151g	YALI0B11418g	-0.201485972	0.202031205	0.059684007	0.752552099	0.1933483	0.168336543
YALI1_B15180g	YALI0B11440g	-0.037837632	0.795388785	-0.061243922	0.599833554	0.045717475	0.699429154
YALI1_B15192g	YALI0B11462g	0.243653066	0.184330933	-0.354221707	0.013547139	-0.279788867	0.062784062
YALI1_B15237g	YALI0B11484g	-0.051281332	0.543198334	0.039942343	0.60522075	0.037795219	0.614051632
YALI1_B15275g	YALI0B11506g	-0.023617235	0.876068473	0.103120676	0.314364876	0.059993875	0.588392439
YALI1_B15301g	NA	0.017679958	0.93621493	-0.031080793	0.8750323	0.016905017	0.930219687
YALI1_B15307g	YALI0B11528g	0.142751668	0.43655664	-0.268748002	0.042971895	-0.117166144	0.456273589
YALI1_B15310g	YALI0B11550g	0.006884533	0.962051832	-0.015644004	0.902536846	0.030525337	0.783904559
YALI1_B15346g	YALI0B11572g	-0.001882217	0.986930531	0.082763366	0.290898556	0.055806995	0.498941326
YALI1_B15380g	YALI0B11594g	-0.151197287	0.206615682	0.20566113	0.031202967	0.191511245	0.048994561
YALI1_B15420g	YALI0B11616g	-0.143684701	0.670449755	0.065720377	0.854849702	0.238828208	0.328103163
YALI1_B15440g	YALI0B11616g	-0.224903748	0.240230872	0.358093542	0.017514274	0.329060991	0.025355262
YALI1_B15475g	YALI0B11660g	0.237455021	0.111498367	-0.262446504	0.03206623	-0.213613901	0.087064452
YALI1_B15482g	YALI0B11682g	-0.032442659	0.717795213	0.001370616	0.987731507	0.041673277	0.573528571
YALI1_B15509g	YALI0B11704g	0.050366919	0.689254654	0.088873753	0.358826112	0.010732452	0.933755534
YALI1_B15521g	YALI0B11726g	0.073686918	0.470739743	-0.016862184	0.884132333	-0.025766429	0.805625838
YALI1_B15560g	YALI0B11748g	-0.030520224	0.809120352	0.092871919	0.292789547	0.100049574	0.229646104
YALI1_B15587g	YALI0B11770g	0.075663211	0.857613481	-0.208393258	0.508017201	-0.198866695	0.510998664
YALI1_B15592g	YALI0B11792g	-0.137603807	0.719238095	0.230756803	0.466557586	0.326301654	0.219218053
YALI1_B15624g	YALI0B11814g	0.085525979	0.648570857	-0.063096632	0.714916521	-0.109666462	0.451881354
YALI1_B15655g	YALI0B11836g	-0.036537974	0.702030921	0.011680863	0.906257745	0.051867359	0.487680467
YALI1_B15692g	YALI0B11880g	0.009650577	0.979865067	-0.106735169	0.706479733	-0.098306405	0.719100234
YALI1_B15706g	YALI0B11902g	0.083355056	0.865891088	-0.063590455	0.877465042	-0.10441633	0.779662177
YALI1_B15733g	YALI0B11913g	0.215240274	0.603834672	0.240722844	0.504116395	-0.140573809	0.711725147
YALI1_B15742g	YALI0B11924g	-0.126980086	0.489072459	0.157176359	0.318556119	0.169308484	0.24771758
YALI1_B15792g	YALI0B11946g	-0.104080641	0.452379794	0.131856045	0.253734861	0.132906212	0.254340185
YALI1_B15852g	YALI0B11968g	-0.036832556	0.828499091	-0.03444087	0.821789644	-0.009010393	0.954928536
YALI1_B15887g	YALI0B12034g	0.128881155	0.37154157	-0.124996864	0.316063482	-0.108120494	0.381841208
YALI1_B15905g	YALI0B12056g	0.013253039	0.930145419	-0.02157335	0.873687614	0.002390866	0.986245848
YALI1_B15928g	YALI0B12078g	0.037542948	0.823825794	-0.082852461	0.522104501	-0.092709083	0.438871185
YALI1_B15943g	YALI0B12100g	-0.007601279	0.956331895	-0.091414555	0.306500848	0.0192437	0.866842579
YALI1_B15964g	YALI0B12122g	0.213975323	0.218196729	-0.189926375	0.227187348	-0.176948187	0.243685389
YALI1_B15988g	YALI0B12144g	-0.0663024	0.576277926	0.038825232	0.738400338	0.08769696	0.344864346
YALI1_B15996g	YALI0B12166g	0.089459613	0.612343128	-0.001817879	0.991736184	-0.075963772	0.631628021
YALI1_B16022g	YALI0B12188g	-0.064079226	0.685536161	0.031810647	0.838260702	0.052163586	0.715244059
YALI1_B16068g	YALI0B12210g	0.101645195	0.31384038	-0.014010349	0.91255917	-0.094794696	0.29454847
YALI1_B16110g	YALI0B12276g	-0.016957363	0.959164895	-0.114553242	0.642003575	-0.083299696	0.739826052
YALI1_B16158g	YALI0B12298g	-0.065836425	0.642493014	-0.003540435	0.979080949	0.069274327	0.547424254
YALI1_B16194g	YALI0B12320g	-0.108137703	0.651062154	0.165196022	0.39063376	0.055200541	0.802747127
YALI1_B16239g	YALI0B12342g	0.01514296	0.934297358	-0.125135072	0.306434673	-0.056245752	0.69736554
YALI1_B16277g	YALI0B12364g	-0.146255869	0.215366462	0.237636156	0.009925866	0.166598199	0.097338405
YALI1_B16309g	YALI0B12386g	0.468080674	0.050112745	-0.078451765	0.806640343	-0.332546357	0.13505256
YALI1_B16318g	YALI0B12408g	-0.102049171	0.311661806	0.128683969	0.135874263	0.121504995	0.149944468
YALI1_B16375g	YALI0B12430g	0.098684543	0.764969957	-0.311493214	0.156943324	-0.229258986	0.321175237
YALI1_B16410g	YALI0B12452g	0.097652412	0.336130745	-0.075798727	0.428877712	-0.060527726	0.529577986
YALI1_B16419g	YALI0B12474g	0.009629143	0.968415647	-0.00956555	0.96414121	-0.04307663	0.829210357
YALI1_B16446g	YALI0B12496g	-0.062000035	0.486158004	0.014829895	0.882597332	0.031823974	0.716312364
YALI1_B16477g	YALI0B12518g	0.004100129	0.979690866	0.003120181	0.979465648	-0.004983297	0.971894599
YALI1_B16504g	YALI0B12540g	-0.138051976	0.322537252	0.124596909	0.335739971	0.120068704	0.331674281
YALI1_B16544g	YALI0B12562g	0.060183549	0.715966077	-0.098120623	0.466017499	-0.10062957	0.444449647
YALI1_B16566g	NA	-0.068661702	0.878911301	0.114765686	0.77279148	0.144359719	0.672029393
YALI1_B16572g	NA	-0.288360266	0.291149755	0.369143741	0.122924854	0.295902428	0.196775027
YALI1_B16578g	NA	-0.217617961	0.380079294	0.295685527	0.163588252	0.280420724	0.163184956
YALI1_B16584g	YALI0B12584g	0.023479133	0.833866538	0.008524488	0.935786161	-0.015386857	0.878114043
YALI1_B16645g	YALI0B12606g	-0.270429482	0.163142306	0.206559528	0.266904904	0.243020272	0.146182009
YALI1_B16687g	YALI0B12628g	0.024029522	0.900950274	-0.048738066	0.763699794	-0.041485351	0.789970235
YALI1_B16705g	YALI0B12694g	-0.44542842	0.122971043	0.550453457	0.022875152	0.517682203	0.027173411
YALI1_B16735g	YALI0B12694g	0.072655199	0.437871934	-0.065905598	0.446357563	-0.090644293	0.246417183
YALI1_B16808g	YALI0B12716g	-0.036416376	0.856850201	-0.042161168	0.810491377	0.033287301	0.848406355
YALI1_B16863g	YALI0B12738g	-0.081121583	0.684212989	0.077204339	0.666338307	0.057111492	0.756057644
YALI1_B16922g	YALI0B12760g	-0.120612643	0.76375843	-0.069837678	0.868006636	0.10473131	0.762375325
YALI1_B16944g	YALI0B12782g	-0.110836207	0.337490598	0.1241486	0.225667699	0.159551834	0.077890465
YALI1_B16968g	YALI0B12804g	0.324629695	0.181813805	-0.317306871	0.151597578	-0.37875187	0.069602057
YALI1_B16996g	YALI0B12826g	0.077846452	0.799982541	-0.101162587	0.697597619	-0.171161962	0.456273589
YALI1_B17008g	YALI0B12848g	0.18314224	0.50119757	-0.267391823	0.233702336	-0.273702745	0.214351877
YALI1_B17039g	YALI0B12870g	0.172092413	0.368458104	-0.27978909	0.054841827	-0.229668299	0.121459142
YALI1_B17050g	YALI0B12892g	0.013802572	0.940223165	-0.023430319	0.886380069	-0.018868462	0.906313188
YALI1_B17105g	YALI0B12914g	-0.127263928	0.161538675	0.103585207	0.225162134	0.104840159	0.196139433
YALI1_B17112g	YALI0B12936g	-0.06906908	0.564953006	0.047485149	0.676808913	0.056471344	0.591110736
YALI1_B17132g	YALI0B12958g	0.078543246	0.756247608	0.011938575	0.961775935	-0.130769364	0.497018762
YALI1_B17155g	YALI0B12980g	-0.207910302	0.480071925	0.153340285	0.583489834	0.282121769	0.21567371
YALI1_B17261g	YALI0B13046g	0.079372733	0.876068473	-0.111941511	0.768526182	-0.117095687	0.754668797
YALI1_B17285g	NA	-0.087381852	0.701503453	0.177161398	0.318679738	0.141550275	0.397484362
YALI1_B17292g	NA	0.049016153	0.803126758	-0.11691953	0.429918973	-0.026685203	0.876458948
YALI1_B17406g	YALI0B13112g	0.840598669	0.361057483	-0.901709094	0.165702139	-0.857905357	0.179757698
YALI1_B17441g	YALI0B13134g	0.358165631	0.302688904	0.075785174	0.851799457	-0.141027906	0.676206115
YALI1_B17493g	YALI0B13156g	-0.017379176	0.885308623	0.033979162	0.733353357	0.017922338	0.868560779
YALI1_B17518g	YALI0B13178g	0.014356726	0.929434753	0.115485232	0.272440968	0.062359798	0.581079183
YALI1_B17569g	YALI0B13200g	0.077490483	0.758468151	-0.07063465	0.752549843	-0.114808292	0.551396344
YALI1_B17592g	YALI0B13222g	0.08177162	0.688277846	-0.091604525	0.600243702	-0.109439547	0.497018762
YALI1_B17660g	YALI0B13288g	-0.182927599	0.529404827	0.427150608	0.044242863	0.230098757	0.326725755
YALI1_B17695g	YALI0B13310g	-0.111297271	0.307921876	0.146221962	0.114408519	0.149370538	0.095178387
YALI1_B17724g	YALI0B13332g	0.196198278	0.276720204	-0.12264811	0.488851256	-0.14955788	0.352211691
YALI1_B17773g	YALI0B13354g	-0.118306558	0.682443193	0.20390705	0.378396165	0.187269098	0.391785303
YALI1_B17805g	YALI0B13376g	0.047349718	0.843542529	0.047989161	0.823231542	0.010702627	0.960983847
YALI1_B17838g	YALI0B13398g	-0.022228289	0.896165139	0.0180451	0.909399619	0.01430548	0.926613075
YALI1_B17871g	YALI0B13420g	0.065759861	0.604280332	0.061080707	0.590716099	-0.040838193	0.729556717
YALI1_B17908g	YALI0B13442g	-0.081281285	0.70497542	0.008113114	0.968887728	0.034619711	0.867259076
YALI1_B17927g	YALI0B13464g	-0.04290802	0.733448472	-0.015913303	0.903917458	0.042792731	0.699429154
YALI1_B17964g	YALI0B13486g	0.102821758	0.712993392	-0.246109913	0.222722866	-0.174339435	0.400686775
YALI1_B17968g	YALI0B13508g	0.364630123	0.321347296	-0.345020135	0.280367076	-0.45520994	0.112423954
YALI1_B17990g	YALI0B13530g	-0.072488394	0.465154957	0.124759021	0.111912505	0.125648643	0.099733677
YALI1_B17998g	NA	0.225636714	0.601819222	0.131637995	0.755001656	-0.080821121	0.84388341
YALI1_B18012g	YALI0B13552g	0.038153269	0.841771543	-0.03850373	0.820850476	-0.068956325	0.636185042
YALI1_B18069g	YALI0B13618g	-0.184760372	0.131656188	0.088539503	0.482831028	0.134021943	0.24510234
YALI1_B18134g	YALI0B13640g	-0.218183429	0.122971043	0.172994067	0.183518407	0.244072861	0.039016989
YALI1_B18190g	YALI0B13662g	0.0925216	0.582671577	-0.168807326	0.185422515	-0.151285789	0.22404283
YALI1_B18205g	YALI0B13684g	0.334726061	0.208377593	-0.297628432	0.208086461	-0.282981984	0.212737748
YALI1_B18207g	YALI0B13706g	0.053855583	0.644213716	-0.011194485	0.929863381	-0.076217557	0.393655964
YALI1_B18236g	YALI0B13728g	-0.0466893	0.947445817	0.238444923	0.606999206	0.291993848	0.522770911
YALI1_B18260g	YALI0B13750g	0.132663894	0.489072459	-0.201923803	0.184755189	-0.185271083	0.212704694
YALI1_B18265g	YALI0B13772g	0.062469004	0.753669637	-0.042127933	0.823953545	-0.100842811	0.49935558
YALI1_B18292g	YALI0B13794g	0.140466367	0.735979357	-0.344618054	0.233702336	-0.251627101	0.394912784
YALI1_B18311g	YALI0B13816g	0.02983757	0.9108163	0.126051584	0.518413929	0.054502142	0.797754435
YALI1_B18347g	YALI0B13838g	-0.076201409	0.72293543	0.174012872	0.271333825	0.162304032	0.320531479
YALI1_B18368g	YALI0B13860g	0.357369617	0.102382451	-0.341396675	0.056653389	-0.385587546	0.021580511
YALI1_B18375g	NA	-0.045880413	0.901723851	0.203085901	0.455625523	0.091178682	0.753673425
YALI1_B18384g	YALI0B13882g	0.117277018	0.57791315	-0.102188436	0.588172986	-0.139225695	0.415006585
YALI1_B18451g	YALI0B13904g	-0.075273073	0.543840969	0.067755484	0.54897169	0.117037756	0.223476693
YALI1_B18460g	YALI0B13926g	-0.004058892	0.981432109	0.033232968	0.818557086	-0.017461824	0.905021447
YALI1_B18472g	YALI0B13948g	0.058260511	0.791848196	0.037521054	0.863743682	0.011207808	0.958261523
YALI1_B18499g	YALI0B13970g	-0.326717858	0.061674373	0.368658483	0.010849049	0.382143794	0.005612682
YALI1_B18536g	YALI0B13992g	-0.122595472	0.47425755	0.219682065	0.106175539	0.189033702	0.152979929
YALI1_B18572g	YALI0B14014g	-0.10532393	0.725689043	0.273600876	0.196279731	0.211577242	0.354731718
YALI1_B18607g	YALI0B14036g	0.069442353	0.531507979	-0.071328448	0.464773135	-0.072750685	0.436098992
YALI1_B18613g	YALI0B14058g	0.10176221	0.679969948	0.046686053	0.853073312	-0.015703049	0.94949209
YALI1_B18631g	YALI0B14080g	0.233905381	0.150101769	-0.139758485	0.372449176	-0.111176612	0.487680467
YALI1_B18645g	YALI0B14102g	-0.233263777	0.160918348	0.292251414	0.032159811	0.276747044	0.047258627
YALI1_B18687g	YALI0B14124g	0.205288885	0.184249743	-0.084077527	0.604087392	-0.098407338	0.510998664
YALI1_B18707g	YALI0B14146g	-0.024344792	0.911192368	0.010198571	0.958774021	-0.005515605	0.978861764
YALI1_B18727g	YALI0B14179g	0.034789355	0.917130616	-0.15117152	0.53184236	-0.097708367	0.695969287
YALI1_B18741g	YALI0B14201g	-0.168982532	0.419142464	0.182730752	0.311497215	0.121791376	0.537427297
YALI1_B18764g	YALI0B14223g	-0.068404643	0.71593558	0.247650642	0.044539441	0.155348844	0.239385355
YALI1_B18798g	YALI0B14245g	-0.137709824	0.146752075	0.146237529	0.073417991	0.139648699	0.08035383
YALI1_B18811g	YALI0B14267g	-0.004645219	0.977764473	0.060051864	0.596926032	0.04224026	0.722371504
YALI1_B18845g	YALI0B14289g	-0.605133586	0.019479083	0.591023357	0.014908019	0.697666436	0.000153919
YALI1_B18854g	YALI0B14311g	-0.191201807	0.333708672	-0.075757058	0.726448053	0.06226689	0.769749213
YALI1_B18887g	YALI0B14333g	-0.00463208	0.983247367	-0.008737567	0.96384677	-0.007187666	0.971771985
YALI1_B18902g	YALI0B14355g	-0.089574938	0.495810601	0.030479232	0.832930057	0.119239449	0.266410247
YALI1_B18921g	NA	-0.034620968	0.963382178	0.783431235	0.101027429	0.147736906	0.794796274
YALI1_B18930g	YALI0B14377g	-0.011881789	0.930145419	-0.028541484	0.799459909	-0.000337626	0.998182781
YALI1_B18955g	YALI0B14399g	0.00319131	0.979690866	0.017756537	0.864095161	-0.001441515	0.990882513
YALI1_B18971g	YALI0B14421g	0.124192788	0.757268785	-0.103559615	0.776100226	-0.178210834	0.552457582
YALI1_B18975g	YALI0B14443g	-0.165106403	0.131945358	0.189612886	0.039236763	0.200232263	0.025329788
YALI1_B19021g	YALI0B14465g	-0.151157255	0.124600306	0.141150955	0.108370796	0.153738338	0.063492157
YALI1_B19044g	YALI0B14487g	0.005019178	0.971671724	-0.080763167	0.362925223	-0.05592395	0.563114742
YALI1_B19079g	YALI0B14509g	-0.205070435	0.357064668	0.277565302	0.129459656	0.201449782	0.3128995
YALI1_B19107g	YALI0B14531g	-0.138210218	0.267458625	0.217636155	0.029357097	0.207575112	0.03049182
YALI1_B19120g	YALI0B14553g	0.089068792	0.518652679	-0.072121112	0.568742971	-0.01532175	0.918143907
YALI1_B19143r	YALI0B14567r	-0.160502873	0.795050586	0.724183051	0.110104806	0.148106633	0.776212565
YALI1_B19153g	YALI0B14575g	0.16646144	0.569171553	-0.082499113	0.760109196	-0.129448251	0.587980607
YALI1_B19205g	YALI0B14597g	-0.00374097	0.978302524	0.013380906	0.909229074	0.018345033	0.867783709
YALI1_B19217g	YALI0B14619g	0.057633734	0.803126758	0.018672273	0.934411216	0.024272177	0.908689303
YALI1_B19276g	YALI0B14641g	-0.104225627	0.407350877	0.19184574	0.037472023	0.156814269	0.120526968
YALI1_B19290g	YALI0B14663g	0.044201642	0.661246161	-0.016742627	0.871604078	-0.054435251	0.498746379
YALI1_B19323g	YALI0B14685g	-0.274173557	0.264921559	0.348337509	0.086870299	0.327766766	0.117323879
YALI1_B19326g	NA	0.057535519	0.838622039	0.04511341	0.863918227	-0.036441152	0.878298207
YALI1_B19336g	YALI0B14707g	0.17390625	0.291385724	-0.116636974	0.466382123	-0.17583046	0.203109723
YALI1_B19348g	YALI0B14729g	0.191963733	0.369232744	-0.071559399	0.761178041	-0.122194717	0.539137914
YALI1_B19388g	YALI0B14751g	-0.052321429	0.862430196	-0.030550134	0.9153448	0.016673708	0.951856476
YALI1_B19390g	YALI0B14773g	0.213041488	0.162841971	-0.163995779	0.246228034	-0.192033634	0.134973892
YALI1_B19429g	YALI0B14795g	-0.101471635	0.505779821	0.089879614	0.515099796	0.047548313	0.758212096
YALI1_B19453g	NA	0.176033801	0.304536753	-0.191323696	0.194081238	-0.167121973	0.246654182
YALI1_B19485g	YALI0B14817g	-0.04034973	0.784748365	0.116009529	0.271729149	0.056963428	0.630966305
YALI1_B19490g	YALI0B14839g	0.094848394	0.566067677	-0.079393675	0.587367166	-0.023329614	0.888499435
YALI1_B19507g	YALI0B14861g	0.031539288	0.81108929	0.003680472	0.976435723	-0.04679267	0.666198396
YALI1_B19520g	YALI0B14883g	0.011231309	0.956804207	-0.025218758	0.887608171	-0.012715537	0.943111253
YALI1_B19567g	YALI0B14905g	0.140338385	0.342197649	-0.273070367	0.011295865	-0.207931391	0.069762351
YALI1_B19576g	YALI0B14927g	0.115787971	0.399354979	-0.176918148	0.106219099	-0.123000757	0.29072387
YALI1_B19602g	YALI0B14949g	-0.077645768	0.400787589	0.04325276	0.644784023	0.069952699	0.394673186
YALI1_B19668g	YALI0B14971g	-0.192564553	0.218196729	0.298765019	0.014579557	0.234915237	0.074079716
YALI1_B19713g	YALI0B14993g	0.023901653	0.902010056	-0.003918438	0.981222807	-0.042592373	0.789509369
YALI1_B19747g	YALI0B15015g	-0.093572748	0.345126399	0.101048712	0.249983032	0.108516229	0.191337508
YALI1_B19774g	YALI0B15037g	0.008187807	0.95005734	0.057083606	0.542630789	0.026151455	0.797584349
YALI1_B19844g	YALI0B15059g	0.04479711	0.84627636	-0.237004925	0.101027429	-0.10421457	0.547780034
YALI1_B19877g	NA	0.069801618	0.889785509	-0.213922126	0.559736118	-0.216192697	0.535451379
YALI1_B19880g	YALI0B15081g	0.117699403	0.417893295	-0.178173556	0.130886589	-0.176257789	0.13384688
YALI1_B19897g	YALI0B15103g	0.0859066	0.793651923	-0.022075716	0.94636721	-0.158745872	0.537239765
YALI1_B19932g	YALI0B15125g	0.034940834	0.85458596	-0.096581414	0.497216682	-0.065245403	0.662147473
YALI1_B19962g	YALI0B15147g	-0.020236232	0.834451751	0.005734769	0.949632829	0.038777207	0.595809367
YALI1_B20009g	YALI0B15180g	-0.137908344	0.595577532	0.289658695	0.133505036	0.164675506	0.433966935
YALI1_B20043g	YALI0B15202g	0.046870546	0.751917125	-0.037584634	0.788185854	0.005624848	0.971049932
YALI1_B20052g	YALI0B15224g	0.0397379	0.707458781	-0.027748043	0.781892712	-0.022862568	0.814321844
YALI1_B20094g	YALI0B15246g	-0.174103264	0.25591726	0.233908299	0.068356658	0.211431925	0.088639488
YALI1_B20108g	YALI0B15268g	0.315471004	0.019479083	-0.266966388	0.033971399	-0.265879597	0.029775899
YALI1_B20130g	YALI0B15290g	-0.031074246	0.883509434	0.168048208	0.241075609	0.088356113	0.570807176
YALI1_B20145g	NA	0.120448559	0.843741156	0.014083758	0.978579004	-0.032115727	0.952043293
YALI1_B20153g	YALI0B15304g	0.008020548	0.973266365	0.01096744	0.957639051	-0.043668863	0.812952057
YALI1_B20188g	YALI0B15312g	0.301285853	0.258141189	-0.49673737	0.011043772	-0.458482065	0.020964123
YALI1_B20192g	YALI0B15334g	0.210389087	0.224820105	-0.296154292	0.027609132	-0.200303721	0.168961027
YALI1_B20205g	YALI0B15356g	0.083079204	0.503982143	-0.111364556	0.268814552	-0.098823453	0.318690813
YALI1_B20242g	YALI0B15378g	-0.04266165	0.803361019	0.140203254	0.23821413	0.09739427	0.424154969
YALI1_B20243g	YALI0B15400g	0.275661815	0.259520933	-0.348925887	0.075953615	-0.34666899	0.070803813
YALI1_B20276g	YALI0B15422g	-0.111150268	0.311489637	0.135584806	0.153517254	0.076532914	0.452511581
YALI1_B20289g	YALI0B15444g	-0.189304761	0.140830432	0.218794503	0.045466607	0.191211765	0.085925645
YALI1_B20319g	YALI0B15466g	0.045121395	0.943179907	0.223186584	0.612854101	0.203065942	0.644519426
YALI1_B20337g	YALI0B15488g	0.317031589	0.246582418	-0.39005288	0.066268646	-0.332355453	0.129023681
YALI1_B20378g	YALI0B15510g	-0.090704301	0.481891271	0.022875129	0.8750323	0.053101825	0.67641949
YALI1_B20399g	YALI0B15532g	0.041751477	0.937910207	-0.115337876	0.799239608	-0.013991288	0.977077635
YALI1_B20416g	YALI0B15576g	0.025347646	0.932839288	-0.231014266	0.234584636	-0.136003074	0.514258028
YALI1_B20462g	YALI0B15598g	-0.002886339	0.984611156	0.046110813	0.70821483	0.016613262	0.905257568
YALI1_B20493g	YALI0B15620g	-0.055488026	0.733448472	-0.129561585	0.27999445	-0.017659074	0.910925103
YALI1_B20521g	YALI0B15642g	-0.061563729	0.816530073	-0.010548335	0.965968091	-0.012353737	0.961680838
YALI1_B20527g	YALI0B15664g	-0.077001013	0.404129034	0.106864961	0.163788922	0.107978276	0.142582646
YALI1_B20577g	YALI0B15686g	-0.013030221	0.908479267	-0.040717771	0.636480555	0.014860099	0.876516607
YALI1_B20589g	YALI0B15708g	-0.011824209	0.942110022	0.007280871	0.961203052	0.012902607	0.931529169
YALI1_B20634g	YALI0B15722g	0.018603634	0.883861651	-0.069851011	0.446903628	-0.029126123	0.779253254
YALI1_B20717g	YALI0B15752g	0.023454852	0.833552856	-0.090837672	0.218654498	-0.055456713	0.489768585
YALI1_B20730g	YALI0B15774g	0.019033463	0.862856891	-0.027648827	0.770254602	-0.023288079	0.800276176
YALI1_B20777g	YALI0B15818g	-0.09688248	0.26861623	0.122685235	0.09472015	0.089024727	0.249409146
YALI1_B20802g	YALI0B15840g	0.012738326	0.93621493	-0.001571755	0.99066816	-0.02093764	0.879447489
YALI1_B20834g	YALI0B15862g	0.113049862	0.304362705	-0.066548958	0.549102888	-0.088737892	0.373272337
YALI1_B20835g	YALI0B15884g	0.054610113	0.673299716	-0.063430122	0.558857996	-0.071171355	0.478277433
YALI1_B20870g	YALI0B15906g	-0.054016053	0.714769381	0.078190404	0.524465515	0.073281207	0.537427297
YALI1_B20887g	NA	0.186509432	0.188612114	-0.093065473	0.535252579	-0.130188429	0.309761212
YALI1_B20919g	YALI0B15950g	-0.009185211	0.954710093	0.02088933	0.882597332	0.056839879	0.618879759
YALI1_B20935g	YALI0B15972g	0.081242179	0.576043978	-0.132650441	0.239947774	-0.06048392	0.634770201
YALI1_B20992g	YALI0B16016g	-0.018618313	0.88937194	-0.007274907	0.953134664	0.013318086	0.911445027
YALI1_B21004g	YALI0B16038g	0.070084464	0.65917065	0.028760615	0.858525366	0.001904541	0.99241682
YALI1_B21030g	YALI0B16060g	0.010309631	0.976265823	0.111225659	0.650228077	-0.008422392	0.977077635
YALI1_B21042g	YALI0B16082g	0.191551892	0.258141189	-0.10045702	0.562078325	-0.151375314	0.308279674
YALI1_B21043g	NA	0.008453888	0.980084839	0.203514766	0.354555942	0.05259902	0.841287052
YALI1_B21070g	YALI0B16104g	0.049197526	0.807033611	-0.042913297	0.81678767	-0.084574284	0.595809367
YALI1_B21088g	YALI0B16126g	0.011620987	0.935107505	-0.142326242	0.099420134	-0.025334768	0.829836586
YALI1_B21104g	YALI0B16148g	0.042155676	0.925025281	0.277657989	0.365122235	0.216465689	0.456985068
YALI1_B21114g	YALI0B16170g	-0.007756946	0.988761861	0.43562812	0.19914155	0.393663037	0.261558494
YALI1_B21134g	YALI0B16192g	-0.034960771	0.951779116	0.139971056	0.756132133	0.173250102	0.673652771
YALI1_B21155g	YALI0B16214g	0.084356192	0.886679469	0.359460304	0.434927275	0.113038545	0.814184159
YALI1_B21194g	YALI0B16236g	0.155265252	0.19736866	-0.150143291	0.168944666	-0.167655648	0.101946671
YALI1_B21208g	YALI0B16258g	-0.0051317	0.974894785	-0.05744473	0.613608756	-0.038934689	0.74546416
YALI1_B21250g	YALI0B16280g	0.099345516	0.616821451	-0.104598664	0.535252579	-0.139150981	0.368968808
YALI1_B21275g	YALI0B16302g	0.106986163	0.282449374	-0.109989971	0.209927173	-0.084002245	0.350542416
YALI1_B21313g	YALI0B16324g	-0.103791792	0.644097576	0.123036729	0.51533733	0.065053287	0.759657096
YALI1_B21323g	YALI0B16368g	-0.001488364	0.987245907	0.025596558	0.749228629	0.027385468	0.719100234
YALI1_B21356g	YALI0B16390g	0.02839577	0.84046594	-0.013238574	0.922004201	0.00734416	0.955182536
YALI1_B21381g	YALI0B16412g	0.108587627	0.591869107	0.012832558	0.952088696	-0.072355252	0.683389612
YALI1_B21423g	YALI0B16434g	-0.019743157	0.867801458	0.051097781	0.563603547	0.052053738	0.545053117
YALI1_B21432g	YALI0B16456g	0.133491595	0.241291829	-0.155754063	0.102290674	-0.124657354	0.200705648
YALI1_B21466g	YALI0B16478g	-0.057687345	0.703978011	0.019293938	0.903549058	0.071406376	0.556933399
YALI1_B21493g	YALI0B16500g	-0.209551417	0.288384129	0.268733673	0.098125798	0.252936645	0.131166027
YALI1_B21538g	YALI0B16522g	-0.30367749	0.140039151	0.298919969	0.091111732	0.330456766	0.058454804
YALI1_B21562g	YALI0B16544g	-0.00958739	0.983247367	-0.22938151	0.488851256	-0.144286998	0.677739685
YALI1_B21594g	YALI0B16566g	0.133384587	0.714481906	-0.239190048	0.399075489	-0.170497625	0.556682754
YALI1_B21618g	YALI0B16588g	-0.18117864	0.311661806	0.179133807	0.273640026	0.143043347	0.374255999
YALI1_B21628g	YALI0B16610g	0.070415514	0.599047293	-0.134680869	0.184164511	-0.095336696	0.37096344
YALI1_B21675g	YALI0B16632g	-0.450837188	0.048640185	0.508582648	0.007270448	0.513968194	0.005612682
YALI1_B21714g	YALI0B16654g	0.127243166	0.597716845	-0.301753732	0.073429195	-0.220475105	0.216609575
YALI1_B21737g	YALI0B16676g	-0.095994125	0.741673007	0.248469062	0.250841881	0.111038369	0.646758133
YALI1_B21774g	YALI0B16698g	0.067659093	0.671845906	-0.032259387	0.838116092	-0.032982731	0.822902656
YALI1_B21787g	YALI0B16720g	0.026092444	0.840384863	-0.070074103	0.457671329	-0.011126385	0.925678978
YALI1_B21798g	YALI0B16742g	-0.021519114	0.941509548	0.043928796	0.869970043	-0.045765193	0.853259222
YALI1_B21816g	YALI0B16764g	0.186378745	0.539906568	-0.349790905	0.117478401	-0.274821961	0.226708413
YALI1_B21819g	YALI0B16786g	0.159996623	0.329429627	0.02117056	0.916479053	-0.119822061	0.406588169
YALI1_B21855g	YALI0B16808g	0.003386665	0.976369659	-0.044037258	0.571233821	-0.024440338	0.774138295
YALI1_B21885g	YALI0B16822g	0.212966345	0.107011008	-0.262516154	0.015231106	-0.225620599	0.042579895
YALI1_B21935g	YALI0B16852g	0.482668465	0.350086778	-0.600284824	0.092506788	-0.578216134	0.110010761
YALI1_B21946g	NA	0.172112865	0.422111074	-0.316358536	0.047927152	-0.205279712	0.229296394
YALI1_B21966g	YALI0B16874g	-0.076461415	0.391578169	0.080071864	0.303856419	0.094213843	0.200075845
YALI1_B22015g	YALI0B16896g	0.162434485	0.551207936	-0.236694538	0.288923061	-0.249845173	0.244054316
YALI1_B22020g	YALI0B16918g	0.004429036	0.977226652	-0.028039328	0.813219205	-0.001228885	0.993963236
YALI1_B22055g	YALI0B16940g	0.261677916	0.182319453	-0.113208317	0.572643834	-0.130498167	0.479393817
YALI1_B22060g	YALI0B16962g	0.203941387	0.164558828	-0.111725261	0.450356055	-0.171717918	0.174513244
YALI1_B22088g	YALI0B16984g	-0.027753938	0.873183997	0.06785352	0.606625198	-0.006638439	0.967901476
YALI1_B22109g	YALI0B17006g	-0.058819194	0.838491222	-0.133279071	0.545540597	-0.074393035	0.753188498
YALI1_B22158g	YALI0B17028g	-0.192189964	0.513828919	-0.024786169	0.943408064	0.209102473	0.378957484
YALI1_B22259g	YALI0B17050g	0.027904376	0.867399508	0.081806459	0.494422336	0.0461931	0.71858338
YALI1_B22266g	YALI0B17061g	0.314658763	0.071566618	-0.319386196	0.030797293	-0.285053038	0.054951724
YALI1_B22276g	YALI0B17072g	0.064433509	0.650221805	-0.104003266	0.349220535	-0.037898091	0.774017521
YALI1_B22321g	YALI0B17138g	-0.1332105	0.714481906	0.363071408	0.17913235	0.324764091	0.189136434
YALI1_B22351g	YALI0B17160g	0.009416759	0.982173137	-0.1986593	0.469822434	-0.094670805	0.758265255
YALI1_B22372g	YALI0B17182g	-0.044451717	0.858177466	0.021736512	0.928498277	0.088503239	0.630966305
YALI1_B22375g	YALI0B17204g	0.37580827	0.192344864	-0.134696068	0.648765089	-0.24489233	0.32398914
YALI1_B22391g	NA	0.047073641	0.901778021	-0.184961097	0.495372517	0.039200307	0.903999072
YALI1_B22410g	YALI0B17226g	-0.224249668	0.124736404	0.203358937	0.130789357	0.257220551	0.027380467
YALI1_B22414g	YALI0B17248g	-0.06585951	0.74259771	0.181354872	0.211073319	0.128270424	0.380670467
YALI1_B22499g	YALI0B17292g	-0.104174447	0.466122581	0.087610974	0.516937548	0.116425178	0.325268189
YALI1_B22512g	YALI0B17303g	0.06457188	0.798947484	-0.078029572	0.718206967	-0.014963215	0.94949209
YALI1_B22533g	YALI0B17314g	0.004538847	0.977764473	-0.102450668	0.294681698	-0.03268252	0.782384071
YALI1_B22549g	YALI0B17336g	-0.158402786	0.230335701	0.232734258	0.028146721	0.182672174	0.085925645
YALI1_B22561g	YALI0B17358g	0.1406346	0.181813805	-0.087866576	0.391893254	-0.09544841	0.327265048
YALI1_B22598g	YALI0B17380g	-0.080173172	0.530924035	0.158366282	0.101027429	0.09809888	0.356252419
YALI1_B22614g	YALI0B17402g	-0.138234037	0.211567234	0.115292814	0.268794248	0.118257665	0.244642072
YALI1_B22638g	YALI0B17424g	0.120620977	0.303711399	-0.155810108	0.108942927	-0.128680862	0.191405848
YALI1_B22645g	YALI0B17446g	0.122959793	0.637869063	-0.066191652	0.791780239	-0.087465758	0.697024979
YALI1_B22667g	YALI0B17468g	0.018018767	0.895067746	0.01055224	0.934411216	0.024576777	0.828012476
YALI1_B22677g	YALI0B17490g	-0.084740974	0.526389993	0.148570326	0.154319575	0.135943151	0.182477715
YALI1_B22697g	YALI0B17512g	-0.067186223	0.566347193	0.059206119	0.575696875	0.073327433	0.45128382
YALI1_B22721g	YALI0B17534g	-0.039169799	0.875356126	0.093590777	0.624735293	0.075566892	0.687149028
YALI1_B22747g	YALI0B17556g	0.090180942	0.566419768	-0.004291829	0.978779838	-0.067318764	0.621798933
YALI1_B22793g	YALI0B17622g	-0.007579393	0.960217364	0.056135219	0.607970075	0.014709623	0.911445027
YALI1_B22820g	YALI0B17644g	0.104494686	0.393457854	-0.118282442	0.262182894	-0.100011574	0.345421418
YALI1_B22853g	YALI0B17666g	-0.095262241	0.255136784	0.087010912	0.24451978	0.076283019	0.327116147
YALI1_B22883g	YALI0B17688g	0.052811067	0.704791236	0.004496442	0.973861125	-0.037628465	0.762773067
YALI1_B22905g	YALI0B17710g	0.256857597	0.081713414	-0.286035823	0.022066879	-0.244880046	0.056682075
YALI1_B22908g	YALI0B17732g	0.147477702	0.437745052	-0.154152733	0.355199097	-0.182924389	0.23900196
YALI1_B22938g	YALI0B17754g	-0.055056423	0.65322482	0.015364711	0.90612513	0.029127203	0.797584349
YALI1_B23017g	YALI0B17776g	-0.282235572	0.489072459	0.381756543	0.252785704	0.212541763	0.545739476
YALI1_B23055g	YALI0B17798g	-0.015020423	0.941509548	-0.070353393	0.65877077	-0.012337814	0.946044397
YALI1_B23061g	YALI0B17820g	0.212987541	0.511935282	-0.394626268	0.099386686	-0.352879885	0.135720953
YALI1_B23077g	YALI0B17842g	-0.102023908	0.407350877	0.10260185	0.350972563	0.149484788	0.1202155
YALI1_B23153g	YALI0B17864g	-0.009882084	0.963260961	0.068236157	0.669709975	0.050583703	0.753673425
YALI1_B23176g	YALI0B17886g	0.298871292	0.193367613	-0.468985177	0.004399847	-0.399411685	0.021339046
YALI1_B23201g	YALI0B17908g	0.019913982	0.930450927	0.012792986	0.950338377	0.045615377	0.799619683
YALI1_B23237g	YALI0B17930g	-0.09379547	0.784748365	0.122463963	0.672265055	0.083528454	0.787461231
YALI1_B23300g	YALI0B17996g	-0.344473712	0.253411216	0.532374508	0.017719852	0.364101923	0.165847364
YALI1_B23338g	YALI0B18018g	0.011861925	0.939405683	0.081748081	0.46572362	0.038466517	0.755601497
YALI1_B23351g	YALI0B18040g	0.123357668	0.307721939	-0.156316471	0.121310163	-0.134884068	0.180405498
YALI1_B23373g	YALI0B18062g	0.106092208	0.403691493	-0.10683698	0.338458703	-0.118475806	0.264781493
YALI1_B23385g	YALI0B18084g	0.32169477	0.445113125	0.025054609	0.959515896	-0.121594391	0.77120622
YALI1_B23420g	YALI0B18128g	0.113539367	0.392519812	-0.010458799	0.947621925	-0.052072268	0.686864679
YALI1_B23440g	YALI0B18150g	-0.000291924	0.998158477	0.056566588	0.587367166	-0.008849728	0.944414611
YALI1_B23443g	NA	-0.060077764	0.884599741	0.364013661	0.183518407	0.280014182	0.294485856
YALI1_B23447g	NA	0.252180946	0.363755144	-0.308494698	0.163588252	-0.139606969	0.5797548
YALI1_B23467g	YALI0B18172g	0.016318047	0.947993318	-0.183805684	0.25418396	-0.083313812	0.649489041
YALI1_B23515g	NA	0.022358129	0.961558149	-0.034425686	0.933368049	-0.115689405	0.726984961
YALI1_B23522g	YALI0B18194g	0.291871671	0.187682991	0.01904014	0.94770518	-0.184911668	0.358123901
YALI1_B23554g	NA	-0.379141376	0.187772974	0.088191809	0.809958434	0.393198125	0.096257805
YALI1_B23579g	YALI0B18216g	-0.300773526	0.427397852	0.209454261	0.563954627	0.232185806	0.484325417
YALI1_B23603g	NA	0.005996587	0.980084839	-0.030495649	0.880945724	0.024425962	0.899097044
YALI1_B23609g	YALI0B18238g	0.171443682	0.246582418	-0.183065539	0.142778955	-0.21267132	0.062195419
YALI1_B23622g	YALI0B18260g	0.033007025	0.868833475	0.074067504	0.629873124	0.032225912	0.846245375
YALI1_B23708g	YALI0B18282g	-0.226443517	0.092607611	0.204550193	0.084027468	0.158097074	0.218956864
YALI1_B23744g	NA	-0.05624692	0.785500412	0.075958123	0.657675189	0.087151772	0.579365892
YALI1_B23771g	YALI0B18298g	0.058320742	0.868538569	0.007916296	0.978958734	-0.049069029	0.869511487
YALI1_B23794g	YALI0B18304g	-0.103191287	0.465012733	-0.02687986	0.871154872	0.001390246	0.994670599
YALI1_B23798g	YALI0B18326g	0.112403046	0.742110155	-0.244281981	0.337034314	-0.243656192	0.322250021
YALI1_B23834g	YALI0B18348g	-0.036469297	0.877243079	-0.07355143	0.694432489	-0.033115741	0.871286821
YALI1_B23866g	YALI0B18370g	-0.275305899	0.482959797	0.336755304	0.310806073	0.352989786	0.250587648
YALI1_B23879g	YALI0B18392g	-0.236888749	0.265781152	0.413856294	0.013450073	0.31686067	0.059314572
YALI1_B23933g	YALI0B18414g	0.299953926	0.469149494	-0.621777025	0.035075727	-0.512220652	0.096718192
YALI1_B23939g	YALI0B18436g	0.231865514	0.301390045	-0.355814795	0.033718926	-0.321600207	0.055383348
YALI1_B23966g	YALI0B18458g	0.08875787	0.513828919	-0.118779646	0.287762428	-0.123652343	0.246654182
YALI1_B23981g	YALI0B18480g	0.025507321	0.891228855	-0.20179	0.076907294	-0.073014978	0.601876361
YALI1_B24018g	YALI0B18502g	-0.047035882	0.833369706	0.066310703	0.725046051	0.052985716	0.774017521
YALI1_B24043g	YALI0B18524g	0.036227685	0.804314549	0.070680163	0.532923504	0.048316431	0.676586775
YALI1_B24051g	YALI0B18546g	0.031679458	0.876068473	0.000992247	0.995174135	-0.0521568	0.745592077
YALI1_B24129g	NA	-0.088919453	0.7305852	0.093086164	0.689361532	0.167205844	0.39027385
YALI1_B24185g	YALI0B18568g	-0.712648275	0.019479083	0.682137827	0.012242301	0.742492113	0.00424698
YALI1_B24214g	YALI0B18590g	0.060125187	0.657549091	-0.086593714	0.412899906	-0.027838773	0.823120954
YALI1_B24218g	YALI0B18612g	0.144822607	0.268790813	-0.179304054	0.097416451	-0.124694578	0.278094656
YALI1_B24252g	YALI0B18634g	0.232980304	0.10494074	-0.286581798	0.01389145	-0.260776568	0.027380467
YALI1_B24264g	YALI0B18656g	-0.099044043	0.451805982	0.10324189	0.375608925	0.103590856	0.341120155
YALI1_B24280g	YALI0B18678g	0.070133328	0.74745594	-0.146515576	0.367318844	-0.052529863	0.779339982
YALI1_B24292g	YALI0B18700g	0.125930971	0.319438854	-0.174248767	0.09149163	-0.16068548	0.117716123
YALI1_B24335g	YALI0B18722g	-0.104028881	0.673331232	0.07037055	0.765341096	0.045093668	0.850027227
YALI1_B24351g	YALI0B18744g	0.09043545	0.70506556	0.112901001	0.579085904	-0.037206098	0.868560779
YALI1_B24424g	YALI0B18759g	-0.002846191	0.984711389	-0.009406506	0.94764061	-0.012652688	0.927792812
YALI1_B24446g	NA	0.434496825	0.399491742	-0.368143723	0.366828222	-0.412855408	0.304096198
YALI1_B24471g	YALI0B18788g	0.155111385	0.333310284	-0.242106597	0.051799464	-0.151118807	0.264033954
YALI1_B24502g	YALI0B18810g	-0.13536211	0.267458625	0.104515776	0.372821045	0.118988583	0.287153209
YALI1_B24564g	YALI0B18854g	-0.320827185	0.330737639	0.278828415	0.391893254	0.28299019	0.335333214
YALI1_B24606g	YALI0B18876g	-0.083668307	0.733448472	0.063845505	0.785272799	0.038472585	0.868316026
YALI1_B24638g	YALI0B18898g	0.114267897	0.499866464	-0.151298845	0.276788441	-0.174714132	0.175888684
YALI1_B24654g	YALI0B18920g	0.059539287	0.766714517	0.115242861	0.466961076	-0.008727445	0.96576574
YALI1_B24672g	YALI0B18942g	-0.223267128	0.41277179	0.213641731	0.402490421	0.235698428	0.294485856
YALI1_B24714g	NA	0.195104038	0.658175709	-0.230852898	0.535582119	-0.220472534	0.525406528
YALI1_B24758g	YALI0B18964g	-0.231510214	0.14419242	0.314248213	0.013656253	0.250063696	0.060644159
YALI1_B24836g	YALI0B18986g	0.217874096	0.503328331	-0.236409022	0.397374849	-0.165323415	0.574941308
YALI1_B24901g	YALI0B19008g	0.459102152	0.557169374	0.008535907	0.990198523	-0.28485643	0.641843916
YALI1_B24936g	YALI0B19030g	0.194798328	0.751313056	0.200595145	0.694432489	0.122040618	0.812952057
YALI1_B24997g	YALI0B19052g	-0.119194177	0.344541134	0.15875572	0.136183113	0.110712621	0.317507407
YALI1_B25004g	NA	-0.061500986	0.913417816	0.303047615	0.456220736	0.037938022	0.937912816
YALI1_B25017g	YALI0B19074g	0.093369748	0.311661806	-0.151487342	0.033583227	-0.105862493	0.170010277
YALI1_B25062g	YALI0B19096g	-0.058117844	0.681211145	0.032857284	0.812512862	0.058017687	0.618879759
YALI1_B25077g	NA	-0.088996341	0.753669637	0.243941242	0.227897289	0.230286801	0.229452263
YALI1_B25087g	YALI0B19118g	0.203112057	0.124736404	-0.202491621	0.071454464	-0.190712274	0.083117695
YALI1_B25107g	YALI0B19162g	0.009212423	0.95597115	-0.057512608	0.641192284	-0.016566683	0.90635553
YALI1_B25136g	YALI0B19184g	-0.068571305	0.706494712	0.010881109	0.952488908	0.03814317	0.819318309
YALI1_B25187g	YALI0B19206g	-0.073240692	0.71223885	0.005907626	0.976662788	0.013932991	0.946780685
YALI1_B25223g	YALI0B19228g	0.405980955	0.069489615	-0.311493661	0.140057929	-0.289770675	0.143519161
YALI1_B25258g	YALI0B19250g	0.062070175	0.877243079	0.210325385	0.481413086	0.004664745	0.991924704
YALI1_B25319g	NA	-0.114071005	0.708356285	0.548359778	0.005926045	0.200819931	0.372613669
YALI1_B25322g	NA	-0.136856673	0.589680862	0.22874877	0.266904904	0.244414971	0.185068108
YALI1_B25334g	NA	0.298859038	0.488361577	-0.394394648	0.250013472	-0.244620966	0.498136142
YALI1_B25360g	YALI0B19338g	-0.064266338	0.697918423	0.180266259	0.10896028	0.070899625	0.611781584
YALI1_B25387g	NA	0.060502068	0.831878259	0.144904938	0.508907819	-0.067051662	0.77120622
YALI1_B25395g	YALI0B19360g	0.045171187	0.760616136	-0.087334145	0.451832403	-0.017990777	0.898793256
YALI1_B25427g	YALI0B19382g	-0.000447679	0.998192077	-0.202877672	0.177734718	-0.057969963	0.765057988
YALI1_B25484g	YALI0B19448g	0.234199077	0.28625414	-0.266341741	0.145731182	-0.274026731	0.116627976
YALI1_B25495g	NA	0.325514325	0.124929023	-0.043209758	0.8750323	-0.251256591	0.165847364
YALI1_B25506g	YALI0B19470g	0.083697592	0.702884887	-0.076248083	0.694432489	-0.091860719	0.611362624
YALI1_B25553g	YALI0B19492g	-0.067079799	0.81008601	0.117938786	0.588526964	0.104035755	0.643271452
YALI1_B25593g	YALI0B19558g	0.153743388	0.597506314	-0.226475412	0.32527103	-0.241810904	0.271099382
YALI1_B25603g	YALI0B19580g	-0.051466881	0.70506556	0.124132849	0.202228545	0.062739276	0.572994413
YALI1_B25676g	YALI0B19602g	-0.368963991	0.137480426	0.557384116	0.005926045	0.351971401	0.092800668
YALI1_B25734g	YALI0B19624g	-0.008663149	0.964080833	-0.013431893	0.936615835	0.055059201	0.695007784
YALI1_B25744g	YALI0B19646g	0.065527958	0.684799301	-0.125117643	0.306754273	-0.047641803	0.743290213
YALI1_B25762g	YALI0B19668g	-0.109315735	0.39181669	0.067161973	0.593388797	0.087000664	0.460244358
YALI1_B25795g	YALI0B19712g	-0.169425079	0.419787588	0.368315068	0.015231106	0.228799218	0.171391218
YALI1_B25798g	YALI0B19734g	0.095364903	0.408039521	-0.036123927	0.775338966	-0.064988922	0.545166895
YALI1_B25833g	YALI0B19756g	0.080228434	0.695390669	-0.082649293	0.637463667	-0.173870246	0.24383021
YALI1_B25868g	YALI0B19778g	-0.464478567	0.090196598	0.429830767	0.080780286	0.408316374	0.088035248
YALI1_B25906g	YALI0B19800g	-0.077939142	0.69009567	0.033481772	0.866429925	0.025572505	0.896577501
YALI1_B25952g	YALI0B19844g	0.31217664	0.199501876	-0.200757453	0.365122235	-0.251279805	0.21870002
YALI1_B25963g	YALI0B19866g	0.09179325	0.651373447	-0.276934426	0.036429512	-0.118861249	0.4505681
YALI1_B25988g	YALI0B19888g	-0.151146291	0.268790813	0.058598377	0.704510981	0.095061706	0.465793792
YALI1_B25997g	YALI0B19910g	0.100226018	0.681211145	-0.219379958	0.216167001	-0.130749377	0.487680467
YALI1_B26112g	YALI0B19998g	-0.342363768	0.211847818	0.239375141	0.353539099	0.244723523	0.345886644
YALI1_B26153g	YALI0B20020g	-0.008033227	0.980084839	0.040172096	0.886290152	-0.026005475	0.926418571
YALI1_B26205g	YALI0B20064g	0.176852768	0.407940735	-0.051515312	0.831817326	-0.143475998	0.450119485
YALI1_B26235g	YALI0B20086g	-0.05155271	0.875356126	0.107454253	0.681730606	0.013619133	0.964069299
YALI1_B26271g	YALI0B20108g	-0.047607041	0.699774698	-0.024994966	0.836954066	0.030443401	0.789509369
YALI1_B26322g	YALI0B20174g	0.404555546	0.583742387	-0.008096312	0.990198523	-0.064267343	0.927103568
YALI1_B26350g	YALI0B20196g	-0.075874621	0.71223885	0.041872708	0.836954066	0.045240917	0.816432355
YALI1_B26377g	NA	0.791544085	0.028384782	-0.931199956	0.00274919	-0.871186683	0.00424698
YALI1_B26430g	YALI0B20218g	-0.050763508	0.542930145	0.039052707	0.609905191	0.050021659	0.484523106
YALI1_B26451g	YALI0B20240g	-0.02939434	0.856048429	0.123143531	0.252785704	0.036787238	0.779662177
YALI1_B26517g	YALI0B20262g	-0.129109416	0.3518884	0.111741809	0.384045657	0.108821141	0.384730782
YALI1_B26550g	YALI0B20284g	0.08272067	0.815058404	-0.052828898	0.871604078	0.018064923	0.955386039
YALI1_B26596g	YALI0B20306g	-0.173220272	0.18554218	0.178310427	0.123987118	0.171928496	0.134306249
YALI1_B26639g	YALI0B20328g	0.237651708	0.156307574	-0.282723966	0.037743347	-0.258086622	0.059279703
YALI1_B26659g	YALI0B20350g	-0.057474086	0.898899923	0.227548278	0.447110671	0.06211512	0.86404078
YALI1_B26679g	YALI0B20372g	0.051410079	0.653604415	-0.002521718	0.981666431	-0.069279482	0.452280851
YALI1_B26715g	YALI0B20394g	0.026811247	0.858055405	-0.076209319	0.478654146	-0.01717116	0.894146645
YALI1_B26728g	YALI0B20416g	-0.002337062	0.99090013	0.059034957	0.779832369	0.088038182	0.645861207
YALI1_B26749g	YALI0B20438g	0.038503537	0.771435701	-0.093767412	0.334905804	-0.027592652	0.814024378
YALI1_B26763g	YALI0B20460g	-0.034058095	0.764781909	0.000936014	0.992931864	0.006916649	0.951382856
YALI1_B26790g	YALI0B20482g	-0.054152431	0.574146113	0.001524615	0.987952194	0.045977945	0.592940915
YALI1_B26808g	YALI0B20504g	0.300285168	0.243451912	-0.272400233	0.25418396	-0.405490921	0.056682075
YALI1_B26845g	YALI0B20526g	-0.346894684	0.70497542	0.214320895	0.780453158	0.424728666	0.548231036
YALI1_B26888g	NA	-0.108827401	0.783799335	0.517090291	0.042172112	0.165789902	0.592940915
YALI1_B26926g	YALI0B20570g	0.058876471	0.68137801	-0.149201118	0.145765326	-0.130768769	0.216465837
YALI1_B26962g	YALI0B20592g	-0.033583532	0.829570169	0.130774222	0.209490385	0.083206449	0.440477315
YALI1_B26963g	YALI0B20614g	0.350741177	0.378133274	-0.329545817	0.350060332	-0.204247734	0.577086204
YALI1_B26984g	YALI0B20636g	0.105877705	0.715966077	-0.096199588	0.716837035	-0.042939111	0.877094132
YALI1_B27009g	YALI0B20658g	-0.097072059	0.351184486	0.068705031	0.502491165	0.125006964	0.135720953
YALI1_B27015g	YALI0B20680g	0.053073557	0.529280268	-0.048363977	0.520590647	-0.052479237	0.458760806
YALI1_B27057g	YALI0B20702g	-0.020778862	0.981929609	0.02096321	0.978057349	0.230917987	0.724429813
YALI1_B27102g	YALI0B20724g	-0.055234673	0.640681689	0.103684427	0.247175448	0.095277319	0.278094656
YALI1_B27110g	YALI0B20746g	-0.003943651	0.980084839	-0.087703308	0.395819674	0.008812822	0.947844775
YALI1_B27123g	YALI0B20746g	-0.043815808	0.808544479	0.059673306	0.694432489	0.082248545	0.534055467
YALI1_B27144g	YALI0B20768g	0.193035096	0.416261399	-0.256820134	0.18306921	-0.14914352	0.46675912
YALI1_B27150g	YALI0B20790g	-0.065531362	0.778802243	-0.0786501	0.698415727	0.001077826	0.996701218
YALI1_B27179g	YALI0B20812g	-0.17114587	0.41277179	0.175472932	0.339093474	0.235168623	0.142091353
YALI1_B27211g	YALI0B20834g	-0.167628229	0.204903273	0.198025148	0.083626543	0.183675389	0.10266946
YALI1_B27254g	YALI0B20856g	-0.039978506	0.745758526	0.058895524	0.563419991	0.020854345	0.861542078
YALI1_B27280g	YALI0B20878g	-0.00072388	0.993229862	0.001916918	0.984258246	-0.00361344	0.974375559
YALI1_B27293g	YALI0B20900g	-0.00821794	0.9808571	0.042658806	0.887373884	-0.021008235	0.943726527
YALI1_B27307g	YALI0B20911g	0.008617275	0.959164895	-0.152713488	0.123987118	-0.015976607	0.909577604
YALI1_B27320g	YALI0B20922g	-0.110281342	0.580250628	0.10970166	0.530964474	0.08958332	0.617728127
YALI1_B27339r	YALI0B20936r	-0.746079848	0.194886767	1.054037807	0.057529799	0.820734203	0.085892331
YALI1_B27360g	YALI0B20944g	-0.277760965	0.129062609	0.298158371	0.063604464	0.335736918	0.021770302
YALI1_B27399g	YALI0B20966g	0.017576306	0.921628554	0.070067186	0.59254419	0.058298993	0.651623532
YALI1_B27404g	YALI0B20988g	0.254660081	0.131945358	-0.209601365	0.163182155	-0.176058098	0.238713842
YALI1_B27429g	YALI0B21010g	0.222670627	0.619275077	-0.251970417	0.476052167	-0.072265781	0.862886678
YALI1_B27454g	YALI0B21032g	0.117898705	0.252410264	-0.113004979	0.21622199	-0.133093379	0.11307717
YALI1_B27460g	YALI0B21054g	-0.10759492	0.384646729	0.146685013	0.156362258	0.15881	0.098070314
YALI1_B27485g	YALI0B21076g	0.213008772	0.419677941	-0.251161455	0.275168178	-0.268761315	0.231440265
YALI1_B27500g	YALI0B21098g	-0.130065014	0.242306194	0.072126305	0.52850147	0.092619698	0.368968808
YALI1_B27534g	YALI0B21120g	-0.016966464	0.900921573	0.059115552	0.556686711	0.008253533	0.947429443
YALI1_B27564g	YALI0B21142g	0.04190303	0.920598216	0.137434027	0.680010923	0.102543539	0.744633572
YALI1_B27570g	YALI0B21164g	0.125979867	0.337490598	-0.081662535	0.525975737	-0.071221505	0.566532347
YALI1_B27588g	YALI0B21186g	0.063699123	0.671845906	-0.070646422	0.578385142	-0.08308084	0.485702122
YALI1_B27615g	NA	0.063864346	0.812782472	-0.314290834	0.06566213	-0.12764468	0.539413648
YALI1_B27637g	YALI0B21208g	0.167173204	0.268855108	-0.084402348	0.590104496	-0.181883882	0.143625601
YALI1_B27645g	YALI0B21230g	-0.113051787	0.508444211	0.102649868	0.511771456	0.153383908	0.264412143
YALI1_B27662g	YALI0B21252g	0.427404767	0.150181017	-0.259086727	0.388276695	-0.506090575	0.041598873
YALI1_B27685g	YALI0B21274g	0.174679046	0.249850599	0.086056239	0.584036881	-0.064152655	0.677146121
YALI1_B27689g	YALI0B21296g	0.231710452	0.166054542	-0.182938295	0.235798412	-0.194277225	0.182321611
YALI1_B27723g	YALI0B21318g	-0.109725621	0.7478791	0.09470585	0.765462893	0.160637868	0.55082019
YALI1_B27777g	YALI0B21340g	-0.130575881	0.207943613	0.127998694	0.171327748	0.12988598	0.153256045
YALI1_B27805g	YALI0B21362g	0.45467464	0.026190237	-0.384389217	0.046067838	-0.491962046	0.003012
YALI1_B27837g	YALI0B21384g	0.13318157	0.461446222	-0.21952307	0.121489759	-0.189911342	0.184347952
YALI1_B27857g	YALI0B21406g	0.05502355	0.850731865	0.140537508	0.511187796	0.037291366	0.878298207
YALI1_B27874g	YALI0B21428g	-0.20656725	0.257574037	0.275868646	0.059361136	0.194701029	0.235808443
YALI1_B27929g	YALI0B21450g	-0.041292647	0.936928213	0.064898566	0.88894704	0.159804513	0.688025816
YALI1_B27968g	YALI0B21472g	-0.589481251	0.403691493	0.880952552	0.092072194	0.70075856	0.203869915
YALI1_B27984g	YALI0B21494g	0.003090911	0.993107508	-0.301276866	0.301992481	-0.067574381	0.855842179
YALI1_B28017g	YALI0B21516g	0.00952486	0.982495341	-0.163354389	0.599833554	-0.126849297	0.682340883
YALI1_B28025g	YALI0B21527g	0.187824668	0.214017457	-0.287601712	0.015527942	-0.223404249	0.081228345
YALI1_B28053g	YALI0B21538g	0.016717046	0.971987794	-0.063784988	0.873147636	-0.087283408	0.803701142
YALI1_B28098g	YALI0B21560g	-0.131347718	0.490072055	0.317148893	0.017514274	0.237511026	0.090863197
YALI1_B28150g	YALI0B21582g	-0.754627315	0.146671727	0.82629925	0.058424802	0.781853715	0.070696296
YALI1_B28215g	YALI0B21604g	0.089039434	0.671845906	0.00103122	0.995213712	-0.094423611	0.581079183
YALI1_B28268g	YALI0B21626g	0.15311975	0.166023198	-0.177206752	0.060572618	-0.119951128	0.244054316
YALI1_B28292g	YALI0B21662g	-0.004464623	0.97479703	-0.090647964	0.287982279	-0.022251063	0.839868361
YALI1_B28349g	YALI0B21670g	0.081195432	0.606628605	-0.024609339	0.882597332	-0.008767044	0.957357525
YALI1_B28357g	YALI0B21692g	-0.086403541	0.68122329	0.021913056	0.924456639	0.087327585	0.632411408
YALI1_B28374g	YALI0B21714g	0.092971387	0.71223885	-0.05887122	0.810010709	-0.035443708	0.879511618
YALI1_B28394g	YALI0B21780g	0.304578749	0.597716845	0.164768033	0.77279172	-0.251683445	0.58694916
YALI1_B28430g	YALI0B21824g	0.118489461	0.896269623	-0.851231067	0.117509581	-0.451293876	0.458760806
YALI1_B28454g	YALI0B21846g	0.508499886	0.53442533	-1.092018236	0.053939671	-0.720758346	0.24376184
YALI1_B28472g	YALI0B21868g	0.384780621	0.60601357	-0.812928228	0.109837707	-0.504310425	0.363723328
YALI1_B28499g	YALI0B21890g	0.053036359	0.776507327	-0.007118557	0.967434546	-0.049268027	0.756102001
YALI1_B28511g	YALI0B21912g	0.079017724	0.688277846	0.072629484	0.680622608	-0.058194785	0.736808001
YALI1_B28572g	YALI0B21978g	-0.010768198	0.963260961	-0.12991512	0.393304969	-0.044569791	0.801118408
YALI1_B28584g	YALI0B22000g	0.057634809	0.68047946	0.068263063	0.562025993	0.006571072	0.963804723
YALI1_B28659g	YALI0B22066g	-0.244342384	0.14151253	0.210485105	0.161392298	0.221200783	0.134306249
YALI1_B28735g	YALI0B22088g	0.02218366	0.823819175	0.024933299	0.772628143	-0.001817811	0.985136637
YALI1_B28744g	YALI0B22110g	-0.051319322	0.764997643	0.112951542	0.387707011	0.039754516	0.792523927
YALI1_B28781g	YALI0B22125g	0.258575834	0.486473377	0.190090622	0.59498554	-0.256211313	0.409114342
YALI1_B28789g	YALI0B22132g	0.241374612	0.105733054	-0.273340637	0.02444037	-0.229925906	0.062334041
YALI1_B28830g	YALI0B22154g	0.143988441	0.183670029	-0.194259638	0.024044458	-0.133976097	0.156718784
YALI1_B28933g	YALI0B22176g	-0.33567867	0.099085832	0.316361997	0.082223894	0.312168637	0.072210703
YALI1_B29008g	YALI0B22198g	-0.114764268	0.465012733	0.10900081	0.447237384	0.055429619	0.724429813
YALI1_B29037g	YALI0B22220g	0.189994883	0.349149051	-0.228111271	0.184962817	-0.248725427	0.12702096
YALI1_B29051g	YALI0B22242g	0.025749454	0.858177466	-0.026026539	0.838586769	0.020146655	0.870246131
YALI1_B29108g	YALI0B22286g	-0.071307357	0.480050574	0.099562646	0.233702336	0.078893171	0.358970092
YALI1_B29133g	YALI0B22308g	-0.017281918	0.887376749	0.006890011	0.951618692	0.028044742	0.786206918
YALI1_B29153g	YALI0B22330g	0.026842907	0.85903941	-0.113995468	0.24875432	-0.047014044	0.68103874
YALI1_B29191g	YALI0B22374g	-0.049394539	0.771435701	0.079208942	0.571075036	0.095550091	0.452406428
YALI1_B29202g	YALI0B22396g	0.208723078	0.150181017	-0.085376457	0.578565113	-0.169976172	0.17075696
YALI1_B29227g	YALI0B22418g	-0.093180984	0.505779821	0.132400157	0.24875432	0.138371255	0.214938926
YALI1_B29243g	YALI0B22440g	-0.029416644	0.820031119	0.037417363	0.734818563	0.041894924	0.682095973
YALI1_B29266g	YALI0B22462g	-0.005407719	0.980084839	0.031527391	0.863743682	0.044650582	0.781357157
YALI1_B29310g	YALI0B22484g	-0.031157957	0.831854564	0.000913594	0.994510513	0.072330923	0.498803612
YALI1_B29360g	NA	-0.298787261	0.526906653	-0.120766164	0.801039053	0.282459388	0.476597748
YALI1_B29364g	NA	-0.408562552	0.293349927	-0.173509667	0.669907628	0.212569505	0.577086204
YALI1_B29419g	YALI0B22506g	0.282933525	0.681211145	-0.441918309	0.381014964	-0.240733167	0.669427737
YALI1_B29436g	NA	-0.071772496	0.754537209	0.156697209	0.373523825	0.081960135	0.660724267
YALI1_B29446g	YALI0B22528g	0.03398605	0.803126758	-0.027392472	0.828540244	-0.024960467	0.836359419
YALI1_B29483g	YALI0B22550g	0.093776779	0.661278073	-0.081033047	0.657484032	-0.021946003	0.915928459
YALI1_B29505g	YALI0B22572g	0.115686498	0.544711816	-0.139537839	0.378130198	-0.177465283	0.221411439
YALI1_B29507g	YALI0B22594g	0.018717835	0.958535677	0.192585234	0.428836772	0.009835391	0.975204089
YALI1_B29528g	YALI0B22616g	0.011460537	0.920211512	0.016658331	0.868649897	-0.007377095	0.942133022
YALI1_B29539g	YALI0B22638g	0.048964241	0.710038991	-0.084264704	0.412677183	-0.079062016	0.428731344
YALI1_B29548g	YALI0B22660g	-0.023798752	0.893534213	0.101755906	0.422269386	0.066405029	0.615246741
YALI1_B29562g	YALI0B22682g	-0.079495883	0.574417	0.178781472	0.080780286	0.157431789	0.121957796
YALI1_B29637g	YALI0B22704g	0.173767683	0.270297176	-0.224061192	0.096249948	-0.211005709	0.120324295
YALI1_B29662g	YALI0B22726g	0.008119376	0.959164895	0.015553128	0.910025521	0.018198988	0.885659364
YALI1_B29711g	YALI0B22748g	0.126088737	0.442113647	-0.059635629	0.726385741	-0.068761277	0.656607567
YALI1_B29718g	YALI0B22770g	0.097416596	0.522815439	-0.12756161	0.290255465	-0.076869219	0.554686609
YALI1_B29742g	YALI0B22792g	0.020998479	0.921558019	0.090699249	0.558419111	0.03524389	0.835537136
YALI1_B29753g	YALI0B22814g	-0.02800632	0.930145419	0.346440109	0.066708255	0.176415499	0.393655964
YALI1_B29779g	YALI0B22836g	-0.038467514	0.843259269	0.145951777	0.272046436	0.025193868	0.882579799
YALI1_B29785g	YALI0B22858g	-0.077666727	0.476677314	0.033547435	0.77279172	0.10128082	0.249996883
YALI1_B29844g	YALI0B22880g	-0.123024923	0.540543048	0.122961127	0.47181288	0.12450681	0.445066515
YALI1_B29867g	YALI0B22902g	0.042948566	0.824407022	0.078996509	0.606127119	0.04013218	0.803367975
YALI1_B29883g	YALI0B22924g	0.185343092	0.431102563	-0.044618138	0.870946091	-0.173039285	0.381577504
YALI1_B29895g	YALI0B22946g	0.053380885	0.774711985	-0.07707323	0.614743446	-0.103030587	0.452280851
YALI1_B29905g	YALI0B22968g	-0.089735107	0.45649013	0.048231703	0.696632253	0.105140192	0.291095921
YALI1_B29915g	YALI0B22990g	0.025120111	0.945372038	0.100579076	0.714916521	0.082426357	0.767036582
YALI1_B29941g	YALI0B23012g	-0.133857651	0.31051663	0.153806839	0.184755189	0.144519185	0.196416139
YALI1_B29972g	YALI0B23034g	0.144765183	0.463881489	-0.216400943	0.161392298	-0.126512009	0.452280851
YALI1_B29977g	YALI0B23056g	0.048347149	0.775316916	0.137534922	0.261928152	0.058374398	0.676925005
YALI1_B29995g	YALI0B23078g	-0.031159839	0.803126758	0.014179508	0.906500537	0.061981206	0.498746379
YALI1_B30024g	YALI0B23100g	-0.034520656	0.858177466	0.109385762	0.416816848	0.047893868	0.764619191
YALI1_B30036g	YALI0B23111g	0.104604	0.716369304	-0.299958601	0.124843525	-0.122440473	0.593886787
YALI1_B30039g	YALI0B23122g	-0.014202478	0.956331895	-0.159689924	0.348001534	-0.012103437	0.956620132
YALI1_B30066g	YALI0B23144g	0.028500045	0.784748365	0.020153174	0.8369912	0.009077286	0.927991119
YALI1_B30090g	YALI0B23188g	-0.08650789	0.503982143	0.162708097	0.102903748	0.106396937	0.322099149
YALI1_B30123g	YALI0B23210g	0.103547314	0.406378351	-0.119139605	0.262715045	-0.094598056	0.377826002
YALI1_B30146g	YALI0B23232g	-0.142082563	0.152571133	0.160493117	0.054705681	0.149974797	0.078920591
YALI1_B30162g	YALI0B23254g	0.184197235	0.453921868	-0.137119187	0.556686711	-0.198709997	0.319611091
YALI1_B30163g	YALI0B23276g	0.08607792	0.581060204	-0.014364822	0.934185813	-0.044004912	0.762953919
YALI1_B30181g	YALI0B23298g	-0.019007491	0.901276471	0.104787902	0.314298035	0.042639528	0.720883102
YALI1_B30182g	YALI0B23320g	0.119031728	0.469617955	-0.019865906	0.916479053	-0.027428791	0.87272309
YALI1_B30214g	YALI0B23342g	0.066771227	0.814080503	-0.130935499	0.56400831	-0.142487012	0.506286105
YALI1_B30218g	YALI0B23364g	-0.069644534	0.580433174	0.054382776	0.645119259	0.077578089	0.456791316
YALI1_B30234g	YALI0B23386g	0.158703833	0.273314439	-0.250803621	0.022875152	-0.166447685	0.166261867
YALI1_B30275g	YALI0B23430g	-0.03188381	0.84199398	-0.059139989	0.643188369	0.005357857	0.973090386
YALI1_B30293g	YALI0B23452g	0.488373982	0.47425755	-0.146163987	0.811563873	-0.153294122	0.802747127
YALI1_B30303g	NA	0.753410877	0.24895854	0.239747245	0.7729668	-0.426290453	0.493203061
YALI1_B30333g	NA	0.017231428	0.971579705	-0.05799517	0.879013898	-0.004261318	0.992989538
YALI1_B30337g	YALI0B23474g	-0.031110148	0.952979824	-0.083883762	0.849223207	0.088687	0.827941342
YALI1_B30382g	YALI0B23496g	-0.177186243	0.806769366	0.039185137	0.956616235	0.252733681	0.668427842
YALI1_C00098g	NA	-0.177742799	0.505779821	-0.001936783	0.99496126	0.150067536	0.522364331
YALI1_C00107g	NA	0.418391267	0.361773905	-0.672488001	0.066263881	-0.633307793	0.068645667
YALI1_C00116g	YALI0C00110g	0.075169017	0.732252718	-0.263440933	0.068284622	-0.154255709	0.330306256
YALI1_C00141g	YALI0C00132g	0.203172077	0.513828919	-0.270334306	0.299513119	-0.057071727	0.855480424
YALI1_C00164g	YALI0C00165g	-0.024739441	0.88385316	-0.037859388	0.795335089	-0.001310797	0.994670599
YALI1_C00167g	NA	-0.098493496	0.836587183	0.0468572	0.920000366	0.193810106	0.574941308
YALI1_C00177g	NA	-0.02150828	0.95333273	-0.158963382	0.546115884	-0.019446229	0.95041838
YALI1_C00209g	YALI0C00187g	-0.025461209	0.804394854	0.053187176	0.502194672	0.040079702	0.624763261
YALI1_C00230g	YALI0C00209g	-0.108301352	0.373456642	-0.032332959	0.815038599	0.066342244	0.579365892
YALI1_C00258g	YALI0C00231g	0.146889703	0.612769715	-0.212549412	0.333846908	-0.12826871	0.590830287
YALI1_C00293g	YALI0C00253g	-0.214802638	0.308184242	0.173634225	0.379533663	0.164742289	0.409096826
YALI1_C00331g	YALI0C00275g	0.039179846	0.884383829	-0.190225942	0.2886352	-0.016530069	0.945408808
YALI1_C00335g	YALI0C00297g	-0.234463123	0.558379775	0.142038507	0.678050298	0.16047145	0.631628021
YALI1_C00368g	YALI0C00341g	-0.137778686	0.590691413	-0.074474936	0.77279172	0.107008339	0.631628021
YALI1_C00422g	YALI0C00363g	-0.080404029	0.516892928	0.051957467	0.668463519	0.090798279	0.381243978
YALI1_C00442g	YALI0C00385g	0.089234466	0.88220448	-0.531080449	0.170273883	-0.42234493	0.285768704
YALI1_C00464g	YALI0C00407g	-0.02129732	0.900950274	0.043175977	0.767035507	-0.002817066	0.986245848
YALI1_C00503g	YALI0C00429g	-0.002882645	0.989069231	-0.012419009	0.953752958	-0.012208784	0.955182536
YALI1_C00550g	YALI0C00451g	-0.016058196	0.93114098	0.082366246	0.539779922	0.053625572	0.714565331
YALI1_C00615g	YALI0C00473g	0.05504065	0.616904513	0.028530476	0.7935337	-0.056602554	0.540996414
YALI1_C00694g	YALI0C00495g	-0.18625508	0.152571133	0.158960846	0.19100434	0.195744359	0.07524471
YALI1_C00710g	NA	-0.255388756	0.549934347	0.413086161	0.210266651	0.246154354	0.480590592
YALI1_C00739g	YALI0C00539g	-0.128926459	0.526564235	0.133098391	0.454769822	0.112214288	0.539413648
YALI1_C00766g	YALI0C00550g	0.04197378	0.762345777	-0.061111226	0.589127726	-0.044000555	0.702462965
YALI1_C00772g	YALI0C00561g	0.031132439	0.810836738	0.038630027	0.728175517	-0.013563053	0.908453076
YALI1_C00826g	YALI0C00627g	-0.039815798	0.801491356	-0.013588527	0.93088562	0.056223822	0.643865939
YALI1_C00827g	NA	-0.127344316	0.65917065	-0.057377876	0.841660953	0.119400224	0.608712856
YALI1_C00841g	YALI0C00649g	0.212184791	0.54007296	-0.122880932	0.716881836	-0.187174518	0.527483009
YALI1_C00852g	NA	-0.07041156	0.836321234	-0.131556918	0.61166327	0.03778758	0.898766718
YALI1_C00913g	YALI0C00671g	0.039084026	0.959628276	-0.483320359	0.335836401	-0.390787634	0.440864806
YALI1_C00958g	YALI0C00693g	0.140434777	0.762025003	0.088130686	0.8450921	-0.188281322	0.603823451
YALI1_C00962g	YALI0C00715g	0.269331843	0.30066418	-0.208616588	0.38510917	-0.270206677	0.206249926
YALI1_C00999g	YALI0C00759g	0.05530614	0.604479745	0.008480746	0.942774304	-0.020436681	0.851414936
YALI1_C01043g	YALI0C00781g	0.038590548	0.811056549	-0.134868219	0.218793201	-0.035917625	0.790591875
YALI1_C01072g	YALI0C00803g	-0.199806059	0.776611558	0.251432734	0.679107088	0.173265428	0.773648428
YALI1_C01106g	YALI0C00825g	0.125197408	0.833034956	-0.295616079	0.460659823	-0.138572823	0.762773067
YALI1_C01129g	YALI0C00847g	-0.022665026	0.901778021	0.139714262	0.255158053	0.029554248	0.848181803
YALI1_C01161g	YALI0C00869g	0.092045033	0.599573159	-0.153849565	0.277456553	-0.040408682	0.805639312
YALI1_C01244g	YALI0C00891g	0.057595613	0.563191942	-0.105805677	0.165091896	-0.102279097	0.172342747
YALI1_C01297g	YALI0C00913g	-0.035480325	0.901977181	-0.040836886	0.877436163	-0.066895431	0.776063733
YALI1_C01338g	YALI0C00957g	-0.032174008	0.844389325	0.067288441	0.5967566	-0.01612127	0.91279989
YALI1_C01356g	YALI0C00979g	-0.074326481	0.933880306	0.30893277	0.635472409	0.355582251	0.560830987
YALI1_C01416g	YALI0C01023g	0.12586657	0.423439323	-0.179325481	0.157851579	-0.15662686	0.212282979
YALI1_C01433g	YALI0C01045g	0.082974235	0.518652679	-0.031685464	0.817429724	-0.011188084	0.937912816
YALI1_C01491g	YALI0C01067g	0.729897419	0.621934043	-1.735990613	0.107952038	-0.634841277	0.614051632
YALI1_C01505g	YALI0C01089g	0.261632704	0.311661806	-0.072583196	0.808186127	-0.198579115	0.387009596
YALI1_C01520g	YALI0C01111g	0.215651113	0.228356884	-0.340805222	0.014147398	-0.23562018	0.1202155
YALI1_C01535g	YALI0C01133g	-0.134540407	0.246582418	0.144000293	0.153259271	0.133347145	0.192325094
YALI1_C01576g	YALI0C01155g	0.134115524	0.324346788	-0.130983751	0.280746329	-0.175414996	0.104173408
YALI1_C01590g	NA	0.009912498	0.955447989	-0.040154477	0.780238049	-0.007990102	0.957589935
YALI1_C01596g	YALI0C01177g	-0.088976506	0.511935282	0.188449	0.059508768	0.139141857	0.174326967
YALI1_C01675g	YALI0C01199g	-0.233197881	0.640681689	-0.171123152	0.728419082	0.088583159	0.855106149
YALI1_C01694g	NA	-0.006079792	0.987245907	-0.071086239	0.833252269	0.018640228	0.956427633
YALI1_C01720g	YALI0C01221g	0.018334915	0.924523437	-0.120006582	0.351280547	-0.045007037	0.768986452
YALI1_C01789g	YALI0C01243g	-0.092386967	0.458504288	0.102252008	0.340895614	0.08259717	0.464118854
YALI1_C01800g	YALI0C01287g	0.203029976	0.191135419	-0.234636436	0.068356658	-0.185674217	0.16361557
YALI1_C01810g	YALI0C01309g	0.21772231	0.374042867	-0.233238878	0.261646689	-0.311237602	0.087933312
YALI1_C01826g	YALI0C01331g	0.151225188	0.329710202	-0.172309282	0.184164511	-0.128378307	0.333358224
YALI1_C01843g	NA	0.054751832	0.92461647	-0.41013497	0.26218554	-0.233495481	0.558156506
YALI1_C01847g	YALI0C01375g	-0.107363382	0.246582418	0.097298433	0.247175448	0.123455344	0.104735633
YALI1_C01876g	YALI0C01397g	-0.157879444	0.218196729	0.084363665	0.527313847	0.155117515	0.152260004
YALI1_C01944g	YALI0C01411g	-0.133040321	0.684212989	0.208731476	0.443738322	0.261168773	0.256113316
YALI1_C01965g	YALI0C01419g	0.073096241	0.685438705	-0.019596881	0.919208502	-0.083323284	0.561761288
YALI1_C01993g	YALI0C01441g	0.006651816	0.964546123	-0.031560553	0.79931268	0.02574006	0.831282723
YALI1_C02044g	NA	-0.372968734	0.203449797	0.33691837	0.232205924	0.36670437	0.139307867
YALI1_C02053g	YALI0C01463g	-0.037715302	0.839766045	-0.049437896	0.754586893	-0.033127602	0.832821508
YALI1_C02086g	YALI0C01485g	0.068589368	0.673488271	-0.203956507	0.056660661	-0.061064272	0.650796866
YALI1_C02117g	YALI0C01507g	0.069988504	0.793807006	0.157236992	0.432325556	0.080136362	0.709130359
YALI1_C02125r	YALI0C01529r	0.50134547	0.104279329	-0.110744982	0.779832369	-0.381809635	0.156718784
YALI1_C02152g	YALI0C01573g	0.293518666	0.127820755	-0.364790668	0.018013467	-0.321337399	0.043490399
YALI1_C02160g	NA	0.31088206	0.243451912	0.038652197	0.90556095	-0.172448166	0.466151949
YALI1_C02188g	YALI0C01595g	0.036911447	0.803198309	-0.0794729	0.482384477	-0.000894138	0.995861279
YALI1_C02215g	YALI0C01617g	0.116886257	0.465012733	-0.29091832	0.008346092	-0.185722474	0.128779278
YALI1_C02248g	YALI0C01639g	-0.073305686	0.710710435	0.046200565	0.810727656	0.097435566	0.541634224
YALI1_C02291g	NA	-0.235742026	0.5851897	0.238174596	0.498180686	0.239328534	0.492505121
YALI1_C02332g	YALI0C01694g	-0.326507103	0.094246091	0.339408563	0.042555555	0.365364041	0.021339046
YALI1_C02374g	NA	-0.065501028	0.813644422	0.221205789	0.276788441	0.014091314	0.956427633
YALI1_C02391g	YALI0C01716g	-0.026428386	0.87030234	0.128711547	0.218455952	0.041254264	0.756724998
YALI1_C02402g	YALI0C01738g	0.049615691	0.858177466	-0.078579065	0.734762695	-0.112513476	0.5797548
YALI1_C02421g	NA	-0.736878098	0.187022224	0.486856526	0.353627146	0.749438199	0.125005986
YALI1_C02424g	NA	0.002944933	0.994326833	-0.195404781	0.60897909	-0.138323408	0.739826052
YALI1_C02441g	YALI0C01760g	-0.216712766	0.152571133	0.25887158	0.044539441	0.230247549	0.069762351
YALI1_C02521g	YALI0C01826g	0.097450912	0.712993392	0.075540434	0.761776907	-0.0435698	0.858387414
YALI1_C02550g	YALI0C01859g	-0.158357235	0.368458104	0.091202131	0.607109077	0.095578873	0.579365892
YALI1_C02588g	YALI0C01903g	0.073046906	0.484649794	-0.109323118	0.188399777	-0.112224434	0.156834422
YALI1_C02611g	YALI0C01925g	0.172622103	0.631637546	-0.219413529	0.458082319	-0.235212185	0.390130386
YALI1_C02639g	YALI0C01969g	0.079538426	0.718932639	-0.032669591	0.884132333	-0.101220271	0.575196075
YALI1_C02686g	YALI0C01991g	0.031697543	0.841903615	-0.122384327	0.248826736	-0.122367271	0.229295537
YALI1_C02831g	YALI0C02057g	-0.207832188	0.124736404	0.204046641	0.084131523	0.219615869	0.057635522
YALI1_C02866g	YALI0C02167g	-0.070792603	0.876953611	0.133937935	0.723695297	0.174151366	0.589863877
YALI1_C02873g	NA	0.010277364	0.985902027	0.034832508	0.949632829	0.064357913	0.898766718
YALI1_C02904g	YALI0C02211g	-0.254583738	0.108245953	0.358653395	0.00424346	0.295939565	0.025329788
YALI1_C03036g	YALI0C02233g	-0.121313079	0.396803953	0.00344911	0.983092455	0.083328191	0.544432886
YALI1_C03197g	NA	-0.031836722	0.901276471	0.01019956	0.964285144	-0.004497472	0.985136637
YALI1_C03201g	NA	0.077003337	0.699774698	-0.150920187	0.303350824	-0.091655064	0.556156985
YALI1_C03213g	NA	-0.161290501	0.376643418	0.035425757	0.872372563	0.132317514	0.408512155
YALI1_C03221g	YALI0C02255g	0.125042381	0.514486148	-0.070482438	0.705371813	-0.090184037	0.588860709
YALI1_C03225g	NA	0.471615001	0.369232744	-0.338922964	0.451832403	-0.488994292	0.22270579
YALI1_C03246g	YALI0C02321g	0.116446932	0.322082857	-0.165924938	0.078497534	-0.161106255	0.077890465
YALI1_C03261g	NA	-0.011992664	0.955695912	0.055669833	0.742500663	0.121317866	0.372306053
YALI1_C03272g	YALI0C02343g	0.013405035	0.933123813	0.072167702	0.540635779	0.042158864	0.735132851
YALI1_C03286g	NA	0.576003683	0.225523102	-0.83683569	0.008346092	-0.625815457	0.07480929
YALI1_C03335g	YALI0C02365g	-0.066885909	0.764789351	-0.062747104	0.760873019	-0.036706403	0.859131301
YALI1_C03349g	YALI0C02387g	-0.066333995	0.781027397	0.221696786	0.198296579	0.177161797	0.280472025
YALI1_C03360g	NA	-0.085817322	0.620509849	0.069842116	0.663178063	0.08554919	0.548510279
YALI1_C03374g	NA	0.484374712	0.193002786	-0.476710161	0.127622242	-0.639364016	0.020511975
YALI1_C03378g	YALI0C02409g	-0.028713095	0.858277072	0.075667651	0.524563369	0.008885203	0.951856476
YALI1_C03415g	YALI0C02431g	-0.086712423	0.624276942	0.186563588	0.157680666	0.083500889	0.570059385
YALI1_C03461g	YALI0C02453g	-0.099796855	0.30066418	0.13548606	0.087732195	0.104006128	0.212061881
YALI1_C03495g	YALI0C02475g	0.001906674	0.988814452	0.106936751	0.280106743	0.039929715	0.729404661
YALI1_C03513g	YALI0C02497g	0.111862535	0.407335646	-0.13819418	0.223589206	-0.093367436	0.428192431
YALI1_C03534g	YALI0C02519g	0.17372666	0.266576334	-0.143127675	0.316063482	-0.147027924	0.280241397
YALI1_C03582g	YALI0C02563g	0.07395676	0.494836457	-0.020928834	0.863785982	-0.067804074	0.458760806
YALI1_C03596g	YALI0C02585g	0.103135647	0.470390062	-0.107925172	0.371617138	-0.064982526	0.614051632
YALI1_C03615g	YALI0C02607g	-0.068126873	0.746876421	0.139741218	0.388684657	0.11719665	0.45472285
YALI1_C03674g	YALI0C02629g	-0.201123167	0.188612114	0.300547989	0.014642536	0.263149305	0.027380467
YALI1_C03696g	NA	-0.05907345	0.842469559	0.276210467	0.127232696	0.285025225	0.101946671
[truncated: 5,322 more rows]
